# Supplementary material for: Transcriptome analysis provides insight into the regulatory mechanisms underlying pollen germination recovery at normal high ambient temperature in wild banana (Musa itinerans)
Source: Front Plant Sci. 2023 Sep 26;14:1255418. doi: 10.3389/fpls.2023.1255418 (PMC10562711; doi:10.3389/fpls.2023.1255418)
Supplement: Supplementary file 2 [file Table_1.xlsx]

## Sheet: Sheet1
Primers used for qRT-PCR analysis
Gene ID	Primer name	Primer sequence
Ma04_g30160	F	GGGGAGGGGAACTGGAATG
Ma04_g30160	R	TCTCATTGTCCGTCCTTCCC
Ma08_g02860	F	GAATCCGATACCAAGCAGCG
Ma08_g02860	R	CTCTCCAAATGCTCCTTCGC
Ma09_g01640	F	CTCCTTTCAAGTCTCCCGGA
Ma09_g01640	R	CTCGCACAAGTACCTGAACG
Ma09_g07920	F	CCAAGCGGTTCATCATTGCA
Ma09_g07920	R	AGTCGGAACAGGGGATGAAG
Ma10_g07950	F	CAAAGGGAAGGTGCCACATC
Ma10_g07950	R	AACCCGAGTGCCAGTACTAC
Ma10_g09480	F	CAAGGCCGGTAAGAAGAAGC
Ma10_g09480	R	TCCTCTCCAAGTGCTCCTTC
UBQ	F	GGCACCACAAACAACACAGG
UBQ	R	AGACGAGCAAGGCTTCCATT
