# Supplementary material for: Transcriptome analysis provides insight into the regulatory mechanisms underlying pollen germination recovery at normal high ambient temperature in wild banana (Musa itinerans)
Source: Front Plant Sci. 2023 Sep 26;14:1255418. doi: 10.3389/fpls.2023.1255418 (PMC10562711; doi:10.3389/fpls.2023.1255418)
Supplement: Supplementary Table 2 — The significant enrichment pathways (p < 0.01) in each type of GO enrichment pathway. [file Table_2.xlsx]

## Sheet: Biological processes
Category	GO.ID	Term	Up	Down	DEG	Total	Pvalue	FDR	Up_Gene	Down_Gene
BP	GO:0016556	mRNA modification	8	0	8	54	0.00016802	0.210101	Ma02_g06650(Ma02_g06650),Ma05_g28510(Ma05_g28510),Ma07_g18980(Ma07_g18980),Ma07_g23240(Ma07_g23240),Ma10_g00820(Ma10_g00820),Ma11_g00580(Ma11_g00580),Ma11_g15290(Ma11_g15290),Ma11_g16190(Ma11_g16190)	-
BP	GO:0046835	carbohydrate phosphorylation	2	5	7	44	0.000273166	0.210101	Ma07_g02160(Ma07_g02160),Ma08_g29950(Ma08_g29950)	Ma03_g16610(Ma03_g16610),Ma06_g13970(Ma06_g13970),Ma07_g11340(Ma07_g11340),Ma07_g13520(Ma07_g13520),Ma11_g17680(Ma11_g17680)
BP	GO:0072488	ammonium transmembrane transport	1	4	5	21	0.00029827	0.210101	Ma05_g31280(Ma05_g31280)	Ma01_g01260(Ma01_g01260),Ma11_g02330(Ma11_g02330),Ma11_g04350(Ma11_g04350),Ma11_g15780(Ma11_g15780)
BP	GO:1990481	mRNA pseudouridine synthesis	3	0	3	6	0.000475186	0.232331	Ma11_g00580(Ma11_g00580),Ma11_g15290(Ma11_g15290),Ma11_g16190(Ma11_g16190)	-
BP	GO:0006000	fructose metabolic process	0	4	4	14	0.000587617	0.232331	-	Ma05_g30480(Ma05_g30480),Ma06_g13970(Ma06_g13970),Ma08_g07740(Ma08_g07740),Ma11_g17680(Ma11_g17680)
BP	GO:0006555	methionine metabolic process	1	4	5	25	0.000706752	0.232331	Ma00_g02300(Ma00_g02300)	Ma01_g15110(Ma01_g15110),Ma06_g08140(Ma06_g08140),Ma07_g01550(Ma07_g01550),Ma08_g16380(Ma08_g16380)
BP	GO:0015696	ammonium transport	1	4	5	25	0.000706752	0.232331	Ma05_g31280(Ma05_g31280)	Ma01_g01260(Ma01_g01260),Ma11_g02330(Ma11_g02330),Ma11_g04350(Ma11_g04350),Ma11_g15780(Ma11_g15780)
BP	GO:0015695	organic cation transport	1	4	5	28	0.00121582	0.298859	Ma05_g31280(Ma05_g31280)	Ma01_g01260(Ma01_g01260),Ma11_g02330(Ma11_g02330),Ma11_g04350(Ma11_g04350),Ma11_g15780(Ma11_g15780)
BP	GO:0010093	specification of floral organ identity	0	7	7	57	0.00135768	0.298859	-	Ma01_g19150(Ma01_g19150),Ma04_g36630(Ma04_g36630),Ma06_g16260(Ma06_g16260),Ma08_g23890(Ma08_g23890),Ma09_g01340(Ma09_g01340),Ma10_g21430(Ma10_g21430),Ma11_g17960(Ma11_g17960)
BP	GO:0090701	specification of plant organ identity	0	7	7	57	0.00135768	0.298859	-	Ma01_g19150(Ma01_g19150),Ma04_g36630(Ma04_g36630),Ma06_g16260(Ma06_g16260),Ma08_g23890(Ma08_g23890),Ma09_g01340(Ma09_g01340),Ma10_g21430(Ma10_g21430),Ma11_g17960(Ma11_g17960)
BP	GO:0019755	one-carbon compound transport	0	4	4	18	0.00163611	0.338964	-	Ma01_g07310(Ma01_g07310),Ma11_g02330(Ma11_g02330),Ma11_g04350(Ma11_g04350),Ma11_g15780(Ma11_g15780)
BP	GO:0015843	methylammonium transport	0	3	3	9	0.00186803	0.344961	-	Ma11_g02330(Ma11_g02330),Ma11_g04350(Ma11_g04350),Ma11_g15780(Ma11_g15780)
BP	GO:0040031	snRNA modification	3	0	3	9	0.00186803	0.344961	Ma07_g18980(Ma07_g18980),Ma11_g00580(Ma11_g00580),Ma11_g16190(Ma11_g16190)	-
BP	GO:0072521	purine-containing compound metabolic process	2	14	16	245	0.00250404	0.344961	Ma03_g30700(Ma03_g30700),Ma08_g29950(Ma08_g29950)	Ma03_g16610(Ma03_g16610),Ma06_g08140(Ma06_g08140),Ma06_g19810(Ma06_g19810),Ma06_g33780(Ma06_g33780),Ma07_g08070(Ma07_g08070),Ma07_g11340(Ma07_g11340),Ma07_g13520(Ma07_g13520),Ma08_g11220(Ma08_g11220),Ma08_g15010(Ma08_g15010),Ma08_g16380(Ma08_g16380),Ma08_g18880(Ma08_g18880),Ma09_g29220(Ma09_g29220),Ma10_g21130(Ma10_g21130),Ma11_g04770(Ma11_g04770)
BP	GO:0033353	S-adenosylmethionine cycle	0	2	2	3	0.00254726	0.344961	-	Ma06_g08140(Ma06_g08140),Ma08_g16380(Ma08_g16380)
BP	GO:0033467	CMP-keto-3-deoxy-D-manno-octulosonic acid metabolic process	1	1	2	3	0.00254726	0.344961	Ma04_g08050(Ma04_g08050)	Ma06_g28660(Ma06_g28660)
BP	GO:0033468	CMP-keto-3-deoxy-D-manno-octulosonic acid biosynthetic process	1	1	2	3	0.00254726	0.344961	Ma04_g08050(Ma04_g08050)	Ma06_g28660(Ma06_g28660)
BP	GO:0046439	L-cysteine metabolic process	0	2	2	3	0.00254726	0.344961	-	Ma06_g08140(Ma06_g08140),Ma08_g16380(Ma08_g16380)
BP	GO:0016073	snRNA metabolic process	4	0	4	21	0.00298428	0.344961	Ma02_g23820(Ma02_g23820),Ma07_g18980(Ma07_g18980),Ma11_g00580(Ma11_g00580),Ma11_g16190(Ma11_g16190)	-
BP	GO:0048449	floral organ formation	0	8	8	83	0.00303878	0.344961	-	Ma01_g19150(Ma01_g19150),Ma04_g36630(Ma04_g36630),Ma06_g16260(Ma06_g16260),Ma08_g23890(Ma08_g23890),Ma09_g01340(Ma09_g01340),Ma09_g31100(Ma09_g31100),Ma10_g21430(Ma10_g21430),Ma11_g17960(Ma11_g17960)
BP	GO:0006869	lipid transport	1	7	8	86	0.0037884	0.344961	Ma09_g22560(Ma09_g22560)	Ma01_g03600(Ma01_g03600),Ma02_g04260(Ma02_g04260),Ma05_g22190(Ma05_g22190),Ma06_g24400(Ma06_g24400),Ma07_g25300(Ma07_g25300),Ma08_g22060(Ma08_g22060),Ma11_g18170(Ma11_g18170)
BP	GO:0000079	regulation of cyclin-dependent protein serine/threonine kinase activity	0	4	4	23	0.00421508	0.344961	-	Ma04_g31690(Ma04_g31690),Ma05_g24150(Ma05_g24150),Ma08_g00400(Ma08_g00400),Ma10_g15050(Ma10_g15050)
BP	GO:0080086	stamen filament development	0	4	4	23	0.00421508	0.344961	-	Ma01_g21340(Ma01_g21340),Ma06_g29060(Ma06_g29060),Ma09_g06730(Ma09_g06730),Ma10_g17880(Ma10_g17880)
BP	GO:1904029	regulation of cyclin-dependent protein kinase activity	0	4	4	23	0.00421508	0.344961	-	Ma04_g31690(Ma04_g31690),Ma05_g24150(Ma05_g24150),Ma08_g00400(Ma08_g00400),Ma10_g15050(Ma10_g15050)
BP	GO:0048544	recognition of pollen	2	1	3	12	0.00458066	0.344961	Ma08_g02860(Ma08_g02860),Ma10_g09480(Ma10_g09480)	Ma08_g04720(Ma08_g04720)
BP	GO:0060321	acceptance of pollen	2	1	3	12	0.00458066	0.344961	Ma08_g02860(Ma08_g02860),Ma10_g09480(Ma10_g09480)	Ma08_g04720(Ma08_g04720)
BP	GO:0000495	box H/ACA snoRNA 3'-end processing	2	0	2	4	0.00499518	0.344961	Ma11_g00580(Ma11_g00580),Ma11_g16190(Ma11_g16190)	-
BP	GO:0009310	amine catabolic process	0	2	2	4	0.00499518	0.344961	-	Ma08_g23080(Ma08_g23080),Ma09_g20950(Ma09_g20950)
BP	GO:0031035	myosin filament disassembly	2	0	2	4	0.00499518	0.344961	Ma03_g17810(Ma03_g17810),Ma09_g07320(Ma09_g07320)	-
BP	GO:0031037	myosin II filament disassembly	2	0	2	4	0.00499518	0.344961	Ma03_g17810(Ma03_g17810),Ma09_g07320(Ma09_g07320)	-
BP	GO:0033979	box H/ACA snoRNA metabolic process	2	0	2	4	0.00499518	0.344961	Ma11_g00580(Ma11_g00580),Ma11_g16190(Ma11_g16190)	-
BP	GO:0034964	box H/ACA snoRNA processing	2	0	2	4	0.00499518	0.344961	Ma11_g00580(Ma11_g00580),Ma11_g16190(Ma11_g16190)	-
BP	GO:0042402	cellular biogenic amine catabolic process	0	2	2	4	0.00499518	0.344961	-	Ma08_g23080(Ma08_g23080),Ma09_g20950(Ma09_g20950)
BP	GO:0046498	S-adenosylhomocysteine metabolic process	0	2	2	4	0.00499518	0.344961	-	Ma06_g08140(Ma06_g08140),Ma08_g16380(Ma08_g16380)
BP	GO:0080181	lateral root branching	0	2	2	4	0.00499518	0.344961	-	Ma11_g02330(Ma11_g02330),Ma11_g15780(Ma11_g15780)
BP	GO:0000096	sulfur amino acid metabolic process	1	5	6	55	0.00540029	0.365766	Ma00_g02300(Ma00_g02300)	Ma01_g15110(Ma01_g15110),Ma04_g02080(Ma04_g02080),Ma06_g08140(Ma06_g08140),Ma07_g01550(Ma07_g01550),Ma08_g16380(Ma08_g16380)
BP	GO:0015837	amine transport	0	3	3	13	0.00582596	0.377928	-	Ma11_g02330(Ma11_g02330),Ma11_g04350(Ma11_g04350),Ma11_g15780(Ma11_g15780)
BP	GO:0035265	organ growth	2	4	6	56	0.00590177	0.377928	Ma09_g27330(Ma09_g27330),Ma09_g27340(Ma09_g27340)	Ma04_g03630(Ma04_g03630),Ma04_g13930(Ma04_g13930),Ma08_g22060(Ma08_g22060),Ma11_g18170(Ma11_g18170)
BP	GO:0006099	tricarboxylic acid cycle	1	3	4	26	0.00663898	0.410219	Ma05_g30930(Ma05_g30930)	Ma01_g14040(Ma01_g14040),Ma08_g15010(Ma08_g15010),Ma08_g18880(Ma08_g18880)
BP	GO:0061077	chaperone-mediated protein folding	5	2	7	76	0.00697671	0.412108	Ma03_g03830(Ma03_g03830),Ma03_g26770(Ma03_g26770),Ma08_g04480(Ma08_g04480),Ma09_g20870(Ma09_g20870),Ma10_g09070(Ma10_g09070)	Ma08_g25360(Ma08_g25360),Ma09_g29640(Ma09_g29640)
BP	GO:0090697	post-embryonic plant organ morphogenesis	1	13	14	226	0.00717857	0.412108	Ma00_g00980(Ma00_g00980)	Ma01_g19150(Ma01_g19150),Ma04_g02080(Ma04_g02080),Ma04_g36630(Ma04_g36630),Ma05_g18400(Ma05_g18400),Ma06_g16260(Ma06_g16260),Ma08_g23890(Ma08_g23890),Ma09_g01340(Ma09_g01340),Ma09_g10330(Ma09_g10330),Ma09_g31100(Ma09_g31100),Ma10_g21430(Ma10_g21430),Ma11_g02330(Ma11_g02330),Ma11_g15780(Ma11_g15780),Ma11_g17960(Ma11_g17960)
BP	GO:0006415	translational termination	0	3	3	14	0.00725459	0.412108	-	Ma08_g09650(Ma08_g09650),Ma11_g05690(Ma11_g05690),Ma11_g12280(Ma11_g12280)
BP	GO:0009069	serine family amino acid metabolic process	2	3	5	42	0.00751657	0.412651	Ma00_g02300(Ma00_g02300),Ma04_g34720(Ma04_g34720)	Ma06_g08140(Ma06_g08140),Ma07_g12740(Ma07_g12740),Ma08_g16380(Ma08_g16380)
BP	GO:0006101	citrate metabolic process	1	3	4	27	0.00761565	0.412651	Ma05_g30930(Ma05_g30930)	Ma01_g14040(Ma01_g14040),Ma08_g15010(Ma08_g15010),Ma08_g18880(Ma08_g18880)
BP	GO:0009092	homoserine metabolic process	2	0	2	5	0.00816336	0.413088	Ma00_g02300(Ma00_g02300),Ma04_g34720(Ma04_g34720)	-
BP	GO:0002181	cytoplasmic translation	3	5	8	98	0.00829562	0.413088	Ma04_g27730(Ma04_g27730),Ma04_g35040(Ma04_g35040),Ma06_g17260(Ma06_g17260)	Ma01_g13040(Ma01_g13040),Ma03_g11320(Ma03_g11320),Ma03_g19410(Ma03_g19410),Ma05_g28870(Ma05_g28870),Ma11_g19060(Ma11_g19060)
BP	GO:0009150	purine ribonucleotide metabolic process	1	12	13	207	0.00842513	0.413088	Ma08_g29950(Ma08_g29950)	Ma03_g16610(Ma03_g16610),Ma06_g19810(Ma06_g19810),Ma06_g33780(Ma06_g33780),Ma07_g08070(Ma07_g08070),Ma07_g11340(Ma07_g11340),Ma07_g13520(Ma07_g13520),Ma08_g11220(Ma08_g11220),Ma08_g15010(Ma08_g15010),Ma08_g18880(Ma08_g18880),Ma09_g29220(Ma09_g29220),Ma10_g21130(Ma10_g21130),Ma11_g04770(Ma11_g04770)
BP	GO:0007187	G protein-coupled receptor signaling pathway, coupled to cyclic nucleotide second messenger	0	3	3	15	0.00887255	0.413088	-	Ma02_g15170(Ma02_g15170),Ma08_g22060(Ma08_g22060),Ma11_g18170(Ma11_g18170)
BP	GO:0007188	adenylate cyclase-modulating G protein-coupled receptor signaling pathway	0	3	3	15	0.00887255	0.413088	-	Ma02_g15170(Ma02_g15170),Ma08_g22060(Ma08_g22060),Ma11_g18170(Ma11_g18170)
BP	GO:0031126	snoRNA 3'-end processing	3	0	3	15	0.00887255	0.413088	Ma02_g23820(Ma02_g23820),Ma11_g00580(Ma11_g00580),Ma11_g16190(Ma11_g16190)	-
BP	GO:0044248	cellular catabolic process	12	43	55	1358	0.00911589	0.413088	Ma01_g18280(Ma01_g18280),Ma02_g13280(Ma02_g13280),Ma02_g23820(Ma02_g23820),Ma03_g05370(Ma03_g05370),Ma05_g27190(Ma05_g27190),Ma07_g05980(Ma07_g05980),Ma07_g15550(Ma07_g15550),Ma07_g18980(Ma07_g18980),Ma08_g22930(Ma08_g22930),Ma08_g29950(Ma08_g29950),Ma09_g07310(Ma09_g07310),Ma10_g12100(Ma10_g12100)	Ma03_g04440(Ma03_g04440),Ma03_g16610(Ma03_g16610),Ma03_g19410(Ma03_g19410),Ma04_g02080(Ma04_g02080),Ma04_g03630(Ma04_g03630),Ma04_g11710(Ma04_g11710),Ma04_g13930(Ma04_g13930),Ma04_g22020(Ma04_g22020),Ma04_g31690(Ma04_g31690),Ma04_g37200(Ma04_g37200),Ma05_g03910(Ma05_g03910),Ma05_g04300(Ma05_g04300),Ma05_g15800(Ma05_g15800),Ma05_g18400(Ma05_g18400),Ma05_g22420(Ma05_g22420),Ma06_g06840(Ma06_g06840)…
BP	GO:0009066	aspartate family amino acid metabolic process	1	4	5	44	0.00914846	0.413088	Ma00_g02300(Ma00_g02300)	Ma01_g15110(Ma01_g15110),Ma06_g08140(Ma06_g08140),Ma07_g01550(Ma07_g01550),Ma08_g16380(Ma08_g16380)
BP	GO:0010876	lipid localization	1	7	8	101	0.0098779	0.418715	Ma09_g22560(Ma09_g22560)	Ma01_g03600(Ma01_g03600),Ma02_g04260(Ma02_g04260),Ma05_g22190(Ma05_g22190),Ma06_g24400(Ma06_g24400),Ma07_g25300(Ma07_g25300),Ma08_g22060(Ma08_g22060),Ma11_g18170(Ma11_g18170)

## Sheet: cellular components
Category	GO.ID	Term	Up	Down	DEG	Total	Pvalue	FDR	Up_Gene	Down_Gene
CC	GO:0000502	proteasome complex	0	8	8	81	0.00348485	0.344961	-	Ma03_g04440(Ma03_g04440),Ma04_g01900(Ma04_g01900),Ma05_g26450(Ma05_g26450),Ma06_g13560(Ma06_g13560),Ma07_g09760(Ma07_g09760),Ma10_g17540(Ma10_g17540),Ma11_g06870(Ma11_g06870),Ma11_g13750(Ma11_g13750)
CC	GO:1905369	endopeptidase complex	0	8	8	81	0.00348485	0.344961	-	Ma03_g04440(Ma03_g04440),Ma04_g01900(Ma04_g01900),Ma05_g26450(Ma05_g26450),Ma06_g13560(Ma06_g13560),Ma07_g09760(Ma07_g09760),Ma10_g17540(Ma10_g17540),Ma11_g06870(Ma11_g06870),Ma11_g13750(Ma11_g13750)
CC	GO:0005839	proteasome core complex	0	5	5	34	0.00365223	0.344961	-	Ma04_g01900(Ma04_g01900),Ma05_g26450(Ma05_g26450),Ma10_g17540(Ma10_g17540),Ma11_g06870(Ma11_g06870),Ma11_g13750(Ma11_g13750)
CC	GO:0031306	intrinsic component of mitochondrial outer membrane	2	2	4	23	0.00499012	0.344961	Ma04_g08050(Ma04_g08050),Ma08_g29950(Ma08_g29950)	Ma03_g16610(Ma03_g16610),Ma06_g28660(Ma06_g28660)
CC	GO:0031307	integral component of mitochondrial outer membrane	2	2	4	23	0.00499012	0.344961	Ma04_g08050(Ma04_g08050),Ma08_g29950(Ma08_g29950)	Ma03_g16610(Ma03_g16610),Ma06_g28660(Ma06_g28660)
CC	GO:0005732	small nucleolar ribonucleoprotein complex	4	0	4	26	0.00783328	0.413088	Ma08_g02860(Ma08_g02860),Ma10_g09480(Ma10_g09480),Ma11_g00580(Ma11_g00580),Ma11_g16190(Ma11_g16190)	-
CC	GO:1905368	peptidase complex	0	8	8	94	0.00854032	0.413088	-	Ma03_g04440(Ma03_g04440),Ma04_g01900(Ma04_g01900),Ma05_g26450(Ma05_g26450),Ma06_g13560(Ma06_g13560),Ma07_g09760(Ma07_g09760),Ma10_g17540(Ma10_g17540),Ma11_g06870(Ma11_g06870),Ma11_g13750(Ma11_g13750)

## Sheet: molecular functions
Category	GO.ID	Term	Up	Down	DEG	Total	Pvalue	FDR	Up_Gene	Down_Gene
MF	GO:0019200	carbohydrate kinase activity	2	5	7	41	0.00016695	0.210101	Ma07_g02160(Ma07_g02160),Ma08_g29950(Ma08_g29950)	Ma03_g16610(Ma03_g16610),Ma06_g13970(Ma06_g13970),Ma07_g11340(Ma07_g11340),Ma07_g13520(Ma07_g13520),Ma11_g17680(Ma11_g17680)
MF	GO:0008519	ammonium transmembrane transporter activity	1	4	5	21	0.000290912	0.210101	Ma05_g31280(Ma05_g31280)	Ma01_g01260(Ma01_g01260),Ma11_g02330(Ma11_g02330),Ma11_g04350(Ma11_g04350),Ma11_g15780(Ma11_g15780)
MF	GO:0003747	translation release factor activity	0	3	3	7	0.000801456	0.232331	-	Ma08_g09650(Ma08_g09650),Ma11_g05690(Ma11_g05690),Ma11_g12280(Ma11_g12280)
MF	GO:0008079	translation termination factor activity	0	3	3	7	0.000801456	0.232331	-	Ma08_g09650(Ma08_g09650),Ma11_g05690(Ma11_g05690),Ma11_g12280(Ma11_g12280)
MF	GO:0004013	adenosylhomocysteinase activity	0	2	2	2	0.000857552	0.232331	-	Ma06_g08140(Ma06_g08140),Ma08_g16380(Ma08_g16380)
MF	GO:0016802	trialkylsulfonium hydrolase activity	0	2	2	2	0.000857552	0.232331	-	Ma06_g08140(Ma06_g08140),Ma08_g16380(Ma08_g16380)
MF	GO:0008690	3-deoxy-manno-octulosonate cytidylyltransferase activity	1	1	2	3	0.00252265	0.344961	Ma04_g08050(Ma04_g08050)	Ma06_g28660(Ma06_g28660)
MF	GO:0004396	hexokinase activity	1	3	4	21	0.0029288	0.344961	Ma08_g29950(Ma08_g29950)	Ma03_g16610(Ma03_g16610),Ma06_g13970(Ma06_g13970),Ma11_g17680(Ma11_g17680)
MF	GO:0008865	fructokinase activity	1	3	4	21	0.0029288	0.344961	Ma08_g29950(Ma08_g29950)	Ma03_g16610(Ma03_g16610),Ma06_g13970(Ma06_g13970),Ma11_g17680(Ma11_g17680)
MF	GO:0044183	protein folding chaperone	4	1	5	38	0.00477312	0.344961	Ma03_g26770(Ma03_g26770),Ma08_g04480(Ma08_g04480),Ma09_g20870(Ma09_g20870),Ma10_g09070(Ma10_g09070)	Ma08_g25360(Ma08_g25360)
MF	GO:0016905	myosin heavy chain kinase activity	2	0	2	4	0.00494745	0.344961	Ma03_g17810(Ma03_g17810),Ma09_g07320(Ma09_g07320)	-
MF	GO:0008443	phosphofructokinase activity	1	2	3	13	0.00574474	0.377928	Ma07_g02160(Ma07_g02160)	Ma07_g11340(Ma07_g11340),Ma07_g13520(Ma07_g13520)
MF	GO:0019887	protein kinase regulator activity	0	5	5	41	0.00663516	0.410219	-	Ma03_g11320(Ma03_g11320),Ma04_g31690(Ma04_g31690),Ma05_g24150(Ma05_g24150),Ma08_g00400(Ma08_g00400),Ma10_g15050(Ma10_g15050)
MF	GO:0090079	translation regulator activity, nucleic acid binding	0	6	6	58	0.00682905	0.412108	-	Ma03_g06740(Ma03_g06740),Ma03_g19410(Ma03_g19410),Ma05_g28870(Ma05_g28870),Ma08_g09650(Ma08_g09650),Ma11_g05690(Ma11_g05690),Ma11_g12280(Ma11_g12280)
MF	GO:0045159	myosin II binding	2	1	3	14	0.00715437	0.412108	Ma03_g17810(Ma03_g17810),Ma09_g07320(Ma09_g07320)	Ma05_g25100(Ma05_g25100)
MF	GO:0008047	enzyme activator activity	1	8	9	117	0.00742732	0.412651	Ma09_g27930(Ma09_g27930)	Ma02_g19350(Ma02_g19350),Ma03_g11320(Ma03_g11320),Ma03_g19410(Ma03_g19410),Ma04_g13150(Ma04_g13150),Ma04_g31690(Ma04_g31690),Ma08_g22060(Ma08_g22060),Ma10_g15050(Ma10_g15050),Ma11_g18170(Ma11_g18170)
MF	GO:0045182	translation regulator activity	0	6	6	61	0.00870943	0.413088	-	Ma03_g06740(Ma03_g06740),Ma03_g19410(Ma03_g19410),Ma05_g28870(Ma05_g28870),Ma08_g09650(Ma08_g09650),Ma11_g05690(Ma11_g05690),Ma11_g12280(Ma11_g12280)
MF	GO:0016538	cyclin-dependent protein serine/threonine kinase regulator activity	0	3	3	15	0.00875107	0.413088	-	Ma04_g31690(Ma04_g31690),Ma05_g24150(Ma05_g24150),Ma08_g00400(Ma08_g00400)
MF	GO:0005319	lipid transporter activity	1	4	5	44	0.00895441	0.413088	Ma09_g22560(Ma09_g22560)	Ma01_g03600(Ma01_g03600),Ma05_g22190(Ma05_g22190),Ma06_g24400(Ma06_g24400),Ma07_g25300(Ma07_g25300)
MF	GO:0051082	unfolded protein binding	4	2	6	62	0.0094113	0.418715	Ma03_g26770(Ma03_g26770),Ma08_g04480(Ma08_g04480),Ma09_g20870(Ma09_g20870),Ma10_g09070(Ma10_g09070)	Ma03_g25530(Ma03_g25530),Ma11_g23680(Ma11_g23680)
