# Supplementary material for: Transcriptome analysis provides insight into the regulatory mechanisms underlying pollen germination recovery at normal high ambient temperature in wild banana (Musa itinerans)
Source: Front Plant Sci. 2023 Sep 26;14:1255418. doi: 10.3389/fpls.2023.1255418 (PMC10562711; doi:10.3389/fpls.2023.1255418)
Supplement: Supplementary Table 3 — The information of top 20 KEGG pathways. [file Table_3.xlsx]

## Sheet: Sheet1
PathwayID	Pathway	Level1	Level2	Up_number	Down_number	DEG_number	total_number	Pvalue	FDR	Up_gene	Down_gene	URL
mus00020	Citrate cycle (TCA cycle)	Metabolism	Carbohydrate metabolism	1	7	8	67	0.00209663	0.116453	Ma05_g30930(Ma05_g30930)	Ma11_g04770(Ma11_g04770),Ma08_g17990(Ma08_g17990),Ma08_g15010(Ma08_g15010),Ma04_g16550(Ma04_g16550),Ma08_g06070(Ma08_g06070),Ma09_g30860(Ma09_g30860),Ma06_g04330(Ma06_g04330)	http://www.kegg.jp/kegg-bin/show_pathway?map00020/K00164%09%23FFFFFF,red/K01648%09%23FFFFFF,green/K01681%09%23FFFFFF,green/K00627%09%23FFFFFF,green/K01900%09%23FFFFFF,green/K00026%09%23FFFFFF,green/
mus03050	Proteasome	Genetic Information Processing	Folding, sorting and degradation	0	8	8	69	0.00253158	0.116453	-	Ma06_g13560(Ma06_g13560),Ma03_g04440(Ma03_g04440),Ma10_g17540(Ma10_g17540),Ma11_g13750(Ma11_g13750),Ma11_g06870(Ma11_g06870),Ma05_g26450(Ma05_g26450),Ma04_g01900(Ma04_g01900),Ma07_g09760(Ma07_g09760)	http://www.kegg.jp/kegg-bin/show_pathway?map03050/K03037%09%23FFFFFF,green/K03065%09%23FFFFFF,green/K03066%09%23FFFFFF,green/K02735%09%23FFFFFF,green/K02736%09%23FFFFFF,green/K02731%09%23FFFFFF,green/K02738%09%23FFFFFF,green/K02730%09%23FFFFFF,green/
mus00051	Fructose and mannose metabolism	Metabolism	Carbohydrate metabolism	2	7	9	92	0.00448124	0.137425	Ma08_g29950(Ma08_g29950),Ma07_g02160(Ma07_g02160)	Ma07_g11340(Ma07_g11340),Ma08_g07740(Ma08_g07740),Ma03_g16610(Ma03_g16610),Ma06_g13970(Ma06_g13970),Ma07_g13520(Ma07_g13520),Ma11_g17680(Ma11_g17680),Ma05_g30480(Ma05_g30480)	http://www.kegg.jp/kegg-bin/show_pathway?map00051/K00850%09%23FFFFFF,green/K00844%09%23FFFFFF,purple/K01103%09%23FFFFFF,green/K00847%09%23FFFFFF,green/K00895%09%23FFFFFF,red/K03841%09%23FFFFFF,green/
mus00010	Glycolysis / Gluconeogenesis	Metabolism	Carbohydrate metabolism	2	11	13	173	0.00710967	0.163522	Ma07_g02160(Ma07_g02160),Ma08_g29950(Ma08_g29950)	Ma08_g32440(Ma08_g32440),Ma08_g11500(Ma08_g11500),Ma03_g16610(Ma03_g16610),Ma07_g12740(Ma07_g12740),Ma07_g11340(Ma07_g11340),Ma07_g08070(Ma07_g08070),Ma08_g07740(Ma08_g07740),Ma05_g30490(Ma05_g30490),Ma08_g17990(Ma08_g17990),Ma07_g23360(Ma07_g23360),Ma07_g13520(Ma07_g13520)	http://www.kegg.jp/kegg-bin/show_pathway?map00010/K00627%09%23FFFFFF,green/K00128%09%23FFFFFF,green/K00850%09%23FFFFFF,green/K15633%09%23FFFFFF,green/K01810%09%23FFFFFF,green/K01568%09%23FFFFFF,green/K00844%09%23FFFFFF,purple/K03841%09%23FFFFFF,green/K15634%09%23FFFFFF,green/K00895%09%23FFFFFF,red/K01792%09%23FFFFFF,green/
mus00520	Amino sugar and nucleotide sugar metabolism	Metabolism	Carbohydrate metabolism	5	9	14	201	0.010148	0.186724	Ma03_g33030(Ma03_g33030),Ma08_g29950(Ma08_g29950),Ma04_g18460(Ma04_g18460),Ma03_g25420(Ma03_g25420),Ma01_g12030(Ma01_g12030)	Ma04_g03400(Ma04_g03400),Ma06_g25230(Ma06_g25230),Ma03_g31530(Ma03_g31530),Ma07_g08070(Ma07_g08070),Ma08_g04360(Ma08_g04360),Ma03_g16610(Ma03_g16610),Ma06_g13970(Ma06_g13970),Ma03_g16650(Ma03_g16650),Ma11_g17680(Ma11_g17680)	http://www.kegg.jp/kegg-bin/show_pathway?map00520/K00770%09%23FFFFFF,red/K10046%09%23FFFFFF,green/K08679%09%23FFFFFF,red/K12450%09%23FFFFFF,red/K00844%09%23FFFFFF,purple/K01784%09%23FFFFFF,purple/K00012%09%23FFFFFF,green/K01810%09%23FFFFFF,green/K00847%09%23FFFFFF,green/
mus00270	Cysteine and methionine metabolism	Metabolism	Amino acid metabolism	3	7	10	138	0.0215016	0.329691	Ma04_g34720(Ma04_g34720),Ma03_g28680(Ma03_g28680),Ma07_g00420(Ma07_g00420)	Ma06_g04330(Ma06_g04330),Ma01_g15110(Ma01_g15110),Ma06_g31540(Ma06_g31540),Ma06_g08140(Ma06_g08140),Ma04_g16550(Ma04_g16550),Ma08_g16380(Ma08_g16380),Ma07_g01550(Ma07_g01550)	http://www.kegg.jp/kegg-bin/show_pathway?map00270/K01251%09%23FFFFFF,green/K00547%09%23FFFFFF,green/K00026%09%23FFFFFF,green/K00558%09%23FFFFFF,red/K00549%09%23FFFFFF,green/K01739%09%23FFFFFF,green/K12524%09%23FFFFFF,red/
mus00052	Galactose metabolism	Metabolism	Carbohydrate metabolism	2	4	6	68	0.0298584	0.376714	Ma01_g12030(Ma01_g12030),Ma08_g29950(Ma08_g29950)	Ma03_g16650(Ma03_g16650),Ma07_g13520(Ma07_g13520),Ma03_g16610(Ma03_g16610),Ma07_g11340(Ma07_g11340)	http://www.kegg.jp/kegg-bin/show_pathway?map00052/K00850%09%23FFFFFF,green/K00844%09%23FFFFFF,purple/K01784%09%23FFFFFF,purple/
mus00071	Fatty acid degradation	Metabolism	Lipid metabolism	0	5	5	52	0.0332369	0.376714	-	Ma08_g11500(Ma08_g11500),Ma07_g07450(Ma07_g07450),Ma08_g18570(Ma08_g18570),Ma08_g24810(Ma08_g24810),Ma01_g06730(Ma01_g06730)	http://www.kegg.jp/kegg-bin/show_pathway?map00071/K01897%09%23FFFFFF,green/K00128%09%23FFFFFF,green/K00232%09%23FFFFFF,green/K20495%09%23FFFFFF,green/
mus00620	Pyruvate metabolism	Metabolism	Carbohydrate metabolism	0	8	8	112	0.040337	0.376714	-	Ma06_g04330(Ma06_g04330),Ma01_g14040(Ma01_g14040),Ma04_g09570(Ma04_g09570),Ma10_g18980(Ma10_g18980),Ma04_g16550(Ma04_g16550),Ma08_g17990(Ma08_g17990),Ma08_g11500(Ma08_g11500),Ma09_g29520(Ma09_g29520)	http://www.kegg.jp/kegg-bin/show_pathway?map00620/K01759%09%23FFFFFF,green/K00627%09%23FFFFFF,green/K01595%09%23FFFFFF,green/K00128%09%23FFFFFF,green/K11262%09%23FFFFFF,green/K00026%09%23FFFFFF,green/K01961%09%23FFFFFF,green/
mus00062	Fatty acid elongation	Metabolism	Lipid metabolism	0	5	5	55	0.0409471	0.376714	-	Ma10_g22730(Ma10_g22730),Ma08_g11220(Ma08_g11220),Ma06_g25850(Ma06_g25850),Ma08_g04050(Ma08_g04050),Ma08_g16000(Ma08_g16000)	http://www.kegg.jp/kegg-bin/show_pathway?map00062/K07512%09%23FFFFFF,green/K01068%09%23FFFFFF,green/K15397%09%23FFFFFF,green/K10703%09%23FFFFFF,green/
mus00640	Propanoate metabolism	Metabolism	Carbohydrate metabolism	0	4	4	43	0.0604704	0.461009	-	Ma10_g18980(Ma10_g18980),Ma05_g13820(Ma05_g13820),Ma04_g09570(Ma04_g09570),Ma08_g15010(Ma08_g15010)	http://www.kegg.jp/kegg-bin/show_pathway?map00640/K05605%09%23FFFFFF,green/K01900%09%23FFFFFF,green/K01961%09%23FFFFFF,green/K11262%09%23FFFFFF,green/
mus00909	Sesquiterpenoid and triterpenoid biosynthesis	Metabolism	Metabolism of terpenoids and polyketides	0	2	2	12	0.0626863	0.461009	-	Ma02_g14320(Ma02_g14320),Ma11_g11690(Ma11_g11690)	http://www.kegg.jp/kegg-bin/show_pathway?map00909/K00801%09%23FFFFFF,green/K15891%09%23FFFFFF,green/
mus00770	Pantothenate and CoA biosynthesis	Metabolism	Metabolism of cofactors and vitamins	1	2	3	27	0.0651426	0.461009	Ma06_g30380(Ma06_g30380)	Ma10_g21130(Ma10_g21130),Ma09_g27940(Ma09_g27940)	http://www.kegg.jp/kegg-bin/show_pathway?map00770/K09680%09%23FFFFFF,green/K01653%09%23FFFFFF,red/K01513%09%23FFFFFF,green/
mus01040	Biosynthesis of unsaturated fatty acids	Metabolism	Lipid metabolism	0	3	3	28	0.0711617	0.467634	-	Ma10_g22730(Ma10_g22730),Ma08_g11220(Ma08_g11220),Ma07_g07450(Ma07_g07450)	http://www.kegg.jp/kegg-bin/show_pathway?map01040/K01068%09%23FFFFFF,green/K10703%09%23FFFFFF,green/K00232%09%23FFFFFF,green/
mus03008	Ribosome biogenesis in eukaryotes	Genetic Information Processing	Translation	5	1	6	90	0.0914603	0.560956	Ma07_g17880(Ma07_g17880),Ma00_g00980(Ma00_g00980),Ma05_g07920(Ma05_g07920),Ma11_g16190(Ma11_g16190),Ma11_g00580(Ma11_g00580)	Ma04_g00740(Ma04_g00740)	http://www.kegg.jp/kegg-bin/show_pathway?map03008/K14564%09%23FFFFFF,red/K14548%09%23FFFFFF,red/K11131%09%23FFFFFF,red/K06943%09%23FFFFFF,red/K07936%09%23FFFFFF,green/
mus04145	Phagosome	Cellular Processes	Transport and catabolism	1	7	8	136	0.0995673	0.56214	Ma07_g19240(Ma07_g19240)	Ma05_g04470(Ma05_g04470),Ma02_g18490(Ma02_g18490),Ma09_g09600(Ma09_g09600),Ma11_g23680(Ma11_g23680),Ma03_g25530(Ma03_g25530),Ma04_g04870(Ma04_g04870),Ma06_g06200(Ma06_g06200)	http://www.kegg.jp/kegg-bin/show_pathway?map04145/K04392%09%23FFFFFF,green/K07375%09%23FFFFFF,green/K08057%09%23FFFFFF,green/K07889%09%23FFFFFF,green/K07342%09%23FFFFFF,green/K07374%09%23FFFFFF,red/K02147%09%23FFFFFF,green/
mus00061	Fatty acid biosynthesis	Metabolism	Lipid metabolism	0	4	4	52	0.104725	0.56214	-	Ma01_g06730(Ma01_g06730),Ma10_g18980(Ma10_g18980),Ma08_g24810(Ma08_g24810),Ma04_g09570(Ma04_g09570)	http://www.kegg.jp/kegg-bin/show_pathway?map00061/K01897%09%23FFFFFF,green/K11262%09%23FFFFFF,green/K01961%09%23FFFFFF,green/
mus00053	Ascorbate and aldarate metabolism	Metabolism	Carbohydrate metabolism	0	5	5	75	0.117722	0.56214	-	Ma08_g04360(Ma08_g04360),Ma08_g11500(Ma08_g11500),Ma06_g25230(Ma06_g25230),Ma03_g31530(Ma03_g31530),Ma04_g03400(Ma04_g03400)	http://www.kegg.jp/kegg-bin/show_pathway?map00053/K00128%09%23FFFFFF,green/K00012%09%23FFFFFF,green/K10046%09%23FFFFFF,green/
mus04146	Peroxisome	Cellular Processes	Transport and catabolism	1	5	6	97	0.11954	0.56214	Ma04_g34180(Ma04_g34180)	Ma07_g07450(Ma07_g07450),Ma05_g15800(Ma05_g15800),Ma03_g01840(Ma03_g01840),Ma08_g24810(Ma08_g24810),Ma01_g06730(Ma01_g06730)	http://www.kegg.jp/kegg-bin/show_pathway?map04146/K11517%09%23FFFFFF,green/K00232%09%23FFFFFF,green/K03781%09%23FFFFFF,green/K13348%09%23FFFFFF,red/K01897%09%23FFFFFF,green/
mus04120	Ubiquitin mediated proteolysis	Genetic Information Processing	Folding, sorting and degradation	1	8	9	166	0.122204	0.56214	Ma01_g12970(Ma01_g12970)	Ma09_g29800(Ma09_g29800),Ma06_g14070(Ma06_g14070),Ma03_g05450(Ma03_g05450),Ma01_g19780(Ma01_g19780),Ma10_g31280(Ma10_g31280),Ma01_g19370(Ma01_g19370),Ma09_g28520(Ma09_g28520),Ma05_g06860(Ma05_g06860)	http://www.kegg.jp/kegg-bin/show_pathway?map04120/K10576%09%23FFFFFF,green/K03352%09%23FFFFFF,green/K06689%09%23FFFFFF,green/K10577%09%23FFFFFF,green/K10588%09%23FFFFFF,green/K03350%09%23FFFFFF,red/K03363%09%23FFFFFF,green/K03364%09%23FFFFFF,green/K10581%09%23FFFFFF,green/
