# Supplementary material for: Transcriptome analysis provides insight into the regulatory mechanisms underlying pollen germination recovery at normal high ambient temperature in wild banana (Musa itinerans)
Source: Front Plant Sci. 2023 Sep 26;14:1255418. doi: 10.3389/fpls.2023.1255418 (PMC10562711; doi:10.3389/fpls.2023.1255418)
Supplement: Supplementary Table 4 — The FPKM of DEGs in this study. [file Table_4.xlsx]

## Sheet: Sheet1
Glycolysis / Gluconeogenesis
UP	CK1	CK2	CK3	T1	T2	T3
Ma07_g02160	1.45774	1.22024	1.14886	2.60196	1.00571	2.76828
Ma08_g29950	0.795635	0.43658	1.84814	2.85142	2.15593	1.11577
Down	CK1	CK2	CK3	T1	T2	T3
Ma08_g32440	0.222235	1.13234	0.430182	0	0	0
Ma08_g11500	2.35837	5.15828	3.47394	0.389802	0	0.0873873
Ma03_g16610	12.9853	14.6918	9.6338	4.05692	3.87122	5.47572
Ma07_g12740	16.905	18.5339	34.2578	6.22179	12.0556	8.76747
Ma07_g11340	1.04072	0.795409	2.1757	0.044079	0.0591297	0.27669
Ma07_g08070	0.994544	2.07765	1.15509	0.12637	0.282531	0.11332
Ma08_g07740	3.50937	4.72061	5.70622	1.42691	1.67486	1.91934
Ma05_g30490	4.07142	2.90428	1.83235	0.0431105	0	0
Ma08_g17990	1.92318	2.00242	1.65095	0.991627	0.285046	0.412855
Ma07_g23360	10.551	20.2982	16.2626	6.68232	3.24945	5.01853
Ma07_g13520	2.05502	3.86113	3.87848	1.03359	0.72974	0.195127
Amino sugar and nucleotide sugar metabolism
UP	CK1	CK2	CK3	T1	T2	T3
Ma03_g33030	1.31862	1.16847	1.59806	3.49664	2.54072	3.91945
Ma08_g29950	0.795635	0.43658	1.84814	2.85142	2.15593	1.11577
Ma04_g18460	3.73219	4.82368	2.80167	7.01695	6.98208	14.1751
Ma03_g25420	0.220647	0.140531	0.0640663	0.303724	0.689497	1.25705
Ma01_g12030	4.72232	6.61687	4.60316	10.9291	7.66581	8.32725
Down	CK1	CK2	CK3	T1	T2	T3
Ma04_g03400	1.39492	1.81951	0.712841	0.425381	0	0.0423838
Ma06_g25230	1.6613	2.72343	4.36228	0.305926	0.492461	0.384068
Ma03_g31530	4.39646	3.8792	1.93038	0.590418	0.731091	0.570175
Ma07_g08070	0.994544	2.07765	1.15509	0.12637	0.282531	0.11332
Ma08_g04360	3.26964	7.20784	7.4399	2.14791	1.51648	2.02748
Ma03_g16610	12.9853	14.6918	9.6338	4.05692	3.87122	5.47572
Ma06_g13970	0.243145	1.0737	0.941317	0	0	0
Ma03_g16650	3.65604	4.86234	10.1478	1.99467	2.74616	1.83576
Ma11_g17680	0.345986	11.8995	4.9225	0.0732699	0	0
Fructose and mannose metabolism
UP	CK1	CK2	CK3	T1	T2	T3
Ma08_g29950	0.795635	0.43658	1.84814	2.85142	2.15593	1.11577
Ma07_g02160	1.45774	1.22024	1.14886	2.60196	1.00571	2.76828
Down	CK1	CK2	CK3	T1	T2	T3
Ma07_g11340	1.04072	0.795409	2.1757	0.044079	0.0591297	0.27669
Ma08_g07740	3.50937	4.72061	5.70622	1.42691	1.67486	1.91934
Ma03_g16610	12.9853	14.6918	9.6338	4.05692	3.87122	5.47572
Ma06_g13970	0.243145	1.0737	0.941317	0	0	0
Ma07_g13520	2.05502	3.86113	3.87848	1.03359	0.72974	0.195127
Ma11_g17680	0.345986	11.8995	4.9225	0.0732699	0	0
Ma05_g30480	3.04182	3.21181	3.19233	0.962376	0.832889	1.33625
Galactose metabolism
UP	CK1	CK2	CK3	T1	T2	T3
Ma01_g12030	4.72232	6.61687	4.60316	10.9291	7.66581	8.32725
Ma08_g29950	0.795635	0.43658	1.84814	2.85142	2.15593	1.11577
Down	CK1	CK2	CK3	T1	T2	T3
Ma03_g16650	3.65604	4.86234	10.1478	1.99467	2.74616	1.83576
Ma07_g13520	2.05502	3.86113	3.87848	1.03359	0.72974	0.195127
Ma03_g16610	12.9853	14.6918	9.6338	4.05692	3.87122	5.47572
Ma07_g11340	1.04072	0.795409	2.1757	0.044079	0.0591297	0.27669
Cysteine and methionine metabolism
UP	CK1	CK2	CK3	T1	T2	T3
Ma04_g34720	0.559531	1.1087	0.505442	2.05387	1.27161	0.991727
Ma03_g28680	0.522972	0.15988	0.455544	1.12965	0.415985	1.46984
Ma07_g00420	0.711304	0.475685	0.464696	1.16741	0.580944	1.30013
Down	CK1	CK2	CK3	T1	T2	T3
Ma06_g04330	3.79968	9.05467	7.8077	3.66432	0.797107	2.48664
Ma01_g15110	3.67864	7.28012	4.82975	2.57419	0.605815	1.13393
Ma06_g31540	3.71973	3.86794	8.2877	2.12205	2.6741	0.922627
Ma06_g08140	141.744	142.282	107.113	28.4685	15.4786	28.0731
Ma04_g16550	2.86933	4.16668	4.24895	1.57987	0.326048	1.5257
Ma08_g16380	37.8956	47.4479	19.5613	7.28859	5.06199	7.37031
Ma07_g01550	5.60671	5.46688	5.24689	1.64007	1.87922	1.6239
Citrate cycle (TCA cycle)
UP	CK1	CK2	CK3	T1	T2	T3
Ma05_g30930	6.00174	4.23886	3.72684	8.73338	4.89548	10.111
Down	CK1	CK2	CK3	T1	T2	T3
Ma11_g04770	3.02598	6.50987	3.79338	2.11571	1.20074	1.27698
Ma08_g17990	1.92318	2.00242	1.65095	0.991627	0.285046	0.412855
Ma08_g15010	18.8866	18.072	17.697	7.70099	4.51049	6.51669
Ma04_g16550	2.86933	4.16668	4.24895	1.57987	0.326048	1.5257
Ma08_g06070	1.60351	5.05072	3.13215	0.987862	1.0767	0.885851
Ma09_g30860	1.04845	3.14242	1.39677	0.600791	0.560648
Ma06_g04330	3.79968	9.05467	7.8077	3.66432	0.797107	2.48664
Fatty acid degradation
Down	CK1	CK2	CK3	T1	T2	T3
Ma08_g11500	2.35837	5.15828	3.47394	0.389802	0	0.0873873
Ma07_g07450	1.85659	4.6639	4.71376	0.512039	0.735937	1.37749
Ma08_g18570	0.95109	2.05244	0.844709	0.0473914	0	0.127493
Ma08_g24810	2.99578	3.30725	3.3344	1.2336	0.472802	0.568907
Ma01_g06730	0.180388	0.919121	0.460916	0.152804	0	0
Fatty acid elongation
Down	CK1	CK2	CK3	T1	T2	T3
Ma10_g22730	7.00535	8.48938	15.9425	4.00955	1.50601	2.58876
Ma08_g11220	1.17458	2.70889	1.00519	0.209467	0	0.234795
Ma06_g25850	2.79092	26.2173	7.30799	0.902675	0	0
Ma08_g04050	0.171616	1.45738	0.863717	0	0	0
Ma08_g16000	15.1618	12.073	18.1007	1.19473	3.28546	1.76773
Biosynthesis of unsaturated fatty acids
Down	CK1	CK2	CK3	T1	T2	T3
Ma10_g22730	7.00535	8.48938	15.9425	4.00955	1.50601	2.58876
Ma08_g11220	1.17458	2.70889	1.00519	0.209467	0	0.234795
Ma07_g07450	1.85659	4.6639	4.71376	0.512039	0.735937	1.37749
Fatty acid biosynthesis
Down	CK1	CK2	CK3	T1	T2	T3
Ma01_g06730	0.180388	0.919121	0.460916	0.152804	0	0
Ma10_g18980	1.38915	0.986637	1.82525	0.701282	0.0478339	0.362396
Ma08_g24810	2.99578	3.30725	3.3344	1.2336	0.472802	0.568907
Ma04_g09570	3.65164	5.8476	3.817	1.59081	0.889165	1.42654
Sesquiterpenoid and triterpenoid biosynthesis
Down	CK1	CK2	CK3	T1	T2	T3
Ma02_g14320	2.08726	4.11681	2.50239	1.1407	0.535567	0.920615
Ma11_g11690	11.2103	6.60885	9.79187	2.66833	2.00027	2.18165

## Sheet: Sheet2
FPKM for transcriptome validation genes
Gene_ID	CK1	CK2	CK3	T1	T2	T3
Ma04_g30160	17.5471	17.8046	16.0063	4.46555	2.4817	4.97691
Ma08_g08260	1.29834	1.02906	1.2985	0.977608	0.204908	0.520514
Ma09_g01640	0.492456	0.401469	0.428963	0.667443	0.811403	1.01
Ma09_g07920	114.26	121.684	121.981	199.367	212.258	172.98
Ma10_g07950	1.10519	0.981856	0.789907	0.14403	0.22541	0.452048
Ma10_g09480	1.96757	0.86705	1.91462	2.2523	1.99409	3.91825
FPKM values for DEGs of the hormone and MAPK signaling pathways
Gene_ID	CK1	CK2	CK3	T1	T2	T3
Ma02_g23650	17.124	18.8462	17.8994	7.25276	3.89168	8.58501
Ma03_g05850	0.554406	1.45277	0	0	0	0
Ma03_g09300	3.52841	4.5088	3.25237	1.99258	1.27283	1.02104
Ma03_g31200	0.142097	0	0	0.300921	1.13028	0.377785
Ma04_g07200	0.575317	1.36798	0.167047	0	0	0.0364181
Ma04_g37200	1.46023	2.74462	1.92208	0.934579	0.368732	0.616227
Ma05_g20730	0.15133	0.308424	0.395455	0	0	0
Ma05_g31380	0.969265	2.0413	0.225146	0.16421	0	0
Ma06_g06840	0.114411	0.466361	0.265759	0	0	0
Ma06_g17470	0.279005	1.1779	1.1573	0.101289	0.181165	0.0605529
Ma07_g15950	2.95075	3.78295	1.87937	0.725673	0	0
Ma08_g22320	0.279307	0.806446	0.756921	0	0.105794	0.0353608
Ma08_g32650	0.227077	0	0.395599	0.961767	2.06426	0.86245
Ma09_g10330	0.193194	9.94215	1.57066	0	0	0
Ma09_g13510	21.363	22.7461	23.6989	7.70916	7.29344	6.54923
Ma06_g09230	6.07093	6.83779	3.19147	9.41907	8.20561	9.36871
Ma04_g03880	1.9677	5.34714	3.94739	1.16171	0.542045	1.58527
Ma05_g15800	1.84956	4.54568	4.92806	1.6589	0.741775	1.28098
The FPKM of genes involved in the recovery of pollen germination
Gene_ID	CK1	CK2	CK3	T1	T2	T3
Ma08_g02860	1.01712	0.327315	1.11914	2.04061	1.88574	2.23652
Ma10_g09480	1.96757	0.86705	1.91462	2.2523	1.99409	3.91825
Ma04_g08050	0.242956	0	0	1.02902	3.03684	0.738209
Ma09_g07920	114.26	121.684	121.981	199.367	212.258	172.98
Ma09_g01640	0.492456	0.401469	0.428963	0.667443	0.811403	1.01
Ma03_g04440	7.97451	11.9045	13.5677	2.72574	6.518	3.87894
Ma04_g30160	17.5471	17.8046	16.0063	4.46555	2.4817	4.97691
Ma05_g01550	2.38456	2.3124	3.17151	0.814485	0.305925	1.11017
Ma05_g18400	8.06528	9.60981	8.50255	3.57365	1.69195	3.58163
Ma06_g22410	4.18976	3.6784	3.36883	1.69264	0.878937	1.37096
Ma06_g28660	6.02428	8.66192	6.9009	4.0545	2.5319	1.81791
Ma08_g04720	6.34756	6.36525	7.29379	3.17467	2.14851	2.7186
Ma08_g18570	0.95109	2.05244	0.844709	0.0473914	0	0.127493
Ma08_g27730	0	6.45754	1.64859	0.0429427	0	0
Ma09_g04790	0.785393	2.50111	0.494095	0.249486	0	0.0248581
Ma09_g23550	158.768	115.295	105.987	62.7778	30.9551	54.0672
Ma09_g24370	7.13302	5.577	5.57059	2.23981	1.74686	2.84929
Ma10_g04000	3.41074	3.62905	7.10708	1.44459	0.911929	1.37162
Ma10_g07950	1.10519	0.981856	0.789907	0.14403	0.22541	0.452048
Ma11_g10400	4.4542	2.13984	4.28638	0.269506	0	0.145005
Ma11_g10840	0.879345	1.95033	0.480609	0.262899	0.23511	0.0785835
Ma11_g14300	5.20474	7.52517	8.26655	2.90156	1.92087	3.21017
Ma11_g19150	16.5671	17.2105	12.0493	7.15314	3.88392	5.74248
Ma11_g21240	0.974665	1.24154	0.91975	0.0516015	0.346104	0.0462729
The FPKM of MYBs involved in the recovery of pollen germination
Gene_ID	CK1	CK2	CK3	T1	T2	T3
Ma01_g01960	1.3201	0.917216	1.46351	0.355804	0.136369	0.227901
Ma01_g19370	0.905021	1.61396	0.963521	0.0638858	0	0.343732
Ma03_g15540	1.05507	1.72679	1.74525	0.216663	0.363303	0.485723
Ma04_g24060	0.26886	0.182655	0.104087	0.455495	0.661943	0.782879
Ma04_g28610	9.13215	9.05794	11.5491	1.65028	3.8741	1.54153
Ma06_g03670	1.3083	0.888817	1.71431	1.93233	2.02033	2.49725
Ma07_g25300	1.32129	0.438382	1.42752	0.182203	0.349165	0.140046
Ma08_g01350	0.589971	1.60323	0.837476	0.0555284	0.148977	0.248971
Ma08_g22930	0.312864	0.683193	0.207639	1.36297	1.67599	0.611112
Ma09_g03970	7.16737	9.96606	15.4818	2.72361	4.7192	3.51088
Ma09_g15850	1.10685	2.66944	2.61389	0.531304	0.545019	0.140129
Ma10_g29310	1.50123	3.2782	2.86443	0.908336	0.121849	0.488722
Ma11_g00580	3.17887	3.19034	2.46134	6.89512	4.59736	5.01233
Ma11_g12810	0.173137	0.617521	2.01085	0	0	0
