# Supplementary material for: Transcriptome analysis provides insight into the regulatory mechanisms underlying pollen germination recovery at normal high ambient temperature in wild banana (Musa itinerans)
Source: Front Plant Sci. 2023 Sep 26;14:1255418. doi: 10.3389/fpls.2023.1255418 (PMC10562711; doi:10.3389/fpls.2023.1255418)
Supplement: Supplementary Table 5 — The information of DEGs related to the recovery of pollen germination. [file Table_5.xlsx]

## Sheet: Sheet1
The DEGs related to the recovery of pollen germination in the GO pathway
Category	GO.ID	Term	Up	Down	DEG	Total	Pvalue	FDR	Up_Gene	Down_Gene
BP	GO:0048544	recognition of pollen	2	1	3	12	0.00458066	0.344961	Ma08_g02860 ,Ma10_g09480	Ma08_g04720
BP	GO:0060321	acceptance of pollen	2	1	3	12	0.00458066	0.344961	Ma08_g02860 ,Ma10_g09480	Ma08_g04720
BP	GO:0009875	pollen-pistil interaction	2	1	3	23	0.0290401	0.508695	Ma08_g02860 ,Ma10_g09480	Ma08_g04720
CC	GO:0090406	pollen tube	0	6	6	79	0.0352227	0.508695	-	Ma04_g30160 ,Ma05_g01550 ,Ma06_g22410 ,Ma09_g23550 ,Ma11_g14300 ,Ma11_g19150
BP	GO:0010584	pollen exine formation	0	3	3	29	0.0526927	0.508695	-	Ma08_g18570 ,Ma10_g07950 ,Ma11_g21240
BP	GO:0009860	pollen tube growth	2	7	9	170	0.0645166	0.523565	Ma04_g08050 ,Ma09_g07920	Ma04_g30160 ,Ma05_g01550 ,Ma06_g22410 ,Ma06_g28660 ,Ma09_g23550 ,Ma11_g10840 ,Ma11_g14300
BP	GO:0010483	pollen tube reception	0	2	2	21	0 26051017157048	0.577605	-	Ma09_g04790 ,Ma09_g24370
BP	GO:0010208	pollen wall assembly	0	3	3	44	0 39329122471172	0.577605	-	Ma08_g18570 ,Ma10_g07950 ,Ma11_g21240
BP	GO:0048868	pollen tube development	2	7	9	215	0 84750865865413	0.613269	Ma04_g08050 ,Ma09_g07920	Ma04_g30160 ,Ma05_g01550 ,Ma06_g22410 ,Ma06_g28660 ,Ma09_g23550 ,Ma11_g10840 ,Ma11_g14300
BP	GO:0080110	sporopollenin biosynthetic process	0	1	1	7	0 88925944672155	0.613269	-	Ma08_g18570
BP	GO:0048235	pollen sperm cell differentiation	0	2	2	37	0.297875	0.694235	-	Ma04_g30160 ,Ma08_g27730
BP	GO:0009555	pollen development	2	12	14	408	0.317475	0.710802	Ma04_g08050 ,Ma09_g01640	Ma03_g04440 ,Ma04_g30160 ,Ma05_g01550 ,Ma05_g18400 ,Ma06_g28660 ,Ma08_g18570 ,Ma08_g27730 ,Ma10_g04000 ,Ma10_g07950 ,Ma11_g10400 ,Ma11_g10840 ,Ma11_g21240
CC	GO:0090404	pollen tube tip	0	1	1	15	0.37564	0.743609	-	Ma11_g19150
BP	GO:0009846	pollen germination	0	3	3	79	0.412806	0.756487	-	Ma06_g22410 ,Ma09_g23550 ,Ma11_g14300
BP	GO:0080092	regulation of pollen tube growth	0	2	2	52	0.455832	0.779718	-	Ma04_g30160 ,Ma09_g23550
BP	GO:0010183	pollen tube guidance	0	1	1	36	0.659749	0.876379	-	Ma11_g10840

## Sheet: Sheet2
The information of DEGs related to the recovery of pollen germination
id	baseMean	baseMean_CK	baseMean_T	foldChange(T/CK)(T/CK)	log2FoldChange	pval	padj	Chromosome	Start Site	End Site	Direction	Length	Name	GO	KEGG	NR
Ma08_g02860	28.3677	13.6846	43.0508	3.14592	1.65348	0.00555832	0.248081	chr08	2151647	2159241	-	1947	Ma08_g02860	GO:0000003;GO:0000151;GO:0003006;GO:0003674;GO:0003676;GO:0003723;GO:0005488;GO:0005575;GO:0005622;GO:0005623;GO:0005634;GO:0005730;GO:0005732;GO:0006139;GO:0006364;GO:0006396;GO:0006725;GO:0006807;GO:0007154;GO:0007275;GO:0008037;GO:0008150;GO:0008152;GO:0009553;GO:0009790;GO:0009791;GO:0009793;GO:0009856;GO:0009875;GO:0009987;GO:0010154;GO:0010467;GO:0016070;GO:0016072;GO:0022414;GO:0022613;GO:…	K14793	gi|695049154|ref|XP_009412506.1| PREDICTED: U3 small nucleolar RNA-interacting protein 2-like isoform X1 [Musa acuminata subsp. malaccensis]
Ma10_g09480	42.2496	26.756	57.7433	2.15814	1.10979	0.030962	0.569041	chr10	23633062	23637947	-	1960	Ma10_g09480	GO:0000003;GO:0000151;GO:0003006;GO:0003674;GO:0003676;GO:0003723;GO:0005488;GO:0005575;GO:0005622;GO:0005623;GO:0005634;GO:0005730;GO:0005732;GO:0006139;GO:0006364;GO:0006396;GO:0006725;GO:0006807;GO:0007154;GO:0007275;GO:0008037;GO:0008150;GO:0008152;GO:0009553;GO:0009790;GO:0009791;GO:0009793;GO:0009856;GO:0009875;GO:0009987;GO:0010154;GO:0010467;GO:0016070;GO:0016072;GO:0022414;GO:0022613;GO:…	K14793	gi|695064309|ref|XP_009420694.1| PREDICTED: U3 small nucleolar RNA-interacting protein 2-like [Musa acuminata subsp. malaccensis]
Ma04_g08050	3.89586	0.320177	7.47154	23.3356	4.54446	0.0417159	0.644357	chr04	5780109	5782937	+	429	Ma04_g08050	GO:0000003;GO:0000902;GO:0000904;GO:0003006;GO:0003674;GO:0003824;GO:0005575;GO:0005622;GO:0005623;GO:0005737;GO:0005739;GO:0005740;GO:0005741;GO:0006139;GO:0006725;GO:0006793;GO:0006807;GO:0007275;GO:0008150;GO:0008152;GO:0008690;GO:0009058;GO:0009225;GO:0009226;GO:0009555;GO:0009653;GO:0009826;GO:0009856;GO:0009860;GO:0009932;GO:0009987;GO:0016020;GO:0016021;GO:0016043;GO:0016049;GO:0016740;GO:…	-	gi|743795310|ref|XP_010924427.1| PREDICTED: 3-deoxy-manno-octulosonate cytidylyltransferase, mitochondrial-like [Elaeis guineensis]
Ma09_g07920	1838.09	1216.7	2459.49	2.02145	1.01539	2.54746e-06	0.00128738	chr09	5206663	5207836	+	1174	Ma09_g07920	GO:0000003;GO:0000902;GO:0000904;GO:0003006;GO:0003674;GO:0003824;GO:0008150;GO:0008152;GO:0009056;GO:0009653;GO:0009826;GO:0009856;GO:0009860;GO:0009932;GO:0009987;GO:0016043;GO:0016049;GO:0016787;GO:0016788;GO:0022414;GO:0030154;GO:0032501;GO:0032502;GO:0032989;GO:0040007;GO:0044706;GO:0048468;GO:0048588;GO:0048589;GO:0048856;GO:0048868;GO:0048869;GO:0051704;GO:0052689;GO:0060560;GO:0071840	-	gi|695057403|ref|XP_009416972.1| PREDICTED: probable carboxylesterase 18 [Musa acuminata subsp. malaccensis]
Ma09_g01640	27.1502	16.2677	38.0326	2.33793	1.22523	0.0420028	0.64464	chr09	1208311	1216508	-	4233	Ma09_g01640	GO:0000003;GO:0000226;GO:0000280;GO:0000910;GO:0003674;GO:0003774;GO:0003777;GO:0003824;GO:0005575;GO:0005622;GO:0005623;GO:0005737;GO:0005856;GO:0005871;GO:0005875;GO:0006928;GO:0006996;GO:0007010;GO:0007017;GO:0007018;GO:0007049;GO:0007112;GO:0007140;GO:0007275;GO:0007276;GO:0008150;GO:0008574;GO:0009524;GO:0009555;GO:0009987;GO:0015630;GO:0016043;GO:0016462;GO:0016787;GO:0016817;GO:0016818;GO:…	K10400	gi|695055515|ref|XP_009415942.1| PREDICTED: kinesin-like protein KIN12B [Musa acuminata subsp. malaccensis]
Ma03_g04440	106.856	142.748	70.9643	0.497128	-1.00831	0.00209503	0.151683	chr03	2895924	2900878	-	1490	Ma03_g04440	GO:0000502;GO:0003674;GO:0003824;GO:0005488;GO:0005515;GO:0005575;GO:0005622;GO:0005623;GO:0005634;GO:0005737;GO:0005829;GO:0005838;GO:0006355;GO:0006357;GO:0006508;GO:0006511;GO:0006807;GO:0006950;GO:0007275;GO:0008134;GO:0008150;GO:0008152;GO:0008540;GO:0009056;GO:0009057;GO:0009553;GO:0009555;GO:0009889;GO:0009891;GO:0009893;GO:0009894;GO:0009896;GO:0009987;GO:0010033;GO:0010243;GO:0010468;GO:…	K03065	gi|695007994|ref|XP_009390568.1| PREDICTED: 26S protease regulatory subunit 6A homolog [Musa acuminata subsp. malaccensis]
Ma04_g30160	132.864	206.752	58.9757	0.285248	-1.80971	1.24318e-07	9.8165e-05	chr04	30889022	30891484	-	1384	Ma04_g30160	GO:0000003;GO:0000981;GO:0000988;GO:0000989;GO:0001067;GO:0001076;GO:0001101;GO:0001134;GO:0001135;GO:0001558;GO:0003006;GO:0003674;GO:0003676;GO:0003677;GO:0003700;GO:0005488;GO:0005575;GO:0005622;GO:0005623;GO:0005634;GO:0006355;GO:0006357;GO:0006996;GO:0007033;GO:0007154;GO:0007165;GO:0007275;GO:0007276;GO:0008150;GO:0009555;GO:0009719;GO:0009725;GO:0009739;GO:0009740;GO:0009755;GO:0009787;GO:…	K09422	gi|695023558|ref|XP_009398956.1| PREDICTED: myb-related protein P-like [Musa acuminata subsp. malaccensis]
Ma05_g01550	41.3998	61.1718	21.6279	0.353561	-1.49997	0.00541286	0.245762	chr05	941496	951360	-	2710	Ma05_g01550	GO:0000003;GO:0000271;GO:0000902;GO:0000904;GO:0003006;GO:0003674;GO:0003824;GO:0005575;GO:0005622;GO:0005623;GO:0005737;GO:0005794;GO:0005975;GO:0005976;GO:0007275;GO:0008150;GO:0008152;GO:0008194;GO:0009058;GO:0009059;GO:0009555;GO:0009653;GO:0009664;GO:0009826;GO:0009832;GO:0009856;GO:0009860;GO:0009932;GO:0009987;GO:0010383;GO:0010393;GO:0012505;GO:0016043;GO:0016049;GO:0016051;GO:0016740;GO:…	K20867	gi|695023856|ref|XP_009399119.1| PREDICTED: probable galacturonosyltransferase 13 isoform X1 [Musa acuminata subsp. malaccensis]
Ma05_g18400	90.2851	127.607	52.9633	0.415051	-1.26864	0.00114299	0.104183	chr05	23798028	23799964	-	1680	Ma05_g18400	GO:0000302;GO:0003674;GO:0003824;GO:0004553;GO:0004564;GO:0004575;GO:0005575;GO:0005622;GO:0005623;GO:0005634;GO:0005737;GO:0005829;GO:0005886;GO:0005975;GO:0005984;GO:0005985;GO:0005987;GO:0006082;GO:0006520;GO:0006807;GO:0006950;GO:0006979;GO:0007275;GO:0008150;GO:0008152;GO:0009056;GO:0009311;GO:0009313;GO:0009555;GO:0009636;GO:0009653;GO:0009791;GO:0009987;GO:0010015;GO:0010035;GO:0010101;GO:…	-	gi|695027552|ref|XP_009401124.1| PREDICTED: alkaline/neutral invertase CINV2-like [Musa acuminata subsp. malaccensis]
Ma06_g22410	37.8136	52.971	22.6562	0.42771	-1.2253	0.0245752	0.511925	chr06	17948093	17956094	-	1617	Ma06_g22410	GO:0000003;GO:0000217;GO:0000400;GO:0000902;GO:0000904;GO:0001067;GO:0003006;GO:0003674;GO:0003676;GO:0003677;GO:0003700;GO:0005488;GO:0005515;GO:0005575;GO:0005623;GO:0006082;GO:0006355;GO:0006790;GO:0006807;GO:0008134;GO:0008150;GO:0008152;GO:0009653;GO:0009826;GO:0009846;GO:0009856;GO:0009860;GO:0009889;GO:0009932;GO:0009987;GO:0010468;GO:0010556;GO:0016043;GO:0016049;GO:0016143;GO:0019219;GO:…	-	gi|695036189|ref|XP_009405540.1| PREDICTED: high mobility group B protein 9-like [Musa acuminata subsp. malaccensis] &gt;gi|695036191|ref|XP_009405541.1| PREDICTED: high mobility group B protein 9-like [Musa acuminata subsp. malaccensis]
Ma06_g28660	58.3196	79.1281	37.5112	0.474057	-1.07687	0.0137654	0.395703	chr06	30292213	30296985	-	1263	Ma06_g28660	GO:0000003;GO:0000902;GO:0000904;GO:0003006;GO:0003674;GO:0003824;GO:0005575;GO:0005622;GO:0005623;GO:0005737;GO:0005739;GO:0005740;GO:0005741;GO:0006139;GO:0006725;GO:0006793;GO:0006807;GO:0007275;GO:0008150;GO:0008152;GO:0008690;GO:0009058;GO:0009225;GO:0009226;GO:0009555;GO:0009653;GO:0009826;GO:0009856;GO:0009860;GO:0009932;GO:0009987;GO:0016020;GO:0016021;GO:0016043;GO:0016049;GO:0016740;GO:…	K00979	gi|695037520|ref|XP_009406254.1| PREDICTED: 3-deoxy-manno-octulosonate cytidylyltransferase, mitochondrial-like [Musa acuminata subsp. malaccensis]
Ma08_g04720	133.363	178.209	88.5167	0.496702	-1.00955	0.00232248	0.159468	chr08	3275177	3292462	-	3087	Ma08_g04720	GO:0000003;GO:0000145;GO:0003674;GO:0005488;GO:0005515;GO:0005543;GO:0005546;GO:0005575;GO:0005576;GO:0005615;GO:0005622;GO:0005623;GO:0005737;GO:0005829;GO:0005886;GO:0005938;GO:0006810;GO:0006887;GO:0006892;GO:0006893;GO:0007154;GO:0008037;GO:0008104;GO:0008150;GO:0008289;GO:0009856;GO:0009875;GO:0009987;GO:0016020;GO:0016192;GO:0017016;GO:0017048;GO:0017049;GO:0019899;GO:0022414;GO:0031267;GO:…	K19983	gi|695048780|ref|XP_009412305.1| PREDICTED: exocyst complex component SEC3A-like [Musa acuminata subsp. malaccensis]
Ma08_g18570	11.1357	21.0942	1.17723	0.0558083	-4.16338	0.000575197	0.0672874	chr08	32085290	32087705	-	1863	Ma08_g18570	GO:0003674;GO:0003824;GO:0004497;GO:0006725;GO:0007275;GO:0008150;GO:0008152;GO:0009058;GO:0009555;GO:0009653;GO:0009987;GO:0010208;GO:0010584;GO:0010927;GO:0016043;GO:0016491;GO:0016705;GO:0016713;GO:0018685;GO:0019438;GO:0022607;GO:0030198;GO:0032501;GO:0032502;GO:0032989;GO:0043062;GO:0044085;GO:0044237;GO:0044249;GO:0045229;GO:0048229;GO:0048646;GO:0048856;GO:0048869;GO:0055114;GO:0071840;GO:…	K20495	gi|695050912|ref|XP_009413465.1| PREDICTED: cytochrome P450 704B1 [Musa acuminata subsp. malaccensis]
Ma08_g27730	24.6181	48.9401	0.296055	0.00604933	-7.36901	0.0373663	0.611906	chr08	39877796	39880149	-	2056	Ma08_g27730	GO:0000003;GO:0003006;GO:0003674;GO:0003824;GO:0005575;GO:0005622;GO:0005623;GO:0005737;GO:0005739;GO:0006793;GO:0006796;GO:0007275;GO:0007276;GO:0008150;GO:0008152;GO:0008374;GO:0009058;GO:0009059;GO:0009555;GO:0009628;GO:0009987;GO:0010143;GO:0016020;GO:0016311;GO:0016740;GO:0016746;GO:0016747;GO:0016787;GO:0016788;GO:0016791;GO:0019953;GO:0022412;GO:0022414;GO:0030154;GO:0032501;GO:0032502;GO:…	K13508	gi|695054283|ref|XP_009415267.1| PREDICTED: glycerol-3-phosphate acyltransferase 1-like [Musa acuminata subsp. malaccensis]
Ma09_g04790	19.4041	35.8501	2.95822	0.0825164	-3.59917	0.0408117	0.637778	chr09	3093713	3097045	+	3185	Ma09_g04790	GO:0000003;GO:0001558;GO:0003674;GO:0003824;GO:0004672;GO:0005575;GO:0005618;GO:0005623;GO:0005886;GO:0005911;GO:0006464;GO:0006468;GO:0006793;GO:0006796;GO:0006807;GO:0006950;GO:0006952;GO:0007275;GO:0008150;GO:0008152;GO:0009506;GO:0009605;GO:0009607;GO:0009620;GO:0009719;GO:0009723;GO:0009725;GO:0009741;GO:0009787;GO:0009788;GO:0009791;GO:0009856;GO:0009966;GO:0009968;GO:0009987;GO:0010033;GO:…	-	gi|695056228|ref|XP_009416326.1| PREDICTED: receptor-like protein kinase FERONIA [Musa acuminata subsp. malaccensis] &gt;gi|695056230|ref|XP_009416327.1| PREDICTED: receptor-like protein kinase FERONIA [Musa acuminata subsp. malaccensis]
Ma09_g23550	1513.19	2055.2	971.18	0.472547	-1.08147	0.00649739	0.269583	chr09	35390453	35392459	-	1848	Ma09_g23550	GO:0000003;GO:0000902;GO:0000904;GO:0001558;GO:0003006;GO:0003674;GO:0003824;GO:0004672;GO:0004674;GO:0005575;GO:0005623;GO:0005886;GO:0006464;GO:0006468;GO:0006793;GO:0006796;GO:0006807;GO:0008150;GO:0008152;GO:0009653;GO:0009826;GO:0009846;GO:0009856;GO:0009860;GO:0009932;GO:0009987;GO:0010769;GO:0016020;GO:0016043;GO:0016049;GO:0016301;GO:0016310;GO:0016324;GO:0016740;GO:0016772;GO:0016773;GO:…	-	gi|695060932|ref|XP_009418877.1| PREDICTED: probable LRR receptor-like serine/threonine-protein kinase RLK [Musa acuminata subsp. malaccensis]
Ma09_g24370	65.9446	90.2953	41.5939	0.460644	-1.11828	0.00890439	0.308674	chr09	36040072	36049936	+	1695	Ma09_g24370	GO:0000003;GO:0005575;GO:0005622;GO:0005623;GO:0005737;GO:0005886;GO:0006950;GO:0006952;GO:0008150;GO:0009856;GO:0010483;GO:0012505;GO:0016020;GO:0022414;GO:0032501;GO:0044424;GO:0044464;GO:0044703;GO:0044706;GO:0050896;GO:0051703;GO:0051704;GO:0071944	K08472	gi|695060952|ref|XP_009418888.1| PREDICTED: MLO-like protein 9 [Musa acuminata subsp. malaccensis]
Ma10_g04000	55.3355	83.0253	27.6456	0.332978	-1.5865	0.000657327	0.0722145	chr10	14653986	14657693	+	2078	Ma10_g04000	GO:0000151;GO:0000302;GO:0001101;GO:0003674;GO:0005488;GO:0005515;GO:0005516;GO:0005575;GO:0005622;GO:0005623;GO:0005737;GO:0006355;GO:0006508;GO:0006511;GO:0006807;GO:0006950;GO:0006970;GO:0006979;GO:0007275;GO:0008150;GO:0008152;GO:0009056;GO:0009057;GO:0009266;GO:0009409;GO:0009553;GO:0009555;GO:0009628;GO:0009636;GO:0009651;GO:0009719;GO:0009723;GO:0009725;GO:0009751;GO:0009889;GO:0009987;GO:…	K17361	gi|695063279|ref|XP_009420137.1| PREDICTED: acyl-coenzyme A thioesterase 9, mitochondrial-like isoform X1 [Musa acuminata subsp. malaccensis]
Ma10_g07950	20.9873	30.965	11.0095	0.355548	-1.49188	0.034533	0.595211	chr10	22296789	22305257	+	3678	Ma10_g07950	GO:0000003;GO:0003006;GO:0003674;GO:0003824;GO:0005575;GO:0005623;GO:0005886;GO:0005887;GO:0006139;GO:0006725;GO:0006807;GO:0006950;GO:0007155;GO:0007275;GO:0007596;GO:0007599;GO:0008150;GO:0008152;GO:0009056;GO:0009555;GO:0009611;GO:0009653;GO:0009791;GO:0009900;GO:0009901;GO:0009908;GO:0009987;GO:0010208;GO:0010584;GO:0010927;GO:0016020;GO:0016021;GO:0016043;GO:0016462;GO:0016787;GO:0016817;GO:…	-	gi|695064606|ref|XP_009420860.1| PREDICTED: probable apyrase 7 [Musa acuminata subsp. malaccensis] &gt;gi|695064608|ref|XP_009420861.1| PREDICTED: probable apyrase 7 [Musa acuminata subsp. malaccensis] &gt;gi|695064610|ref|XP_009420862.1| PREDICTED: probable apyrase 7 [Musa acuminata subsp. malaccensis] &gt;gi|695064612|ref|XP_009420863.1| PREDICTED: probable apyrase 7 [Musa acuminata subsp. mala…
Ma11_g10400	26.8261	51.2908	2.36145	0.0460405	-4.44095	8.98226e-09	1.41852e-05	chr11	9785584	9787619	-	1638	Ma11_g10400	GO:0003674;GO:0005215;GO:0005351;GO:0005355;GO:0005402;GO:0005575;GO:0005623;GO:0005886;GO:0005887;GO:0006810;GO:0006811;GO:0006812;GO:0007275;GO:0008150;GO:0008324;GO:0008643;GO:0008645;GO:0009555;GO:0015075;GO:0015077;GO:0015078;GO:0015144;GO:0015145;GO:0015149;GO:0015291;GO:0015293;GO:0015294;GO:0015295;GO:0015318;GO:0015672;GO:0015749;GO:0016020;GO:0016021;GO:0022804;GO:0022857;GO:0022890;GO:…	-	gi|695071822|ref|XP_009383001.1| PREDICTED: sugar transport protein 8-like [Musa acuminata subsp. malaccensis]
Ma11_g10840	11.9768	19.8385	4.11518	0.207435	-2.26927	0.0439485	0.655815	chr11	10774988	10782303	+	2015	Ma11_g10840	GO:0000003;GO:0000902;GO:0000904;GO:0001505;GO:0003006;GO:0003674;GO:0003824;GO:0005575;GO:0005622;GO:0005623;GO:0005737;GO:0005829;GO:0006576;GO:0006629;GO:0006644;GO:0006650;GO:0006656;GO:0006793;GO:0006796;GO:0006807;GO:0006935;GO:0007275;GO:0008150;GO:0008152;GO:0008168;GO:0008170;GO:0008610;GO:0008654;GO:0008757;GO:0009058;GO:0009308;GO:0009309;GO:0009555;GO:0009605;GO:0009653;GO:0009791;GO:…	K05929	gi|695076212|ref|XP_009385384.1| PREDICTED: phosphoethanolamine N-methyltransferase 1-like [Musa acuminata subsp. malaccensis]
Ma11_g14300	104.26	141.181	67.3385	0.476967	-1.06804	0.003353	0.188275	chr11	19604528	19607464	-	2343	Ma11_g14300	GO:0000003;GO:0000902;GO:0000904;GO:0003006;GO:0003674;GO:0003824;GO:0005575;GO:0005622;GO:0005623;GO:0005737;GO:0005829;GO:0005886;GO:0006629;GO:0006644;GO:0006650;GO:0006793;GO:0006796;GO:0006810;GO:0006897;GO:0006898;GO:0007164;GO:0008150;GO:0008152;GO:0009653;GO:0009664;GO:0009826;GO:0009827;GO:0009846;GO:0009856;GO:0009860;GO:0009932;GO:0009987;GO:0010118;GO:0016020;GO:0016043;GO:0016049;GO:…	K00889	gi|695073487|ref|XP_009383914.1| PREDICTED: phosphatidylinositol 4-phosphate 5-kinase 6-like [Musa acuminata subsp. malaccensis]
Ma11_g19150	251.325	348.041	154.609	0.444228	-1.17063	0.00079991	0.0802596	chr11	24100209	24102800	+	2592	Ma11_g19150	GO:0005575;GO:0005623;GO:0005886;GO:0016020;GO:0016324;GO:0030427;GO:0035838;GO:0042995;GO:0044425;GO:0044459;GO:0044463;GO:0044464;GO:0045177;GO:0051286;GO:0071944;GO:0090404;GO:0090406;GO:0098590;GO:0120025;GO:0120038	-	gi|695075931|ref|XP_009385224.1| PREDICTED: receptor-like protein kinase ANXUR1 [Musa acuminata subsp. malaccensis]
Ma11_g21240	9.20945	15.6399	2.77903	0.177689	-2.49257	0.0144655	0.402952	chr11	25476113	25479641	-	1711	Ma11_g21240	GO:0000139;GO:0000271;GO:0003674;GO:0003824;GO:0005575;GO:0005622;GO:0005623;GO:0005737;GO:0005794;GO:0005975;GO:0005976;GO:0007275;GO:0008150;GO:0008152;GO:0009058;GO:0009059;GO:0009555;GO:0009653;GO:0009832;GO:0009834;GO:0009987;GO:0010208;GO:0010383;GO:0010410;GO:0010413;GO:0010417;GO:0010584;GO:0010927;GO:0012505;GO:0016020;GO:0016043;GO:0016051;GO:0016740;GO:0016757;GO:0016763;GO:0022607;GO:…	K20869	gi|695074900|ref|XP_009384670.1| PREDICTED: probable beta-1,4-xylosyltransferase IRX9H [Musa acuminata subsp. malaccensis]
