# Supplementary material for: Transcriptome analysis provides insight into the regulatory mechanisms underlying pollen germination recovery at normal high ambient temperature in wild banana (Musa itinerans)
Source: Front Plant Sci. 2023 Sep 26;14:1255418. doi: 10.3389/fpls.2023.1255418 (PMC10562711; doi:10.3389/fpls.2023.1255418)
Supplement: Supplementary Table 6 — The TFs likely to be subject to possible regulation of genes associated with the recovery of pollen germination. [file Table_6.xlsx]

## Sheet: Sheet1
Matrix ID	Name	Score	Relative score	Sequence ID	Start	End	Strand	Predicted sequence
MA2025.1	MA2025.1.MYB93	15.3872	0.962936	Ma03_g04440	1134	1147	-	TTTACCAAACAACA
MA1671.1	MA1671.1.ERF118	14.5616	0.965234	Ma03_g04440	1417	1427	-	CTCCGCCGCAG
MA2032.1	MA2032.1.TRB1	14.5288	0.958927	Ma03_g04440	1517	1527	-	AGAACCCTAAT
MA1770.1	MA1770.1.MYB40	14.2722	0.960017	Ma03_g04440	1135	1147	-	TTTACCAAACAAC
MA1807.1	MA1807.1.ZHD10	13.727	0.964732	Ma03_g04440	396	406	-	TTTAATTAGTC
MA2051.1	MA2051.1.NAC68	13.6764	0.97061	Ma03_g04440	508	519	-	ACACAAGTAAAA
MA2034.1	MA2034.1.NAC057	13.2631	0.974031	Ma03_g04440	508	518	-	CACAAGTAAAA
MA1674.2	MA1674.2.NAC017	12.9083	0.954972	Ma03_g04440	508	519	-	ACACAAGTAAAA
MA1775.1	MA1775.1.MYB61	12.8343	0.950355	Ma03_g04440	1136	1148	-	TTTTACCAAACAA
MA2037.1	MA2037.1.NAC096	12.6741	0.954536	Ma03_g04440	508	518	-	CACAAGTAAAA
MA1767.1	MA1767.1.MYB23	12.6577	0.964903	Ma03_g04440	1277	1287	+	TCAACAACATC
MA1767.1	MA1767.1.MYB23	12.474	0.961315	Ma03_g04440	376	386	+	TCAACTAAATA
MA1797.1	MA1797.1.RAV2	12.3698	0.968318	Ma03_g04440	336	343	-	ACAACATA
MA1800.1	MA1800.1.TEM1	12.1322	0.970165	Ma03_g04440	336	343	-	ACAACATA
MA1736.1	MA1736.1.AT5G04390	10.6777	0.951715	Ma03_g04440	425	435	+	TCTCTTCACTT
MA1736.1	MA1736.1.AT5G04390	10.656	0.951236	Ma03_g04440	458	468	+	TCACATCACTT
MA1804.1	MA1804.1.WIN1	10.6195	0.971306	Ma03_g04440	1416	1425	-	CCGCCGCAGA
MA1796.1	MA1796.1.RAP2-7	10.592	0.962438	Ma03_g04440	1876	1883	+	TCCGAGGT
MA1786.1	MA1786.1.NAC019	9.45762	0.967001	Ma03_g04440	1842	1
Matrix ID	Name	Score	Relative score	Sequence ID	Start	End	Strand	Predicted sequence
MA1769.1	MA1769.1.MYB39	16.3438	0.962488	Ma04_g30160	409	422	-	TCCCACCTAACTCT
MA1776.1	MA1776.1.MYB67	15.7277	0.952166	Ma04_g30160	401	421	-	CCCACCTAACTCTCTTCTCCA
MA1777.1	MA1777.1.MYB74	15.5814	0.964244	Ma04_g30160	409	422	-	TCCCACCTAACTCT
MA1762.1	MA1762.1.MYB10	15.1291	0.960511	Ma04_g30160	409	422	-	TCCCACCTAACTCT
MA1807.1	MA1807.1.ZHD10	15.0973	0.989499	Ma04_g30160	1006	1016	+	CATAATTAATT
MA1807.1	MA1807.1.ZHD10	15.0633	0.988884	Ma04_g30160	1009	1019	-	TATAATTAATT
MA1807.1	MA1807.1.ZHD10	14.4681	0.978127	Ma04_g30160	1460	1470	+	TTTAATTAATC
MA2008.1	MA2008.1.MYB99	14.2468	0.983173	Ma04_g30160	412	421	-	CCCACCTAAC
MA2012.1	MA2012.1.ERF023	14.2215	0.954476	Ma04_g30160	164	174	+	ACACCGACACA
MA2011.1	MA2011.1.ERF010	14.1115	0.958838	Ma04_g30160	163	174	+	GACACCGACACA
MA2027.1	MA2027.1.MYB44	14.061	0.953714	Ma04_g30160	1090	1101	-	TTAACGGTAACA
MA1807.1	MA1807.1.ZHD10	13.6228	0.96285	Ma04_g30160	1447	1457	-	TATAATTAGTA
MA1775.1	MA1775.1.MYB61	13.3868	0.959432	Ma04_g30160	1921	1933	-	CACTACCAACCTC
MA1780.1	MA1780.1.MYB92	13.3285	0.981372	Ma04_g30160	412	421	-	CCCACCTAAC
MA1807.1	MA1807.1.ZHD10	13.2985	0.956989	Ma04_g30160	1173	1183	-	AGTAATTAGTT
MA1775.1	MA1775.1.MYB61	13.2942	0.95791	Ma04_g30160	410	422	-	TCCCACCTAACTC
MA2049.1	MA2049.1.NAC053	12.9987	0.95711	Ma04_g30160	11	22	+	ACCAAGAAAGAA
MA1677.1	MA1677.1.NAC078	12.8401	0.951662	Ma04_g30160	11	22	+	ACCAAGAAAGAA
MA1428.1	MA1428.1.TCP8	11.5043	0.965723	Ma04_g30160	1598	1606	+	CGGCCCCAC
MA1804.1	MA1804.1.WIN1	9.82099	0.950867	Ma04_g30160	99	108	-	GCGCCGCCTT
MA1804.1	MA1804.1.WIN1	9.80596	0.950483	Ma04_g30160	269	278	+	GCACCGCCAT
MA1786.1	MA1786.1.NAC019	9.13333	0.957747	Ma04_g30160	1886	1895
MA1795.1	MA1795.1.RAP2-4	12.3613	0.993726	Ma04_g08050	239	248	-	CACCGACCAC
MA1807.1	MA1807.1.ZHD10	14.9372	0.986606	Ma04_g08050	430	440	+	CTTAATTAGTT
MA2005.1	MA2005.1.NAC016	13.059	0.986388	Ma04_g08050	1328	1338	-	CACAAGCAAGA
MA1807.1	MA1807.1.ZHD10	14.8182	0.984455	Ma04_g08050	718	728	+	GTTAATTAATT
MA1677.1	MA1677.1.NAC078	14.5256	0.983401	Ma04_g08050	69	80	-	CACAAGAAACGT
MA2043.1	MA2043.1.NAC004	13.9021	0.983069	Ma04_g08050	70	80	-	CACAAGAAACG
MA2049.1	MA2049.1.NAC053	14.369	0.982385	Ma04_g08050	69	80	-	CACAAGAAACGT
MA1677.1	MA1677.1.NAC078	14.4593	0.982151	Ma04_g08050	1126	1137	-	CCCAAGAAACAA
MA1737.1	MA1737.1.AT5G05090	12.2668	0.981731	Ma04_g08050	1836	1846	+	ATAGATCCGCA
MA2049.1	MA2049.1.NAC053	14.084	0.977128	Ma04_g08050	1126	1137	-	CCCAAGAAACAA
MA2010.1	MA2010.1.SMB	12.6402	0.974282	Ma04_g08050	1328	1338	-	CACAAGCAAGA
MA1796.1	MA1796.1.RAP2-7	11.151	0.973256	Ma04_g08050	109	116	-	TGCGAGGT
MA2044.1	MA2044.1.NAC007	12.6495	0.97319	Ma04_g08050	1328	1338	-	CACAAGCAAGA
MA1807.1	MA1807.1.ZHD10	14.1484	0.972349	Ma04_g08050	710	720	+	AATAATTAGTT
MA1767.1	MA1767.1.MYB23	12.8245	0.968158	Ma04_g08050	1885	1895	+	CCAACTAATTT
MA2047.1	MA2047.1.NAC037	12.8206	0.967348	Ma04_g08050	1328	1338	-	CACAAGCAAGA
MA2049.1	MA2049.1.NAC053	13.4806	0.965998	Ma04_g08050	639	650	-	CTCAAGAAAAAT
MA1737.1	MA1737.1.AT5G05090	11.4735	0.964778	Ma04_g08050	1157	1167	-	ATAGATTCTGA
MA1804.1	MA1804.1.WIN1	10.362	0.964715	Ma04_g08050	935	944	+	ACGCCGCCGC
MA1807.1	MA1807.1.ZHD10	13.7197	0.964601	Ma04_g08050	717	727	-	ATTAATTAACT
MA2034.1	MA2034.1.NAC057	12.757	0.962862	Ma04_g08050	1267	1277	-	ATCAAGTAAAT
MA1677.1	MA1677.1.NAC078	13.4289	0.962749	Ma04_g08050	639	650	-	CTCAAGAAAAAT
MA1706.1	MA1706.1.AT1G14600	10.7352	0.962515	Ma04_g08050	1700	1709	-	CAACATTCTG
MA1804.1	MA1804.1.WIN1	10.2626	0.962172	Ma04_g08050	919	928	-	CCGCCGCCAC
MA1671.1	MA1671.1.ERF118	14.2297	0.959487	Ma04_g08050	936	946	+	CGCCGCCGCCC
MA1807.1	MA1807.1.ZHD10	13.3873	0.958594	Ma04_g08050	721	731	-	GGTAATTAATT
MA2037.1	MA2037.1.NAC096	12.846	0.958361	Ma04_g08050	1267	1277	-	ATCAAGTAAAT
MA2016.1	MA2016.1.GRF6	12.7612	0.958247	Ma04_g08050	1194	1203	-	CTCTGACAAC
MA2043.1	MA2043.1.NAC004	12.6491	0.957692	Ma04_g08050	1127	1137	-	CCCAAGAAACA
MA1674.2	MA1674.2.NAC017	12.9767	0.956462	Ma04_g08050	1267	1278	-	AATCAAGTAAAT
MA2036.1	MA2036.1.NAC076	12.263	0.955785	Ma04_g08050	1327	1338	-	CACAAGCAAGAG
MA1706.1	MA1706.1.AT1G14600	10.27	0.95268	Ma04_g08050	742	751	+	CAACATTCCA
MA2052.1	MA2052.1.ZAT6	13.9641	0.951503	Ma04_g08050	452	463	-	AAAATGATTTAT
MA1751.1	MA1751.1.EIL3	12.6711	0.950919	Ma04_g08050	1072	1082	+	CAGGTTCATCA
MA1804.1	MA1804.1.WIN1	9.79285	0.950147	Ma04_g08050	892	901	-	GCACCGCCGC
MA1046.1	MA1046.1.NTL9	17.4595	1	Ma05_g01550	1743	1751	-	TTAAGTAAT
MA0984.1	MA0984.1.DOF5.7	9.6765	1	Ma05_g01550	197	204	-	AAAAGAGG
MA1049.1	MA1049.1.ERF094	13.2937	1	Ma05_g01550	42	49	-	CGCCGCCG
MA0986.1	MA0986.1.DREB2C	14.2612	1	Ma05_g01550	366	373	-	CACCGACA
MA1000.1	MA1000.1.ERF105	14.1894	1	Ma05_g01550	9	16	+	TGCCGGCG
MA1051.1	MA1051.1.RAP2-3	13.0163	1	Ma05_g01550	14	21	+	GCGCCGCC
MA0976.1	MA0976.1.CRF4	13.6672	1	Ma05_g01550	14	21	+	GCGCCGCC
MA0980.1	MA0980.1.RAP2-10	14.3494	1	Ma05_g01550	14	21	+	GCGCCGCC
MA0567.1	MA0567.1.ERF1B	13.2489	1	Ma05_g01550	15	22	+	CGCCGCCA
MA1004.1	MA1004.1.ERF13	12.7599	1	Ma05_g01550	15	22	+	CGCCGCCA
MA1026.1	MA1026.1.ATHB-15	12.4353	1	Ma05_g01550	706	713	+	TAATTATT
MA1053.1	MA1053.1.ERF109	14.1223	1	Ma05_g01550	14	21	+	GCGCCGCC
MA0979.1	MA0979.1.ERF008	11.8222	1	Ma05_g01550	64	71	-	CGCCGCCC
MA0979.1	MA0979.1.ERF008	11.8222	1	Ma05_g01550	170	177	+	CGCCGCCC
MA1005.1	MA1005.1.ERF3	13.5575	1	Ma05_g01550	15	22	+	CGCCGCCA
MA0997.1	MA0997.1.ERF069	9.83564	1	Ma05_g01550	14	22	+	GCGCCGCCA
MA0932.1	MA0932.1.AHL12	11.2807	0.999099	Ma05_g01550	707	714	+	AATTATTT
MA0932.1	MA0932.1.AHL12	11.2807	0.999099	Ma05_g01550	707	714	-	AAATAATT
MA1071.1	MA1071.1.DOF5.3	7.30606	0.996356	Ma05_g01550	403	409	-	CAAAAAG
MA1071.1	MA1071.1.DOF5.3	7.30606	0.996356	Ma05_g01550	1276	1282	-	AAAAAAG
MA1071.1	MA1071.1.DOF5.3	7.28898	0.995602	Ma05_g01550	888	894	+	TAAAAAG
MA1027.1	MA1027.1.KAN1	10.0461	0.995439	Ma05_g01550	698	705	+	AAATATTC
MA0995.1	MA0995.1.ERF039	11.7893	0.992534	Ma05_g01550	365	374	+	GTGTCGGTGA
MA0998.1	MA0998.1.ERF096	11.9993	0.991262	Ma05_g01550	14	23	+	GCGCCGCCAC
MA0975.1	MA0975.1.CRF2	13.3042	0.990242	Ma05_g01550	14	21	+	GCGCCGCC
MA0979.1	MA0979.1.ERF008	11.4874	0.990182	Ma05_g01550	42	49	-	CGCCGCCG
MA0942.1	MA0942.1.ARF1	12.9102	0.989576	Ma05_g01550	365	372	-	ACCGACAC
MA1071.1	MA1071.1.DOF5.3	7.05293	0.985175	Ma05_g01550	439	445	-	AATAAAG
MA1004.1	MA1004.1.ERF13	12.0662	0.984059	Ma05_g01550	42	49	-	CGCCGCCG
MA1049.1	MA1049.1.ERF094	12.3167	0.980339	Ma05_g01550	15	22	+	CGCCGCCA
MA1071.1	MA1071.1.DOF5.3	6.91327	0.979006	Ma05_g01550	200	206	-	GTAAAAG
MA1006.1	MA1006.1.ERF6	13.4826	0.978629	Ma05_g01550	8	17	+	TTGCCGGCGC
MA0981.1	MA0981.1.DOF1.8	7.88987	0.978627	Ma05_g01550	1281	1290	-	TGAAAAGTAA
MA1017.1	MA1017.1.GATA8	9.39772	0.978113	Ma05_g01550	1599	1607	-	AAGATCTGA
MA0968.1	MA0968.1.BZIP68	9.79269	0.977996	Ma05_g01550	579	587	+	TCACGTGTC
MA1016.1	MA1016.1.GATA15	8.41949	0.977824	Ma05_g01550	1855	1863	+	TTTGATCAA
MA1005.1	MA1005.1.ERF3	12.52	0.977095	Ma05_g01550	42	49	-	CGCCGCCG
MA1047.1	MA1047.1.TGA5	11.6582	0.976465	Ma05_g01550	383	390	+	CTGACGTC
MA1001.1	MA1001.1.ERF11	9.91082	0.976059	Ma05_g01550	14	23	+	GCGCCGCCAC
MA1071.1	MA1071.1.DOF5.3	6.83078	0.975362	Ma05_g01550	1127	1133	-	ATAAAAG
MA1016.1	MA1016.1.GATA15	8.34647	0.975148	Ma05_g01550	1856	1864	-	CTTGATCAA
MA0982.1	MA0982.1.DOF2.4	7.57764	0.974833	Ma05_g01550	889	895	+	AAAAAGC
MA0931.1	MA0931.1.ABI5	13.2673	0.974443	Ma05_g01550	579	588	-	GGACACGTGA
MA0964.1	MA0964.1.BIM1	10.0658	0.97412	Ma05_g01550	577	586	-	ACACGTGAGC
MA0995.2	MA0995.2.ERF039	13.3236	0.974081	Ma05_g01550	364	374	-	TCACCGACACG
MA1000.1	MA1000.1.ERF105	12.8988	0.973891	Ma05_g01550	39	46	+	GGCCGGCG
MA1071.1	MA1071.1.DOF5.3	6.78824	0.973483	Ma05_g01550	1326	1332	-	GCAAAAG
MA1071.1	MA1071.1.DOF5.3	6.78344	0.973271	Ma05_g01550	1057	1063	-	TGAAAAG
MA1071.1	MA1071.1.DOF5.3	6.78344	0.973271	Ma05_g01550	1284	1290	-	TGAAAAG
MA1071.1	MA1071.1.DOF5.3	6.78344	0.973271	Ma05_g01550	1436	1442	-	TGAAAAG
MA0984.1	MA0984.1.DOF5.7	8.77668	0.973178	Ma05_g01550	1054	1061	-	AAAAGAGC
MA1164.1	MA1164.1.HHO5	14.6026	0.972656	Ma05_g01550	919	929	-	TTAAAGATTCC
MA0982.1	MA0982.1.DOF2.4	7.48714	0.97104	Ma05_g01550	1283	1289	-	GAAAAGT
MA0982.1	MA0982.1.DOF2.4	7.48714	0.97104	Ma05_g01550	1435	1441	-	GAAAAGT
MA0992.1	MA0992.1.ERF4	11.9757	0.970188	Ma05_g01550	14	21	+	GCGCCGCC
MA0981.1	MA0981.1.DOF1.8	7.68356	0.970126	Ma05_g01550	1323	1332	-	GCAAAAGTAA
MA0983.1	MA0983.1.DOF5.6	7.96495	0.969521	Ma05_g01550	888	895	+	TAAAAAGC
MA0983.1	MA0983.1.DOF5.6	7.93729	0.968505	Ma05_g01550	1283	1290	-	TGAAAAGT
MA0983.1	MA0983.1.DOF5.6	7.93729	0.968505	Ma05_g01550	1435	1442	-	TGAAAAGT
MA0567.1	MA0567.1.ERF1B	12.058	0.967851	Ma05_g01550	42	49	-	CGCCGCCG
MA1071.1	MA1071.1.DOF5.3	6.66014	0.967824	Ma05_g01550	924	930	-	GTTAAAG
MA0981.1	MA0981.1.DOF1.8	7.59918	0.966648	Ma05_g01550	1433	1442	-	TGAAAAGTAT
MA0965.1	MA0965.1.BIM2	11.0712	0.966285	Ma05_g01550	578	587	+	CTCACGTGTC
MA0965.1	MA0965.1.BIM2	11.0712	0.966285	Ma05_g01550	578	587	-	GACACGTGAG
MA1017.1	MA1017.1.GATA8	9.02237	0.966174	Ma05_g01550	377	385	-	CAGATCCAT
MA0933.1	MA0933.1.AHL20	11.4011	0.96586	Ma05_g01550	1317	1324	-	AATAAAAT
MA0997.1	MA0997.1.ERF069	8.8786	0.964628	Ma05_g01550	9	17	-	GCGCCGGCA
MA0561.1	MA0561.1.PIF4	12.0682	0.964455	Ma05_g01550	580	587	+	CACGTGTC
MA1027.1	MA1027.1.KAN1	9.09563	0.963117	Ma05_g01550	414	421	+	TGATATTC
MA1027.1	MA1027.1.KAN1	9.09563	0.963117	Ma05_g01550	1629	1636	+	TGATATTC
MA1049.1	MA1049.1.ERF094	11.4504	0.962905	Ma05_g01550	1956	1963	-	AGCCGCCT
MA1071.1	MA1071.1.DOF5.3	6.54739	0.962844	Ma05_g01550	1771	1777	-	AGTAAAG
MA0008.1	MA0008.1.HAT5	11.6187	0.962517	Ma05_g01550	706	713	+	TAATTATT
MA0964.1	MA0964.1.BIM1	9.68631	0.96246	Ma05_g01550	579	588	+	TCACGTGTCC
MA1014.1	MA1014.1.GATA11	12.5372	0.962361	Ma05_g01550	1600	1607	-	AAGATCTG
MA1051.1	MA1051.1.RAP2-3	11.4348	0.962224	Ma05_g01550	13	20	-	GCGGCGCC
MA1005.1	MA1005.1.ERF3	11.8104	0.961428	Ma05_g01550	9	16	-	CGCCGGCA
MA1168.1	MA1168.1.MYR2	14.9536	0.961134	Ma05_g01550	696	709	-	ATTAGAATATTTTA
MA0983.1	MA0983.1.DOF5.6	7.73057	0.960908	Ma05_g01550	1325	1332	-	GCAAAAGT
MA0993.1	MA0993.1.ERF7	9.94118	0.960838	Ma05_g01550	15	24	+	CGCCGCCACG
MA0956.1	MA0956.1.BEE2	9.48455	0.960759	Ma05_g01550	578	587	+	CTCACGTGTC
MA0956.1	MA0956.1.BEE2	9.48455	0.960759	Ma05_g01550	578	587	-	GACACGTGAG
MA0975.1	MA0975.1.CRF2	11.9468	0.960756	Ma05_g01550	169	176	+	TCGCCGCC
MA1016.1	MA1016.1.GATA15	7.93598	0.960109	Ma05_g01550	1121	1129	+	CATGATCTT
MA0992.1	MA0992.1.ERF4	11.5789	0.960098	Ma05_g01550	43	50	-	ACGCCGCC
MA0992.1	MA0992.1.ERF4	11.5789	0.960098	Ma05_g01550	65	72	-	ACGCCGCC
MA0981.1	MA0981.1.DOF1.8	7.41611	0.959104	Ma05_g01550	888	897	+	TAAAAAGCTT
MA0934.1	MA0934.1.AHL25	10.6316	0.958819	Ma05_g01550	707	714	+	AATTATTT
MA0934.1	MA0934.1.AHL25	10.6316	0.958819	Ma05_g01550	707	714	-	AAATAATT
MA1071.1	MA1071.1.DOF5.3	6.45261	0.958657	Ma05_g01550	1657	1663	-	ACTAAAG
MA1015.1	MA1015.1.GATA12	9.16288	0.958382	Ma05_g01550	1600	1607	+	CAGATCTT
MA1015.1	MA1015.1.GATA12	9.16288	0.958382	Ma05_g01550	1600	1607	-	AAGATCTG
MA1049.1	MA1049.1.ERF094	11.1634	0.957128	Ma05_g01550	64	71	-	CGCCGCCC
MA1049.1	MA1049.1.ERF094	11.1634	0.957128	Ma05_g01550	170	177	+	CGCCGCCC
MA0994.1	MA0994.1.ERF8	10.5562	0.956966	Ma05_g01550	15	24	+	CGCCGCCACG
MA0581.1	MA0581.1.LEC2	12.6168	0.956939	Ma05_g01550	1116	1126	-	ATCATGCACAT
MA0982.1	MA0982.1.DOF2.4	7.14305	0.956617	Ma05_g01550	402	408	-	AAAAAGA
MA0982.1	MA0982.1.DOF2.4	7.14305	0.956617	Ma05_g01550	1275	1281	-	AAAAAGA
MA1005.2	MA1005.2.ERF3	14.2486	0.956071	Ma05_g01550	13	23	+	GGCGCCGCCAC
MA0121.1	MA0121.1.ARR10	8.80336	0.955847	Ma05_g01550	1599	1606	-	AGATCTGA
MA0953.1	MA0953.1.ATHB-6	9.44896	0.954334	Ma05_g01550	1649	1657	-	GCAATTATA
MA1074.1	MA1074.1.UNE10	11.6737	0.954332	Ma05_g01550	579	586	-	ACACGTGA
MA0930.2	MA0930.2.ABF3	11.8748	0.954154	Ma05_g01550	580	589	+	CACGTGTCCC
MA1053.1	MA1053.1.ERF109	11.8755	0.953856	Ma05_g01550	13	20	-	GCGGCGCC
MA0982.1	MA0982.1.DOF2.4	7.05788	0.953047	Ma05_g01550	1325	1331	-	CAAAAGT
MA0997.1	MA0997.1.ERF069	8.56387	0.952996	Ma05_g01550	42	50	-	ACGCCGCCG
MA0932.1	MA0932.1.AHL12	9.33169	0.952416	Ma05_g01550	697	704	+	AAAATATT
MA0932.1	MA0932.1.AHL12	9.33169	0.952416	Ma05_g01550	697	704	-	AATATTTT
MA1004.1	MA1004.1.ERF13	10.6799	0.952205	Ma05_g01550	64	71	-	CGCCGCCC
MA1004.1	MA1004.1.ERF13	10.6799	0.952205	Ma05_g01550	170	177	+	CGCCGCCC
MA0945.1	MA0945.1.ARR1	9.68355	0.952005	Ma05_g01550	917	926	+	AGGGAATCTT
MA1004.1	MA1004.1.ERF13	10.6656	0.951877	Ma05_g01550	9	16	-	CGCCGGCA
MA0938.1	MA0938.1.NAC058	9.88855	0.951839	Ma05_g01550	726	733	-	GCAAGCAA
MA0562.1	MA0562.1.PIF5	11.428	0.951678	Ma05_g01550	579	586	+	TCACGTGT
MA0983.1	MA0983.1.DOF5.6	7.45948	0.950947	Ma05_g01550	402	409	-	CAAAAAGA
MA0983.1	MA0983.1.DOF5.6	7.44305	0.950343	Ma05_g01550	1275	1282	-	AAAAAAGA
MA1676.2	MA1676.2.NAC062	15.342	0.969013	Ma05_g18400	754	767	+	ATATTAAGTAATTA
MA1673.1	MA1673.1.LBD18	14.4352	0.962841	Ma05_g18400	1508	1519	-	AAGCCGGAAAAA
MA2008.1	MA2008.1.MYB99	14.3121	0.984399	Ma05_g18400	1085	1094	-	TTCACCTACT
MA2008.1	MA2008.1.MYB99	14.2468	0.983173	Ma05_g18400	1345	1354	-	CCCACCTAAC
MA1780.1	MA1780.1.MYB92	13.3285	0.981372	Ma05_g18400	1345	1354	-	CCCACCTAAC
MA2051.1	MA2051.1.NAC68	13.1424	0.958471	Ma05_g18400	949	960	+	TGACAAGTAAAA
MA1740.1	MA1740.1.BHLH49	12.9267	0.9646	Ma05_g18400	1498	1507	+	CCCACGTGCC
MA2034.1	MA2034.1.NAC057	12.7716	0.963184	Ma05_g18400	950	960	+	GACAAGTAAAA
MA1805.1	MA1805.1.WRKY53	12.6371	0.993792	Ma05_g18400	1001	1009	-	AGTCAACGG
MA1706.1	MA1706.1.AT1G14600	11.5533	0.979813	Ma05_g18400	695	704	-	ATATATTCTA
MA1805.1	MA1805.1.WRKY53	11.008	0.953771	Ma05_g18400	368	376	+	GGTCAACCT
MA1706.1	MA1706.1.AT1G14600	10.9528	0.967117	Ma05_g18400	1166	1175	+	CTATATTCTA
MA1737.1	MA1737.1.AT5G05090	10.8486	0.951424	Ma05_g18400	1296	1306	+	CAAGATACGAT
MA1706.1	MA1706.1.AT1G14600	10.5213	0.957994	Ma05_g18400	528	537	+	ATATATTCCT
MA1796.1	MA1796.1.RAP2-7	10.1739	0.954345	Ma05_g18400	191	19
MA1327.2	MA1327.2.ATHB-23	15.7788	1	Ma06_g22410	610	619	-	TTAATTAATT
MA1327.2	MA1327.2.ATHB-23	15.7788	1	Ma06_g22410	612	621	+	TTAATTAATT
MA1327.2	MA1327.2.ATHB-23	15.7788	1	Ma06_g22410	614	623	-	TTAATTAATT
MA1327.2	MA1327.2.ATHB-23	15.7788	1	Ma06_g22410	616	625	+	TTAATTAATT
MA1304.1	MA1304.1.WRKY59	16.2651	0.995629	Ma06_g22410	926	937	-	CAAAAGTCAAAG
MA1328.1	MA1328.1.ZHD9	18.2717	0.989332	Ma06_g22410	609	623	-	TTAATTAATTAATTA
MA1329.2	MA1329.2.ZHD1	17.9261	0.988657	Ma06_g22410	609	621	+	TAATTAATTAATT
MA1329.2	MA1329.2.ZHD1	17.9261	0.988657	Ma06_g22410	610	622	-	TAATTAATTAATT
MA1329.2	MA1329.2.ZHD1	17.9261	0.988657	Ma06_g22410	613	625	+	TAATTAATTAATT
MA1388.1	MA1388.1.PHL2	11.1384	0.98653	Ma06_g22410	706	713	-	AGAATATG
MA1327.2	MA1327.2.ATHB-23	15.0357	0.986524	Ma06_g22410	557	566	+	ATAATTAATT
MA1329.2	MA1329.2.ZHD1	17.6995	0.984625	Ma06_g22410	614	626	-	AAATTAATTAATT
MA1397.1	MA1397.1.AT1G74840	15.1085	0.984402	Ma06_g22410	1157	1167	+	TATGGATAATG
MA1185.1	MA1185.1.LHY	15.9988	0.98252	Ma06_g22410	1106	1115	+	AGATATTTAT
MA1301.1	MA1301.1.WRKY33	16.448	0.980765	Ma06_g22410	926	936	-	AAAAGTCAAAG
MA1309.1	MA1309.1.WRKY3	16.6472	0.980269	Ma06_g22410	926	936	-	AAAAGTCAAAG
MA1401.1	MA1401.1.RVE7	18.0452	0.976783	Ma06_g22410	1104	1115	-	ATAAATATCTTA
MA1184.1	MA1184.1.RVE1	17.6712	0.976515	Ma06_g22410	1104	1117	-	ATATAAATATCTTA
MA1316.1	MA1316.1.WRKY71	17.1907	0.976425	Ma06_g22410	926	936	-	AAAAGTCAAAG
MA1329.2	MA1329.2.ZHD1	17.2275	0.976228	Ma06_g22410	122	134	-	AAACTAATTAAGT
MA1191.1	MA1191.1.RVE7L	18.0019	0.975689	Ma06_g22410	1104	1118	-	TATATAAATATCTTA
MA1295.1	MA1295.1.WRKY20	15.1935	0.975219	Ma06_g22410	924	936	+	AGCTTTGACTTTT
MA1360.2	MA1360.2.BHLH74	12.7093	0.974588	Ma06_g22410	1434	1447	-	GAGGCACGTGGCGG
MA1327.2	MA1327.2.ATHB-23	14.2622	0.972499	Ma06_g22410	608	617	+	CTAATTAATT
MA1328.1	MA1328.1.ZHD9	17.1266	0.971297	Ma06_g22410	502	516	+	TTAATCTATTAATTA
MA1231.2	MA1231.2.ERF15	15.8125	0.971127	Ma06_g22410	1428	1441	+	CCTTCGCCGCCACG
MA1298.1	MA1298.1.WRKY29	16.1392	0.970535	Ma06_g22410	926	936	-	AAAAGTCAAAG
MA1326.1	MA1326.1.ZHD5	13.2188	0.969658	Ma06_g22410	555	565	+	ATATAATTAAT
MA1272.2	MA1272.2.DOF2.2	12.7154	0.969629	Ma06_g22410	1516	1525	+	ATAAAAAGAT
MA1311.1	MA1311.1.WRKY28	16.4831	0.968657	Ma06_g22410	924	936	+	AGCTTTGACTTTT
MA1326.1	MA1326.1.ZHD5	13.1425	0.968163	Ma06_g22410	1166	1176	+	TGGTAATTAAT
MA1327.2	MA1327.2.ATHB-23	13.993	0.967616	Ma06_g22410	559	568	-	TAAATTAATT
MA1296.1	MA1296.1.WRKY46	15.2626	0.96752	Ma06_g22410	926	936	+	CTTTGACTTTT
MA1182.1	MA1182.1.RVE8	16.4356	0.96381	Ma06_g22410	1106	1117	+	AGATATTTATAT
MA1388.1	MA1388.1.PHL2	10.0838	0.962949	Ma06_g22410	57	64	+	CGAATATT
MA1276.1	MA1276.1.DOF3.5	12.8409	0.962302	Ma06_g22410	1636	1646	-	GAAAAAGGGAC
MA1198.1	MA1198.1.HAT2	13.6232	0.960787	Ma06_g22410	223	233	+	TTTAATCATAA
MA1327.2	MA1327.2.ATHB-23	13.606	0.960598	Ma06_g22410	508	517	-	CTAATTAATA
MA1190.1	MA1190.1.RVE5	16.001	0.960206	Ma06_g22410	1106	1116	+	AGATATTTATA
MA1328.1	MA1328.1.ZHD9	16.4041	0.959918	Ma06_g22410	617	631	-	ATTAGAAATTAATTA
MA1211.1	MA1211.1.ATHB-X	13.2193	0.959603	Ma06_g22410	1087	1097	-	GTAATTATTAT
MA1187.1	MA1187.1.RVE4	15.6004	0.958915	Ma06_g22410	1106	1115	+	AGATATTTAT
MA1329.1	MA1329.1.ZHD1	15.7074	0.95876	Ma06_g22410	609	623	+	TAATTAATTAATTAA
MA1275.1	MA1275.1.DOF1.6	12.1877	0.958059	Ma06_g22410	578	588	-	CGTAAAAGTAA
MA1183.1	MA1183.1.RVE6	15.7909	0.955876	Ma06_g22410	1106	1116	+	AGATATTTATA
MA1372.1	MA1372.1.ZAT10	11.0934	0.955328	Ma06_g22410	646	656	+	TACTTCCACTC
MA1328.1	MA1328.1.ZHD9	16.0235	0.953923	Ma06_g22410	558	572	-	TAAATAAATTAATTA
MA1297.1	MA1297.1.WRKY26	16.5947	0.953716	Ma06_g22410	924	936	-	AAAAGTCAAAGCT
MA1231.1	MA1231.1.ERF15	17.0249	0.952489	Ma06_g22410	1426	1440	+	TGCCTTCGCCGCCAC
MA1272.2	MA1272.2.DOF2.2	11.8788	0.952196	Ma06_g22410	959	968	-	TAAAAAAGCA
MA1317.1	MA1317.1.WRKY50	16.6967	0.952097	Ma06_g22410	926	938	+	CTTTGACTTTTGG
MA1329.1	MA1329.1.ZHD1	15.2828	0.951663	Ma06_g22410	613	627	+	TAATTAATTAATTTC
MA1245.2	MA1245.2.ERF112	13.9904	0.950749	Ma06_g22410	1430	1440	+	TTCGCCGCCAC
MA2018.1	MA2018.1.NAC69	15.256	0.996165	Ma06_g28660	1221	1232	-	GAACAAGGCAAC
MA1770.1	MA1770.1.MYB40	15.0987	0.97226	Ma06_g28660	382	394	-	TTTACCTAATATA
MA1737.1	MA1737.1.AT5G05090	11.787	0.971479	Ma06_g28660	1974	1984	-	CAAGATTCGGA
MA1780.1	MA1780.1.MYB92	12.6336	0.967403	Ma06_g28660	385	394	-	TTTACCTAAT
MA1801.1	MA1801.1.TREE1	10.5722	0.963755	Ma06_g28660	891	901	+	AGTTAGCTTTT
MA1801.1	MA1801.1.TREE1	10.5722	0.963755	Ma06_g28660	953	963	+	AGTTAGCTTTT
MA1767.1	MA1767.1.MYB23	12.5877	0.963536	Ma06_g28660	622	632	+	TCAACAAATAT
MA1772.1	MA1772.1.MYB43	15.0079	0.960296	Ma06_g28660	383	395	-	CTTTACCTAATAT
MA1786.1	MA1786.1.NAC019	9.19041	0.959376	Ma06_g28660	1089	1098	+	TTTACGGAAC
MA1793.1	MA1793.1.NID1	10.4715	0.959178	Ma06_g28660	1284	1293	-	ATTATCCACA
MA2008.1	MA2008.1.MYB99	12.9328	0.958478	Ma06_g28660	652	661	-	TTCACCTACA
MA1757.1	MA1757.1.HDG7	13.5257	0.954233	Ma06_g28660	493	50
Matrix ID	Name	Score	Relative score	Sequence ID	Start	End	Strand	Predicted sequence
MA0982.1	MA0982.1.DOF2.4	8.1781	1	Ma08_g02860	20	26	+	AAAAAGT
MA0982.1	MA0982.1.DOF2.4	8.1781	1	Ma08_g02860	1077	1083	+	AAAAAGT
MA1071.1	MA1071.1.DOF5.3	7.38855	1	Ma08_g02860	19	25	+	GAAAAAG
MA1071.1	MA1071.1.DOF5.3	7.38855	1	Ma08_g02860	463	469	+	GAAAAAG
MA1015.1	MA1015.1.GATA12	10.5687	1	Ma08_g02860	480	487	+	TAGATCTA
MA1015.1	MA1015.1.GATA12	10.5687	1	Ma08_g02860	480	487	-	TAGATCTA
MA0933.1	MA0933.1.AHL20	12.9333	1	Ma08_g02860	884	891	-	AATTAAAT
MA0979.1	MA0979.1.ERF008	11.8222	1	Ma08_g02860	1405	1412	+	CGCCGCCC
MA1027.1	MA1027.1.KAN1	10.1802	1	Ma08_g02860	58	65	-	AGATATTC
MA1027.1	MA1027.1.KAN1	10.1802	1	Ma08_g02860	408	415	+	AGATATTC
MA0983.1	MA0983.1.DOF5.6	8.79438	1	Ma08_g02860	19	26	+	GAAAAAGT
MA0983.1	MA0983.1.DOF5.6	8.76741	0.999009	Ma08_g02860	1076	1083	+	CAAAAAGT
MA0932.1	MA0932.1.AHL12	11.2431	0.998197	Ma08_g02860	114	121	+	AAATATTT
MA0932.1	MA0932.1.AHL12	11.2431	0.998197	Ma08_g02860	114	121	-	AAATATTT
MA0932.1	MA0932.1.AHL12	11.2431	0.998197	Ma08_g02860	673	680	+	AAATATTT
MA0932.1	MA0932.1.AHL12	11.2431	0.998197	Ma08_g02860	673	680	-	AAATATTT
MA1071.1	MA1071.1.DOF5.3	7.30606	0.996356	Ma08_g02860	233	239	+	AAAAAAG
MA1071.1	MA1071.1.DOF5.3	7.30606	0.996356	Ma08_g02860	1076	1082	+	CAAAAAG
MA1071.1	MA1071.1.DOF5.3	7.30606	0.996356	Ma08_g02860	1229	1235	+	AAAAAAG
MA0970.1	MA0970.1.CAMTA3	10.3909	0.99404	Ma08_g02860	1508	1516	-	CCGCGTTCC
MA1085.1	MA1085.1.WRKY40	9.16993	0.993171	Ma08_g02860	1218	1225	-	CGGTCAAA
MA1024.1	MA1024.1.HAT1	14.1943	0.989841	Ma08_g02860	290	299	-	CTAATCATTA
MA1085.1	MA1085.1.WRKY40	9.05529	0.989375	Ma08_g02860	998	1005	+	AGGTCAAA
MA0982.1	MA0982.1.DOF2.4	7.92428	0.989362	Ma08_g02860	1010	1016	+	ATAAAGT
MA1026.1	MA1026.1.ATHB-15	12.0115	0.988424	Ma08_g02860	290	297	+	TAATGATT
MA1018.1	MA1018.1.GATA9	14.1775	0.987239	Ma08_g02860	479	489	-	TCTAGATCTAT
MA0969.1	MA0969.1.CAMTA2	10.6501	0.986544	Ma08_g02860	1511	1519	-	GAACCGCGT
MA1042.1	MA1042.1.MYB59	12.6699	0.986104	Ma08_g02860	1740	1747	-	ATTAGGTA
MA0951.1	MA0951.1.ATHB-16	13.4117	0.985891	Ma08_g02860	291	298	-	TAATCATT
MA0983.1	MA0983.1.DOF5.6	8.4037	0.985644	Ma08_g02860	1009	1016	+	TATAAAGT
MA1071.1	MA1071.1.DOF5.3	7.05293	0.985175	Ma08_g02860	795	801	+	AATAAAG
MA1071.1	MA1071.1.DOF5.3	7.05293	0.985175	Ma08_g02860	993	999	+	CATAAAG
MA0981.1	MA0981.1.DOF1.8	8.04136	0.98487	Ma08_g02860	959	968	+	GGAAAAGTTA
MA0934.1	MA0934.1.AHL25	11.8126	0.984615	Ma08_g02860	884	891	+	ATTTAATT
MA0934.1	MA0934.1.AHL25	11.8126	0.984615	Ma08_g02860	884	891	-	AATTAAAT
MA1071.1	MA1071.1.DOF5.3	7.03585	0.98442	Ma08_g02860	1009	1015	+	TATAAAG
MA1071.1	MA1071.1.DOF5.3	7.03585	0.98442	Ma08_g02860	1053	1059	+	TATAAAG
MA1088.1	MA1088.1.WRKY48	9.27105	0.982682	Ma08_g02860	997	1006	+	AAGGTCAAAG
MA1017.1	MA1017.1.GATA8	9.5269	0.982222	Ma08_g02860	480	488	+	TAGATCTAG
MA1016.1	MA1016.1.GATA15	8.52208	0.981582	Ma08_g02860	1113	1121	-	TGTGATCAT
MA1078.1	MA1078.1.WRKY2	11.6992	0.979323	Ma08_g02860	1218	1225	-	CGGTCAAA
MA1071.1	MA1071.1.DOF5.3	6.91327	0.979006	Ma08_g02860	1150	1156	+	GTAAAAG
MA0981.1	MA0981.1.DOF1.8	7.89591	0.978877	Ma08_g02860	1076	1085	+	CAAAAAGTCA
MA1071.1	MA1071.1.DOF5.3	6.88301	0.977669	Ma08_g02860	959	965	+	GGAAAAG
MA1071.1	MA1071.1.DOF5.3	6.88301	0.977669	Ma08_g02860	1334	1340	-	GGAAAAG
MA1071.1	MA1071.1.DOF5.3	6.88301	0.977669	Ma08_g02860	1621	1627	-	GGAAAAG
MA0983.1	MA0983.1.DOF5.6	8.15919	0.976659	Ma08_g02860	463	470	+	GAAAAAGC
MA0932.1	MA0932.1.AHL12	10.3062	0.975757	Ma08_g02860	445	452	+	AAAAAATT
MA0932.1	MA0932.1.AHL12	10.3062	0.975757	Ma08_g02860	445	452	-	AATTTTTT
MA0932.1	MA0932.1.AHL12	10.3062	0.975757	Ma08_g02860	614	621	+	AATTTTTT
MA0932.1	MA0932.1.AHL12	10.3062	0.975757	Ma08_g02860	614	621	-	AAAAAATT
MA0983.1	MA0983.1.DOF5.6	8.13153	0.975642	Ma08_g02860	959	966	+	GGAAAAGT
MA0968.1	MA0968.1.BZIP68	9.71205	0.97549	Ma08_g02860	1543	1551	-	TTACGTGGC
MA1071.1	MA1071.1.DOF5.3	6.83078	0.975362	Ma08_g02860	732	738	+	ATAAAAG
MA1094.1	MA1094.1.WRKY8	10.2916	0.975157	Ma08_g02860	998	1006	+	AGGTCAAAG
MA0932.1	MA0932.1.AHL12	10.2686	0.974856	Ma08_g02860	613	620	+	AAATTTTT
MA0932.1	MA0932.1.AHL12	10.2686	0.974856	Ma08_g02860	613	620	-	AAAAATTT
MA0982.1	MA0982.1.DOF2.4	7.57764	0.974833	Ma08_g02860	464	470	+	AAAAAGC
MA1093.1	MA1093.1.WRKY75	11.0807	0.973572	Ma08_g02860	998	1005	+	AGGTCAAA
MA1071.1	MA1071.1.DOF5.3	6.78824	0.973483	Ma08_g02860	1139	1145	+	GCAAAAG
MA1016.1	MA1016.1.GATA15	8.2965	0.973318	Ma08_g02860	1112	1120	+	AATGATCAC
MA1016.1	MA1016.1.GATA15	8.26849	0.972291	Ma08_g02860	837	845	+	CATGATCTA
MA1093.1	MA1093.1.WRKY75	10.9694	0.971271	Ma08_g02860	1218	1225	-	CGGTCAAA
MA0982.1	MA0982.1.DOF2.4	7.48714	0.97104	Ma08_g02860	960	966	+	GAAAAGT
MA1077.1	MA1077.1.WRKY18	11.4253	0.970997	Ma08_g02860	997	1006	+	AAGGTCAAAG
MA0983.1	MA0983.1.DOF5.6	7.96356	0.96947	Ma08_g02860	570	577	+	ATTAAAGT
MA1076.1	MA1076.1.WRKY15	10.9239	0.968514	Ma08_g02860	998	1007	+	AGGTCAAAGG
MA1071.1	MA1071.1.DOF5.3	6.66014	0.967824	Ma08_g02860	560	566	+	GTTAAAG
MA1041.1	MA1041.1.MYB55	12.566	0.966876	Ma08_g02860	1437	1444	+	ACCAACCG
MA0981.1	MA0981.1.DOF1.8	7.58891	0.966225	Ma08_g02860	19	28	+	GAAAAAGTCT
MA0933.1	MA0933.1.AHL20	11.4011	0.96586	Ma08_g02860	907	914	+	AATAAAAT
MA0981.1	MA0981.1.DOF1.8	7.5634	0.965174	Ma08_g02860	570	579	+	ATTAAAGTGG
MA0984.1	MA0984.1.DOF5.7	8.48344	0.964437	Ma08_g02860	1152	1159	+	AAAAGAGA
MA0951.1	MA0951.1.ATHB-16	12.2423	0.964256	Ma08_g02860	290	297	+	TAATGATT
MA1071.1	MA1071.1.DOF5.3	6.57765	0.964181	Ma08_g02860	570	576	+	ATTAAAG
MA1020.1	MA1020.1.GT-1	12.2699	0.963524	Ma08_g02860	1716	1723	+	GTTAACCC
MA0970.1	MA0970.1.CAMTA3	9.23273	0.963345	Ma08_g02860	1761	1769	+	CCGTGTCAT
MA1081.1	MA1081.1.WRKY25	11.7646	0.963219	Ma08_g02860	1218	1225	-	CGGTCAAA
MA0981.1	MA0981.1.DOF1.8	7.51327	0.963108	Ma08_g02860	1009	1018	+	TATAAAGTCA
MA1016.1	MA1016.1.GATA15	7.96815	0.961288	Ma08_g02860	737	745	-	TATGATCCT
MA0983.1	MA0983.1.DOF5.6	7.72924	0.96086	Ma08_g02860	993	1000	+	CATAAAGG
MA0975.1	MA0975.1.CRF2	11.9468	0.960756	Ma08_g02860	1404	1411	+	TCGCCGCC
MA1079.1	MA1079.1.WRKY21	10.6999	0.960649	Ma08_g02860	997	1006	+	AAGGTCAAAG
MA1088.1	MA1088.1.WRKY48	8.52994	0.958206	Ma08_g02860	1217	1226	-	TCGGTCAAAA
MA1017.1	MA1017.1.GATA8	8.7406	0.957211	Ma08_g02860	1608	1616	+	GAGATCCAT
MA0953.1	MA0953.1.ATHB-6	9.54209	0.957206	Ma08_g02860	902	910	+	ACAATAATA
MA1049.1	MA1049.1.ERF094	11.1634	0.957128	Ma08_g02860	1405	1412	+	CGCCGCCC
MA1092.1	MA1092.1.WRKY63	11.1576	0.956882	Ma08_g02860	1218	1225	-	CGGTCAAA
MA1071.1	MA1071.1.DOF5.3	6.41161	0.956846	Ma08_g02860	1754	1760	-	TAAAACG
MA0982.1	MA0982.1.DOF2.4	7.14305	0.956617	Ma08_g02860	234	240	+	AAAAAGA
MA0982.1	MA0982.1.DOF2.4	7.14305	0.956617	Ma08_g02860	1230	1236	+	AAAAAGA
MA1017.1	MA1017.1.GATA8	8.71593	0.956427	Ma08_g02860	479	487	-	TAGATCTAT
MA1089.1	MA1089.1.WRKY57	11.3075	0.955927	Ma08_g02860	997	1006	+	AAGGTCAAAG
MA0982.1	MA0982.1.DOF2.4	7.12615	0.955909	Ma08_g02860	994	1000	+	ATAAAGG
MA0982.1	MA0982.1.DOF2.4	7.12615	0.955909	Ma08_g02860	1054	1060	+	ATAAAGG
MA0982.1	MA0982.1.DOF2.4	7.12129	0.955706	Ma08_g02860	571	577	+	TTAAAGT
MA0953.1	MA0953.1.ATHB-6	9.46865	0.954941	Ma08_g02860	291	299	-	CTAATCATT
MA0983.1	MA0983.1.DOF5.6	7.56198	0.954713	Ma08_g02860	1053	1060	+	TATAAAGG
MA0990.1	MA0990.1.HDG11	11.691	0.953563	Ma08_g02860	202	211	-	AAATTAATGT
MA0984.1	MA0984.1.DOF5.7	8.11379	0.953418	Ma08_g02860	496	503	-	AAAAAATG
MA0932.1	MA0932.1.AHL12	9.33169	0.952416	Ma08_g02860	511	518	+	AATATTTT
MA0932.1	MA0932.1.AHL12	9.33169	0.952416	Ma08_g02860	511	518	-	AAAATATT
MA0932.1	MA0932.1.AHL12	9.33169	0.952416	Ma08_g02860	672	679	+	AAAATATT
MA0932.1	MA0932.1.AHL12	9.33169	0.952416	Ma08_g02860	672	679	-	AATATTTT
MA0932.1	MA0932.1.AHL12	9.33169	0.952416	Ma08_g02860	674	681	+	AATATTTT
MA0932.1	MA0932.1.AHL12	9.33169	0.952416	Ma08_g02860	674	681	-	AAAATATT
MA0983.1	MA0983.1.DOF5.6	7.49634	0.952301	Ma08_g02860	1620	1627	-	GGAAAAGC
MA1004.1	MA1004.1.ERF13	10.6799	0.952205	Ma08_g02860	1405	1412	+	CGCCGCCC
MA1016.1	MA1016.1.GATA15	7.70852	0.951776	Ma08_g02860	1633	1641	-	TAAGATCAG
MA0969.1	MA0969.1.CAMTA2	9.32198	0.950345	Ma08_g02860	1758	1766	+	TTACCGTGT
MA0983.1	MA0983.1.DOF5.6	7.44305	0.950343	Ma08_g02860	233	240	+	AAAAAAGA
MA0983.1	MA0983.1.DOF5.6	7.44305	0.950343	Ma08_g02860	1229	1236	+	AAAAAAGA
MA1026.2	MA1026.2.ATHB-15	17.5641	0.950253	Ma08_g02860	285	299	+	GATAATAATGATTAG
MA1807.1	MA1807.1.ZHD10	15.0609	0.98884	Ma08_g04720	1377	1387	+	TTTAATTAATG
MA1757.1	MA1757.1.HDG7	14.6963	0.972211	Ma08_g04720	1378	1388	-	ACATTAATTAA
MA1804.1	MA1804.1.WIN1	10.5972	0.970735	Ma08_g04720	1151	1160	+	CCGCCGCGGT
MA2008.1	MA2008.1.MYB99	13.189	0.963293	Ma08_g04720	1980	1989	-	ATCACCTACC
MA1736.1	MA1736.1.AT5G04390	11.0455	0.959821	Ma08_g04720	1278	1288	+	CATCATCACTC
MA1801.1	MA1801.1.TREE1	10.39	0.959177	Ma08_g04720	100	110	+	AGGTAGCTAAG
MA1780.1	MA1780.1.MYB92	12.0015	0.954696	Ma08_g04720	1980	1989	-	ATCACCTACC
MA1796.1	MA1796.1.RAP2-7	10.1739	0.954345	Ma08_g04720	1939	1946	+	TGCGAGGA
MA1757.1	MA1757.1.HDG7	13.5129	0.954036	Ma08_g04720	626	636	+	TCATTTATTGT
MA1753.1	MA1753.1.ERF057	18.1528	0.952915	Ma08_g04720	833	847	+	CCACCTCCGCCGTCT
MA1795.1	MA1795.1.RAP2-4	10.506	0.950018	Ma08_g04720	1989	1
MA1201.1	MA1201.1.AGL42	12.3116	1	Ma08_g18570	1164	1170	+	CATCATC
MA1201.1	MA1201.1.AGL42	12.3116	1	Ma08_g18570	1807	1813	-	CATCATC
MA1201.1	MA1201.1.AGL42	12.3116	1	Ma08_g18570	1810	1816	-	CATCATC
MA1202.1	MA1202.1.AGL55	11.2098	1	Ma08_g18570	81	86	-	TCACCA
MA1202.1	MA1202.1.AGL55	11.2098	1	Ma08_g18570	886	891	-	TCACCA
MA1388.1	MA1388.1.PHL2	10.8673	0.980468	Ma08_g18570	1323	1330	-	AGAATATT
MA1388.1	MA1388.1.PHL2	10.8673	0.980468	Ma08_g18570	1364	1371	-	AGAATATT
MA1276.1	MA1276.1.DOF3.5	13.7455	0.97983	Ma08_g18570	276	286	+	CAAAAAGTTAC
MA1272.2	MA1272.2.DOF2.2	13.1825	0.979361	Ma08_g18570	275	284	+	ACAAAAAGTT
MA1206.1	MA1206.1.ARF2	11.0749	0.969833	Ma08_g18570	1434	1443
MA2016.1	MA2016.1.GRF6	14.0137	0.983011	Ma08_g27730	363	372	+	ATCTGACAAA
MA1706.1	MA1706.1.AT1G14600	11.5533	0.979813	Ma08_g27730	1161	1170	-	ATATATTCTA
MA1767.1	MA1767.1.MYB23	13.1146	0.973822	Ma08_g27730	973	983	+	CCAACAACCAC
MA1780.1	MA1780.1.MYB92	12.7978	0.970703	Ma08_g27730	1626	1635	+	CACACCTAAC
MA1751.1	MA1751.1.EIL3	13.614	0.970677	Ma08_g27730	1137	1147	-	GAGGTTCATTG
MA1661.1	MA1661.1.GTL1	15.2742	0.97031	Ma08_g27730	802	813	+	AAGGTAAAAAAA
MA1779.1	MA1779.1.MYB83	13.9554	0.970082	Ma08_g27730	973	983	+	CCAACAACCAC
MA2043.1	MA2043.1.NAC004	13.2012	0.968874	Ma08_g27730	1259	1269	+	AACAAGAAAAG
MA1706.1	MA1706.1.AT1G14600	10.9631	0.967334	Ma08_g27730	1335	1344	-	AAATATTCTA
MA2008.1	MA2008.1.MYB99	13.3843	0.966964	Ma08_g27730	1626	1635	+	CACACCTAAC
MA1805.1	MA1805.1.WRKY53	11.5121	0.966155	Ma08_g27730	1717	1725	+	GGTCAACCC
MA1736.1	MA1736.1.AT5G04390	11.3183	0.965832	Ma08_g27730	1010	1020	+	CTCCATCACTA
MA1706.1	MA1706.1.AT1G14600	10.8492	0.964927	Ma08_g27730	1417	1426	-	CTACATTCCT
MA2034.1	MA2034.1.NAC057	12.757	0.962862	Ma08_g27730	946	956	-	ATCAAGTAAAT
MA1706.1	MA1706.1.AT1G14600	10.7352	0.962515	Ma08_g27730	714	723	-	TAACATTCTC
MA2037.1	MA2037.1.NAC096	12.846	0.958361	Ma08_g27730	946	956	-	ATCAAGTAAAT
MA1775.1	MA1775.1.MYB61	13.2768	0.957624	Ma08_g27730	971	983	+	ATCCAACAACCAC
MA2011.1	MA2011.1.ERF010	14.0228	0.957154	Ma08_g27730	1769	1780	+	ACCACCGCCACC
MA2049.1	MA2049.1.NAC053	12.9116	0.955503	Ma08_g27730	1259	1270	+	AACAAGAAAAGG
MA1706.1	MA1706.1.AT1G14600	10.259	0.952448	Ma08_g27730	1842	1851	+	CAACATTCCT
MA1737.1	MA1737.1.AT5G05090	10.8412	0.951266	Ma08_g27730	1470	1480	+	CAAGATACGGT
MA1735.1	MA1735.1.AT2G38300	13.3785	0.951175	Ma08_g27730	712	72
MA0008.1	MA0008.1.HAT5	11.6187	0.962517	Ma09_g04790	827	834	+	TAATTATT
MA0008.1	MA0008.1.HAT5	11.3671	0.954587	Ma09_g04790	332	339	-	GAATTATT
MA0121.1	MA0121.1.ARR10	8.9439	0.961122	Ma09_g04790	1886	1893	+	AGATTCGA
MA0581.1	MA0581.1.LEC2	12.3546	0.951286	Ma09_g04790	71	81	-	TCCATGCAACT
MA0932.1	MA0932.1.AHL12	11.2807	0.999099	Ma09_g04790	331	338	+	AAATAATT
MA0932.1	MA0932.1.AHL12	11.2807	0.999099	Ma09_g04790	331	338	-	AATTATTT
MA0932.1	MA0932.1.AHL12	11.2807	0.999099	Ma09_g04790	600	607	+	AATTATTT
MA0932.1	MA0932.1.AHL12	11.2807	0.999099	Ma09_g04790	600	607	-	AAATAATT
MA0932.1	MA0932.1.AHL12	11.2807	0.999099	Ma09_g04790	828	835	+	AATTATTT
MA0932.1	MA0932.1.AHL12	11.2807	0.999099	Ma09_g04790	828	835	-	AAATAATT
MA0932.1	MA0932.1.AHL12	11.2431	0.998197	Ma09_g04790	83	90	+	AAATATTT
MA0932.1	MA0932.1.AHL12	11.2431	0.998197	Ma09_g04790	83	90	-	AAATATTT
MA0932.1	MA0932.1.AHL12	10.3062	0.975757	Ma09_g04790	599	606	+	AAATTATT
MA0932.1	MA0932.1.AHL12	10.3062	0.975757	Ma09_g04790	599	606	-	AATAATTT
MA0932.1	MA0932.1.AHL12	10.3062	0.975757	Ma09_g04790	649	656	+	AAATTATT
MA0932.1	MA0932.1.AHL12	10.3062	0.975757	Ma09_g04790	649	656	-	AATAATTT
MA0932.1	MA0932.1.AHL12	9.36933	0.953317	Ma09_g04790	371	378	+	AATATATT
MA0932.1	MA0932.1.AHL12	9.36933	0.953317	Ma09_g04790	371	378	-	AATATATT
MA0932.1	MA0932.1.AHL12	9.36933	0.953317	Ma09_g04790	1012	1019	+	AATATATT
MA0932.1	MA0932.1.AHL12	9.36933	0.953317	Ma09_g04790	1012	1019	-	AATATATT
MA0932.1	MA0932.1.AHL12	9.33169	0.952416	Ma09_g04790	41	48	+	AAAATATT
MA0932.1	MA0932.1.AHL12	9.33169	0.952416	Ma09_g04790	41	48	-	AATATTTT
MA0933.1	MA0933.1.AHL20	11.4011	0.96586	Ma09_g04790	38	45	+	AATAAAAT
MA0934.1	MA0934.1.AHL25	10.6316	0.958819	Ma09_g04790	331	338	+	AAATAATT
MA0934.1	MA0934.1.AHL25	10.6316	0.958819	Ma09_g04790	331	338	-	AATTATTT
MA0934.1	MA0934.1.AHL25	10.6316	0.958819	Ma09_g04790	600	607	+	AATTATTT
MA0934.1	MA0934.1.AHL25	10.6316	0.958819	Ma09_g04790	600	607	-	AAATAATT
MA0934.1	MA0934.1.AHL25	10.6316	0.958819	Ma09_g04790	828	835	+	AATTATTT
MA0934.1	MA0934.1.AHL25	10.6316	0.958819	Ma09_g04790	828	835	-	AAATAATT
MA0944.1	MA0944.1.ARF8	10.6256	0.971709	Ma09_g04790	1301	1309	-	GTTGTCGGA
MA0944.1	MA0944.1.ARF8	10.1733	0.959568	Ma09_g04790	1740	1748	-	AATGTCGGA
MA0944.1	MA0944.1.ARF8	9.96718	0.954034	Ma09_g04790	1156	1164	+	CATGTCGGA
MA0945.1	MA0945.1.ARR1	10.5615	0.976942	Ma09_g04790	1885	1894	-	ATCGAATCTT
MA0946.1	MA0946.1.ARR11	12.5757	0.967106	Ma09_g04790	1885	1892	+	AAGATTCG
MA0949.1	MA0949.1.ARR2	13.1021	0.976707	Ma09_g04790	1884	1893	-	TCGAATCTTT
MA0951.1	MA0951.1.ATHB-16	12.4744	0.96855	Ma09_g04790	650	657	-	CAATAATT
MA0952.1	MA0952.1.ATHB-51	13.9389	1	Ma09_g04790	650	657	+	AATTATTG
MA0953.1	MA0953.1.ATHB-6	10.7476	0.99438	Ma09_g04790	650	658	-	CCAATAATT
MA0969.1	MA0969.1.CAMTA2	10.4533	0.981179	Ma09_g04790	1333	1341	-	TCACCGCGT
MA0970.1	MA0970.1.CAMTA3	10.1458	0.987546	Ma09_g04790	1330	1338	-	CCGCGTTTG
MA0972.1	MA0972.1.CCA1	15.2595	1	Ma09_g04790	217	224	+	AAATATCT
MA0977.1	MA0977.1.DOF2.5	10.688	0.954015	Ma09_g04790	528	535	-	ATAAGGTG
MA0981.1	MA0981.1.DOF1.8	7.62397	0.96767	Ma09_g04790	249	258	-	AAAAAAGGAG
MA0981.1	MA0981.1.DOF1.8	7.4809	0.961774	Ma09_g04790	66	75	+	TTTAAAGTTG
MA0981.1	MA0981.1.DOF1.8	7.42712	0.959558	Ma09_g04790	173	182	+	CATAAAGGAG
MA0981.1	MA0981.1.DOF1.8	7.29439	0.954088	Ma09_g04790	552	561	+	AAAAAAGAAA
MA0981.1	MA0981.1.DOF1.8	7.28596	0.95374	Ma09_g04790	363	372	-	TTTAAAGTTT
MA0981.1	MA0981.1.DOF1.8	7.26004	0.952672	Ma09_g04790	356	365	-	TTTAAAGTAT
MA0982.1	MA0982.1.DOF2.4	7.37996	0.966547	Ma09_g04790	251	257	-	AAAAAGG
MA0982.1	MA0982.1.DOF2.4	7.14305	0.956617	Ma09_g04790	291	297	-	AAAAAGA
MA0982.1	MA0982.1.DOF2.4	7.14305	0.956617	Ma09_g04790	553	559	+	AAAAAGA
MA0982.1	MA0982.1.DOF2.4	7.12615	0.955909	Ma09_g04790	174	180	+	ATAAAGG
MA0982.1	MA0982.1.DOF2.4	7.12129	0.955706	Ma09_g04790	67	73	+	TTAAAGT
MA0982.1	MA0982.1.DOF2.4	7.12129	0.955706	Ma09_g04790	358	364	-	TTAAAGT
MA0982.1	MA0982.1.DOF2.4	7.12129	0.955706	Ma09_g04790	365	371	-	TTAAAGT
MA0983.1	MA0983.1.DOF5.6	7.90926	0.967474	Ma09_g04790	251	258	-	AAAAAAGG
MA0983.1	MA0983.1.DOF5.6	7.81273	0.963927	Ma09_g04790	66	73	+	TTTAAAGT
MA0983.1	MA0983.1.DOF5.6	7.81273	0.963927	Ma09_g04790	358	365	-	TTTAAAGT
MA0983.1	MA0983.1.DOF5.6	7.81273	0.963927	Ma09_g04790	365	372	-	TTTAAAGT
MA0983.1	MA0983.1.DOF5.6	7.7761	0.962581	Ma09_g04790	137	144	-	AAAAACGT
MA0983.1	MA0983.1.DOF5.6	7.72924	0.96086	Ma09_g04790	173	180	+	CATAAAGG
MA0983.1	MA0983.1.DOF5.6	7.59609	0.955967	Ma09_g04790	720	727	-	CATAACGT
MA0983.1	MA0983.1.DOF5.6	7.44305	0.950343	Ma09_g04790	291	298	-	AAAAAAGA
MA0983.1	MA0983.1.DOF5.6	7.44305	0.950343	Ma09_g04790	552	559	+	AAAAAAGA
MA0984.1	MA0984.1.DOF5.7	8.99005	0.979538	Ma09_g04790	251	258	-	AAAAAAGG
MA0984.1	MA0984.1.DOF5.7	8.80025	0.97388	Ma09_g04790	564	571	+	AAAAGATG
MA0984.1	MA0984.1.DOF5.7	8.70367	0.971001	Ma09_g04790	152	159	-	AAAAGAGT
MA0984.1	MA0984.1.DOF5.7	8.48344	0.964437	Ma09_g04790	1733	1740	-	AAAAGAGA
MA0984.1	MA0984.1.DOF5.7	8.11379	0.953418	Ma09_g04790	1745	1752	-	AAAAAATG
MA0995.1	MA0995.1.ERF039	11.1134	0.97374	Ma09_g04790	1315	1324	+	GCGTCGGTGG
MA1009.1	MA1009.1.ARF3	13.9955	1	Ma09_g04790	1300	1307	-	TGTCGGAA
MA1009.1	MA1009.1.ARF3	13.9955	1	Ma09_g04790	1739	1746	-	TGTCGGAA
MA1009.1	MA1009.1.ARF3	12.0071	0.956738	Ma09_g04790	1158	1165	+	TGTCGGAT
MA1013.1	MA1013.1.GATA10	14.2342	1	Ma09_g04790	1718	1725	+	TAGATCTG
MA1014.1	MA1014.1.GATA11	14.3904	1	Ma09_g04790	1718	1725	+	TAGATCTG
MA1015.1	MA1015.1.GATA12	10.1412	0.987343	Ma09_g04790	1718	1725	+	TAGATCTG
MA1015.1	MA1015.1.GATA12	10.1412	0.987343	Ma09_g04790	1718	1725	-	CAGATCTA
MA1016.1	MA1016.1.GATA15	8.6442	0.986056	Ma09_g04790	952	960	+	TGTGATCGG
MA1016.1	MA1016.1.GATA15	8.18667	0.969294	Ma09_g04790	1075	1083	+	TGTGATCCA
MA1016.1	MA1016.1.GATA15	7.85787	0.957247	Ma09_g04790	898	906	-	GACGATCAA
MA1016.1	MA1016.1.GATA15	7.79928	0.955101	Ma09_g04790	120	128	-	TTCGATCAG
MA1016.1	MA1016.1.GATA15	7.79401	0.954908	Ma09_g04790	1407	1415	-	AATGATCCA
MA1017.1	MA1017.1.GATA8	9.33533	0.976128	Ma09_g04790	1717	1725	-	CAGATCTAC
MA1017.1	MA1017.1.GATA8	8.65963	0.954636	Ma09_g04790	1718	1726	+	TAGATCTGT
MA1017.1	MA1017.1.GATA8	8.56778	0.951714	Ma09_g04790	1666	1674	+	TCGATCTAG
MA1017.1	MA1017.1.GATA8	8.5658	0.951651	Ma09_g04790	1228	1236	+	GCGATCCAA
MA1018.1	MA1018.1.GATA9	13.1517	0.965681	Ma09_g04790	1716	1726	+	TGTAGATCTGT
MA1026.1	MA1026.1.ATHB-15	12.4353	1	Ma09_g04790	827	834	+	TAATTATT
MA1027.1	MA1027.1.KAN1	10.0461	0.995439	Ma09_g04790	1758	1765	+	AAATATTC
MA1027.1	MA1027.1.KAN1	9.0316	0.96094	Ma09_g04790	327	334	-	ATTTATTC
MA1037.1	MA1037.1.MYB24	9.25408	0.950643	Ma09_g04790	756	764	+	GTATTAGGT
MA1041.1	MA1041.1.MYB55	14.1596	1	Ma09_g04790	1184	1191	+	ACCTACCG
MA1042.1	MA1042.1.MYB59	12.6699	0.986104	Ma09_g04790	758	765	+	ATTAGGTA
MA1071.1	MA1071.1.DOF5.3	7.30606	0.996356	Ma09_g04790	252	258	-	AAAAAAG
MA1071.1	MA1071.1.DOF5.3	7.30606	0.996356	Ma09_g04790	292	298	-	AAAAAAG
MA1071.1	MA1071.1.DOF5.3	7.30606	0.996356	Ma09_g04790	552	558	+	AAAAAAG
MA1071.1	MA1071.1.DOF5.3	7.05293	0.985175	Ma09_g04790	173	179	+	CATAAAG
MA1071.1	MA1071.1.DOF5.3	6.88301	0.977669	Ma09_g04790	1736	1742	-	GGAAAAG
MA1071.1	MA1071.1.DOF5.3	6.78824	0.973483	Ma09_g04790	1255	1261	-	GCAAAAG
MA1071.1	MA1071.1.DOF5.3	6.78344	0.973271	Ma09_g04790	155	161	-	TGAAAAG
MA1071.1	MA1071.1.DOF5.3	6.70574	0.969839	Ma09_g04790	562	568	+	ACAAAAG
MA1071.1	MA1071.1.DOF5.3	6.56057	0.963426	Ma09_g04790	66	72	+	TTTAAAG
MA1071.1	MA1071.1.DOF5.3	6.56057	0.963426	Ma09_g04790	359	365	-	TTTAAAG
MA1071.1	MA1071.1.DOF5.3	6.56057	0.963426	Ma09_g04790	366	372	-	TTTAAAG
MA1071.1	MA1071.1.DOF5.3	6.42869	0.957601	Ma09_g04790	138	144	-	AAAAACG
MA1071.1	MA1071.1.DOF5.3	6.42869	0.957601	Ma09_g04790	1047	1053	-	AAAAACG
MA1071.1	MA1071.1.DOF5.3	6.42869	0.957601	Ma09_g04790	1711	1717	-	CAAAACG
MA1076.1	MA1076.1.WRKY15	11.4019	0.982017	Ma09_g04790	1106	1115	+	GAGTCAACGC
MA1077.1	MA1077.1.WRKY18	11.305	0.968177	Ma09_g04790	571	580	-	ACAGTCAACC
MA1077.1	MA1077.1.WRKY18	10.9513	0.959885	Ma09_g04790	1105	1114	+	CGAGTCAACG
MA1078.1	MA1078.1.WRKY2	11.3021	0.970608	Ma09_g04790	572	579	-	CAGTCAAC
MA1078.1	MA1078.1.WRKY2	10.6431	0.956147	Ma09_g04790	1106	1113	+	GAGTCAAC
MA1079.1	MA1079.1.WRKY21	11.3684	0.978072	Ma09_g04790	1105	1114	+	CGAGTCAACG
MA1079.1	MA1079.1.WRKY21	10.4887	0.955147	Ma09_g04790	571	580	-	ACAGTCAACC
MA1080.1	MA1080.1.WRKY23	14.4475	1	Ma09_g04790	1107	1114	+	AGTCAACG
MA1080.1	MA1080.1.WRKY23	12.1934	0.957707	Ma09_g04790	571	578	-	AGTCAACC
MA1081.1	MA1081.1.WRKY25	12.057	0.969417	Ma09_g04790	572	579	-	CAGTCAAC
MA1083.1	MA1083.1.WRKY30	13.2952	0.996526	Ma09_g04790	1107	1116	+	AGTCAACGCT
MA1083.1	MA1083.1.WRKY30	11.5842	0.954982	Ma09_g04790	569	578	-	AGTCAACCAT
MA1084.1	MA1084.1.WRKY38	12.7501	0.970161	Ma09_g04790	1107	1114	-	CGTTGACT
MA1085.1	MA1085.1.WRKY40	9.08284	0.990287	Ma09_g04790	572	579	-	CAGTCAAC
MA1085.1	MA1085.1.WRKY40	8.70733	0.977853	Ma09_g04790	1106	1113	+	GAGTCAAC
MA1086.1	MA1086.1.WRKY43	10.5596	0.962685	Ma09_g04790	1106	1115	+	GAGTCAACGC
MA1087.1	MA1087.1.WRKY45	14.1188	0.995192	Ma09_g04790	1107	1114	-	CGTTGACT
MA1088.1	MA1088.1.WRKY48	9.25574	0.982176	Ma09_g04790	1105	1114	+	CGAGTCAACG
MA1088.1	MA1088.1.WRKY48	8.85474	0.968933	Ma09_g04790	571	580	-	ACAGTCAACC
MA1093.1	MA1093.1.WRKY75	12.2474	0.997699	Ma09_g04790	572	579	-	CAGTCAAC
MA1093.1	MA1093.1.WRKY75	11.2915	0.977931	Ma09_g04790	1106	1113	+	GAGTCAAC
MA1094.1	MA1094.1.WRKY8	10.6479	0.985466	Ma09_g04790	1106	1114	+	GAGTCAACG
MA1094.1	MA1094.1.WRKY8	9.75348	0.959586	Ma09_g04790	571	579	-	CAGTCAACC
MA1164.1	MA1164.1.HHO5	14.3148	0.967031	Ma09_g04790	1599	1609	+	CCAAAGATTCC
MA1165.1	MA1165.1.HHO6	17.1021	1	Ma09_g04790	1881	1891	+	ATCAAAGATTC
MA1165.1	MA1165.1.HHO6	14.8932	0.958158	Ma09_g04790	1598	1608	+	ACCAAAGATTC
MA1175.1	MA1175.1.MYB81	12.5232	0.968688	Ma09_g04790	1396	1406	-	GTAACCGAAAT
MA1428.1	MA1428.1.TCP8	12.8699	1	Ma09_g07920	1768	1776	+	GGGGCCCAC
MA1755.1	MA1755.1.GATA4	9.80202	1	Ma09_g07920	1467	1476	+	ATAGATCTAT
MA1755.1	MA1755.1.GATA4	9.80202	1	Ma09_g07920	1467	1476	-	ATAGATCTAT
MA1659.1	MA1659.1.ABF4	14.1328	0.982279	Ma09_g07920	105	116	+	AGCCACGTCATA
MA1795.1	MA1795.1.RAP2-4	11.4722	0.972779	Ma09_g07920	123	132	+	CACCGCCCAA
MA1804.1	MA1804.1.WIN1	10.341	0.964178	Ma09_g07920	175	184	-	CCACCGCCAT
MA1736.1	MA1736.1.AT5G04390	11.1676	0.962512	Ma09_g07920	208	218	-	TACCATCACTT
MA1795.1	MA1795.1.RAP2-4	11.0012	0.961684	Ma09_g07920	1838	1847	-	CGCCGACAAA
MA1740.1	MA1740.1.BHLH49	12.6561	0.959115	Ma09_g07920	1674	1683	+	ACCACGTGCA
MA1676.2	MA1676.2.NAC062	14.7662	0.956813	Ma09_g07920	742	755	-	ATGATAAGTAATTA
MA1805.1	MA1805.1.WRKY53	11.0929	0.955858	Ma09_g07920	1134	1142	-	AGTCAACCT
MA1659.1	MA1659.1.ABF4	12.807	0.954475	Ma09_g07920	1869	1880	-	CGCCACGTGTCA
MA1428.1	MA1428.1.TCP8	11.0417	0.954113	Ma09_g07920	1851	1859	-	AGGCCCCAC
MA1659.1	MA1659.1.ABF4	12.7724	0.953749	Ma09_g07920	1594	1605	-	AGCCACGTGGCC
MA1659.1	MA1659.1.ABF4	12.7464	0.953203	Ma09_g07920	1647	1658	-	ATCCACGTGACA
MA1767.1	MA1767.1.MYB23	12.0397	0.952837	Ma09_g07920	1825	1835	-	ACAACTAAATC
MA2038.1	MA2038.1.NAC103	12.4383	0.952536	Ma09_g07920	1258	1268	-	CACAAGTTAGA
MA1805.1	MA1805.1.WRKY53	10.9264	0.951765	Ma09_g07920	53	61	+	AGTCAACTA
MA1796.1	MA1796.1.RAP2-7	10.0182	0.951333	Ma09_g07920	282	289	-	TACTAGGT
MA1748.1	MA1748.1.DREB1F	11.0984	0.950981	Ma09_g07920	1839	18
MA1428.1	MA1428.1.TCP8	12.8699	1	Ma09_g24370	1679	1687	+	GGGGCCCAC
MA1677.1	MA1677.1.NAC078	14.6615	0.98596	Ma09_g24370	360	371	-	ATCAAGAAACAA
MA2051.1	MA2051.1.NAC68	14.2215	0.983002	Ma09_g24370	899	910	-	TTACAAGTATGA
MA1428.1	MA1428.1.TCP8	12.1239	0.981277	Ma09_g24370	1677	1685	-	GGGCCCCAC
MA2049.1	MA2049.1.NAC053	14.2279	0.979783	Ma09_g24370	360	371	-	ATCAAGAAACAA
MA2043.1	MA2043.1.NAC004	13.0657	0.966129	Ma09_g24370	361	371	-	ATCAAGAAACA
MA1755.1	MA1755.1.GATA4	8.78707	0.96364	Ma09_g24370	755	764	+	ACAGATCCAA
MA1755.1	MA1755.1.GATA4	8.78707	0.96364	Ma09_g24370	755	764	-	TTGGATCTGT
MA1793.1	MA1793.1.NID1	10.582	0.962603	Ma09_g24370	186	195	+	ATTATCCATT
MA2031.1	MA2031.1.AT5G04760	12.4929	0.954553	Ma09_g24370	11	21	-	AGCTTATCTAT
MA2031.1	MA2031.1.AT5G04760	12.3953	0.952553	Ma09_g24370	1324	1334	-	TTCTTATCATT
MA1755.1	MA1755.1.GATA4	8.46445	0.952083	Ma09_g24370	1817	1826	+	CTAGATCTTG
MA1755.1	MA1755.1.GATA4	8.46445	0.952083	Ma09_g24370	1817	1826	-	CAAGATCTAG
MA1677.1	MA1677.1.NAC078	12.8524	0.951894	Ma09_g24370	588	599	-	GCCAAGAAACAC
MA1755.1	MA1755.1.GATA4	8.41731	0.950394	Ma09_g24370	1312	1321	+	ACAGATCTCA
MA1755.1	MA1755.1.GATA4	8.41731	0.950394	Ma09_g24370	1312	132
MA2043.1	MA2043.1.NAC004	13.8369	0.981748	Ma09_g01640	1179	1189	+	CACAAGAAATA
MA2049.1	MA2049.1.NAC053	14.3306	0.981677	Ma09_g01640	1179	1190	+	CACAAGAAATAA
MA1677.1	MA1677.1.NAC078	14.2046	0.977356	Ma09_g01640	1179	1190	+	CACAAGAAATAA
MA1802.1	MA1802.1.TRP5	11.0868	0.972066	Ma09_g01640	370	379	-	ATTAAACCCC
MA1661.1	MA1661.1.GTL1	15.2742	0.97031	Ma09_g01640	628	639	+	AAGGTAAAAAAA
MA1706.1	MA1706.1.AT1G14600	10.9521	0.967102	Ma09_g01640	40	49	-	AAATATTCTT
MA1682.1	MA1682.1.TCX3	19.2555	0.966121	Ma09_g01640	387	400	+	AAAAATTCAAAATT
MA1802.1	MA1802.1.TRP5	10.8477	0.965253	Ma09_g01640	1230	1239	+	GTTAAACCCA
MA2052.1	MA2052.1.ZAT6	14.601	0.963648	Ma09_g01640	697	708	+	GAAATGATTGTA
MA2034.1	MA2034.1.NAC057	12.757	0.962862	Ma09_g01640	216	226	+	ATCAAGTAAAA
MA1736.1	MA1736.1.AT5G04390	10.9663	0.958076	Ma09_g01640	1190	1200	-	TAATATCACTT
MA1796.1	MA1796.1.RAP2-7	10.1739	0.954345	Ma09_g01640	1036	1043	-	TGCGAGGA
MA1674.2	MA1674.2.NAC017	12.776	0.952092	Ma09_g01640	215	226	+	AATCAAGTAAAA
MA1755.1	MA1755.1.GATA4	8.41731	0.950394	Ma09_g01640	1943	1952	+	TCAGATCTCT
MA1755.1	MA1755.1.GATA4	8.41731	0.950394	Ma09_g01640	1943	1952	-	AGAGATCTGA
MA2037.1	MA2037.1.NAC096	12.4853	0.950333	Ma09_g01640	216	22
MA1799.1	MA1799.1.SPL10	11.677	0.975254	Ma09_g23550	1646	1655	-	ATGTACGGTC
MA1795.1	MA1795.1.RAP2-4	11.5168	0.97383	Ma09_g23550	501	510	-	CGCCGACCAG
MA1804.1	MA1804.1.WIN1	10.4459	0.966862	Ma09_g23550	719	728	+	GCGCCGCAGC
MA1795.1	MA1795.1.RAP2-4	11.0531	0.962907	Ma09_g23550	404	413	+	AACCGACCAT
MA1428.1	MA1428.1.TCP8	11.3379	0.961548	Ma09_g23550	1396	1404	+	TGGCCCCAC
MA1804.1	MA1804.1.WIN1	9.96218	0.954481	Ma09_g23550	307	316	+	CCGCCACCGT
MA1661.1	MA1661.1.GTL1	14.418	0.954352	Ma09_g23550	1580	1591	-	AAGGTAAAAAAG
MA1805.1	MA1805.1.WRKY53	11.0307	0.954328	Ma09_g23550	1775	1783	+	GGTCAACAC
MA1805.1	MA1805.1.WRKY53	11.0307	0.954328	Ma09_g23550	1848	1856
MA1802.1	MA1802.1.TRP5	12.0673	1	Ma10_g09480	1863	1872	+	CTTAAACCCT
MA1745.1	MA1745.1.BZIP63	15.3809	1	Ma10_g09480	1401	1412	+	TGCTGACGTGGC
MA2031.1	MA2031.1.AT5G04760	14.5207	0.996123	Ma10_g09480	1436	1446	-	ATCTTATCCTA
MA1672.1	MA1672.1.GBF2	15.7941	0.989306	Ma10_g09480	1403	1415	+	CTGACGTGGCAAA
MA1743.1	MA1743.1.BZIP2	21.5991	0.985251	Ma10_g09480	1399	1413	+	GGTGCTGACGTGGCA
MA2010.1	MA2010.1.SMB	12.946	0.981191	Ma10_g09480	1614	1624	+	ATCAAGCAAGC
MA1757.1	MA1757.1.HDG7	15.2789	0.98116	Ma10_g09480	623	633	-	ACATTAAATGT
MA1659.1	MA1659.1.ABF4	13.9859	0.979196	Ma10_g09480	1402	1413	-	TGCCACGTCAGC
MA1659.1	MA1659.1.ABF4	13.9643	0.978744	Ma10_g09480	748	759	-	GGCCACGTCATC
MA2044.1	MA2044.1.NAC007	12.8073	0.976766	Ma10_g09480	1614	1624	+	ATCAAGCAAGC
MA2036.1	MA2036.1.NAC076	13.0853	0.973982	Ma10_g09480	1614	1625	+	ATCAAGCAAGCA
MA1796.1	MA1796.1.RAP2-7	10.9809	0.969964	Ma10_g09480	760	767	+	GACGAGGT
MA1775.1	MA1775.1.MYB61	14.0071	0.969621	Ma10_g09480	943	955	+	CGCCACCTACCAT
MA2005.1	MA2005.1.NAC016	12.312	0.968592	Ma10_g09480	1614	1624	+	ATCAAGCAAGC
MA1795.1	MA1795.1.RAP2-4	11.2094	0.966589	Ma10_g09480	638	647	+	CACCGTCCAT
MA1755.1	MA1755.1.GATA4	8.84712	0.965792	Ma10_g09480	1313	1322	+	ATAGATCTTT
MA1755.1	MA1755.1.GATA4	8.84712	0.965792	Ma10_g09480	1313	1322	-	AAAGATCTAT
MA2032.1	MA2032.1.TRB1	14.8729	0.96561	Ma10_g09480	1950	1960	+	ATAACCCTAAA
MA1745.1	MA1745.1.BZIP63	13.7606	0.965424	Ma10_g09480	747	758	+	CGATGACGTGGC
MA2047.1	MA2047.1.NAC037	12.7318	0.965415	Ma10_g09480	1614	1624	+	ATCAAGCAAGC
MA1737.1	MA1737.1.AT5G05090	11.503	0.965408	Ma10_g09480	1828	1838	+	AAAGATCCGAC
MA1807.1	MA1807.1.ZHD10	13.761	0.965348	Ma10_g09480	26	36	+	CTTAATTAGTC
MA1786.1	MA1786.1.NAC019	9.30926	0.962767	Ma10_g09480	136	145	+	ATCACGGAAT
MA1748.1	MA1748.1.DREB1F	11.3665	0.957445	Ma10_g09480	1152	1160	+	TGCCGACCT
MA1766.1	MA1766.1.MYB17	15.5743	0.953782	Ma10_g09480	944	958	+	GCCACCTACCATCTT
MA1793.1	MA1793.1.NID1	10.2862	0.953435	Ma10_g09480	1435	1444	-	CTTATCCTAT
MA1762.1	MA1762.1.MYB10	14.6454	0.953163	Ma10_g09480	943	956	+	CGCCACCTACCATC
MA1757.1	MA1757.1.HDG7	13.3386	0.951358	Ma10_g09480	623	633	+	ACATTTAATGT
MA1737.1	MA1737.1.AT5G05090	12.0562	0.977231	Ma10_g07950	118	128	+	CTAGATTCGTA
MA1661.1	MA1661.1.GTL1	15.3265	0.971285	Ma10_g07950	547	558	+	GAGGTTAAAATT
MA1767.1	MA1767.1.MYB23	12.9449	0.97051	Ma10_g07950	591	601	-	TCAACAAAATC
MA1767.1	MA1767.1.MYB23	12.8734	0.969114	Ma10_g07950	924	934	+	TCAACAACTTT
MA2049.1	MA2049.1.NAC053	13.3795	0.964133	Ma10_g07950	507	518	+	ATCAAGAAATTA
MA1677.1	MA1677.1.NAC078	13.3609	0.961468	Ma10_g07950	507	518	+	ATCAAGAAATTA
MA2049.1	MA2049.1.NAC053	13.1219	0.959383	Ma10_g07950	725	736	-	TCCAAGAAAGAT
MA1757.1	MA1757.1.HDG7	13.7694	0.957975	Ma10_g07950	1705	1715	+	TCATTAAATTT
MA1736.1	MA1736.1.AT5G04390	10.9356	0.957398	Ma10_g07950	1437	1447	+	CTATATCACTT
MA1772.1	MA1772.1.MYB43	14.7715	0.956958	Ma10_g07950	880	892	-	GTTCACCAAATTT
MA1737.1	MA1737.1.AT5G05090	11.0499	0.955726	Ma10_g07950	356	366	-	GCAGATCCGAG
MA2049.1	MA2049.1.NAC053	12.8958	0.955212	Ma10_g07950	624	635	+	GTCAAGAAAACT
MA1796.1	MA1796.1.RAP2-7	10.1739	0.954345	Ma10_g07950	1241	1248	+	TGCGAGGA
MA1677.1	MA1677.1.NAC078	12.9541	0.953808	Ma10_g07950	725	736	-	TCCAAGAAAGAT
MA1767.1	MA1767.1.MYB23	12.0893	0.953806	Ma10_g07950	572	582	-	ACAACAAAAAA
MA1780.1	MA1780.1.MYB92	11.8585	0.951821	Ma10_g07950	783	792	-	ATAACCTAAC
MA2043.1	MA2043.1.NAC004	12.3583	0.951802	Ma10_g07950	507	517	+	ATCAAGAAATT
MA1751.1	MA1751.1.EIL3	12.7044	0.951616	Ma10_g07950	1045	1
MA1795.1	MA1795.1.RAP2-4	12.6276	1	Ma10_g04000	1930	1939	+	CACCGACCAT
MA2018.1	MA2018.1.NAC69	14.918	0.988778	Ma10_g04000	593	604	+	TAACAAGGCATT
MA1662.1	MA1662.1.AT3G10030	15.566	0.977647	Ma10_g04000	1800	1812	-	AATTAACAGACAT
MA1755.1	MA1755.1.GATA4	9.03116	0.972385	Ma10_g04000	859	868	+	TTAGATCCAA
MA1755.1	MA1755.1.GATA4	9.03116	0.972385	Ma10_g04000	859	868	-	TTGGATCTAA
MA2049.1	MA2049.1.NAC053	13.5511	0.967299	Ma10_g04000	1765	1776	-	ACCAAGAAAAAT
MA1755.1	MA1755.1.GATA4	8.84057	0.965557	Ma10_g04000	1700	1709	+	TTAGATCTTT
MA1755.1	MA1755.1.GATA4	8.84057	0.965557	Ma10_g04000	1700	1709	-	AAAGATCTAA
MA1677.1	MA1677.1.NAC078	13.5089	0.964254	Ma10_g04000	1765	1776	-	ACCAAGAAAAAT
MA1805.1	MA1805.1.WRKY53	11.2751	0.960332	Ma10_g04000	71	79	+	AGTCAACTG
MA1786.1	MA1786.1.NAC019	9.21677	0.960128	Ma10_g04000	503	512	-	TACACGAAAC
MA1802.1	MA1802.1.TRP5	10.4266	0.953256	Ma10_g04000	135	144	-	CAAAAACCTC
MA1772.1	MA1772.1.MYB43	14.3602	0.951152	Ma10_g04000	1910	1
MA0982.1	MA0982.1.DOF2.4	8.1781	1	Ma11_g14300	1149	1155	+	AAAAAGT
MA0984.1	MA0984.1.DOF5.7	9.6765	1	Ma11_g14300	498	505	-	AAAAGAGG
MA1071.1	MA1071.1.DOF5.3	7.38855	1	Ma11_g14300	1769	1775	+	GAAAAAG
MA0972.1	MA0972.1.CCA1	15.2595	1	Ma11_g14300	1192	1199	-	AAATATCT
MA0561.1	MA0561.1.PIF4	13.7721	1	Ma11_g14300	84	91	+	CACGTGGC
MA0951.1	MA0951.1.ATHB-16	14.1743	1	Ma11_g14300	1416	1423	-	TAATAATT
MA1026.1	MA1026.1.ATHB-15	12.4353	1	Ma11_g14300	1415	1422	+	TAATTATT
MA0932.1	MA0932.1.AHL12	11.2807	0.999099	Ma11_g14300	542	549	+	AAATAATT
MA0932.1	MA0932.1.AHL12	11.2807	0.999099	Ma11_g14300	542	549	-	AATTATTT
MA0932.1	MA0932.1.AHL12	11.2807	0.999099	Ma11_g14300	1559	1566	+	AAATAATT
MA0932.1	MA0932.1.AHL12	11.2807	0.999099	Ma11_g14300	1559	1566	-	AATTATTT
MA0570.2	MA0570.2.ABF1	17.4188	0.997874	Ma11_g14300	83	94	+	ACACGTGGCAAT
MA1071.1	MA1071.1.DOF5.3	7.30606	0.996356	Ma11_g14300	957	963	+	AAAAAAG
MA1071.1	MA1071.1.DOF5.3	7.30606	0.996356	Ma11_g14300	1187	1193	+	AAAAAAG
MA1071.1	MA1071.1.DOF5.3	7.28898	0.995602	Ma11_g14300	1148	1154	+	TAAAAAG
MA1027.1	MA1027.1.KAN1	10.0461	0.995439	Ma11_g14300	225	232	-	AAATATTC
MA0964.1	MA0964.1.BIM1	10.6954	0.993464	Ma11_g14300	147	156	-	GCACGTGACT
MA0981.1	MA0981.1.DOF1.8	8.2407	0.993085	Ma11_g14300	1148	1157	+	TAAAAAGTAA
MA0983.1	MA0983.1.DOF5.6	8.60014	0.992862	Ma11_g14300	1148	1155	+	TAAAAAGT
MA0965.1	MA0965.1.BIM2	12.194	0.991523	Ma11_g14300	148	157	+	GTCACGTGCG
MA0965.1	MA0965.1.BIM2	12.194	0.991523	Ma11_g14300	148	157	-	CGCACGTGAC
MA1071.1	MA1071.1.DOF5.3	7.13542	0.988819	Ma11_g14300	629	635	+	GATAAAG
MA1071.1	MA1071.1.DOF5.3	7.13542	0.988819	Ma11_g14300	880	886	+	GATAAAG
MA1071.1	MA1071.1.DOF5.3	7.13542	0.988819	Ma11_g14300	1131	1137	+	GATAAAG
MA1039.1	MA1039.1.MYB4	12.1323	0.988195	Ma11_g14300	1936	1943	-	GGTTGGTG
MA0968.1	MA0968.1.BZIP68	10.0967	0.987444	Ma11_g14300	83	91	+	ACACGTGGC
MA1026.1	MA1026.1.ATHB-15	11.9711	0.987321	Ma11_g14300	1416	1423	-	TAATAATT
MA1071.1	MA1071.1.DOF5.3	7.05293	0.985175	Ma11_g14300	1062	1068	+	AATAAAG
MA0562.1	MA0562.1.PIF5	12.9636	0.984349	Ma11_g14300	149	156	+	TCACGTGC
MA0578.1	MA0578.1.SPL8	15.2896	0.984328	Ma11_g14300	1132	1147	-	TTTTTTGTACCTTTAT
MA0931.1	MA0931.1.ABI5	13.5765	0.980767	Ma11_g14300	83	92	-	TGCCACGTGT
MA1016.1	MA1016.1.GATA15	8.47649	0.979912	Ma11_g14300	138	146	+	GGTGATCAG
MA0956.1	MA0956.1.BEE2	10.1612	0.979223	Ma11_g14300	148	157	+	GTCACGTGCG
MA0956.1	MA0956.1.BEE2	10.1612	0.979223	Ma11_g14300	148	157	-	CGCACGTGAC
MA1085.1	MA1085.1.WRKY40	8.70733	0.977853	Ma11_g14300	847	854	+	GAGTCAAG
MA0983.1	MA0983.1.DOF5.6	8.16	0.976689	Ma11_g14300	1020	1027	-	ATAAAAGT
MA0932.1	MA0932.1.AHL12	10.3062	0.975757	Ma11_g14300	543	550	+	AATAATTT
MA0932.1	MA0932.1.AHL12	10.3062	0.975757	Ma11_g14300	543	550	-	AAATTATT
MA1071.1	MA1071.1.DOF5.3	6.83078	0.975362	Ma11_g14300	327	333	+	ATAAAAG
MA1071.1	MA1071.1.DOF5.3	6.83078	0.975362	Ma11_g14300	821	827	+	ATAAAAG
MA1071.1	MA1071.1.DOF5.3	6.83078	0.975362	Ma11_g14300	1021	1027	-	ATAAAAG
MA1071.1	MA1071.1.DOF5.3	6.83078	0.975362	Ma11_g14300	1234	1240	+	ATAAAAG
MA0983.1	MA0983.1.DOF5.6	8.11579	0.975064	Ma11_g14300	957	964	+	AAAAAAGC
MA1074.1	MA1074.1.UNE10	12.6502	0.974898	Ma11_g14300	149	156	+	TCACGTGC
MA0932.1	MA0932.1.AHL12	10.2686	0.974856	Ma11_g14300	1157	1164	+	AAATTTTT
MA0932.1	MA0932.1.AHL12	10.2686	0.974856	Ma11_g14300	1157	1164	-	AAAAATTT
MA0982.1	MA0982.1.DOF2.4	7.57764	0.974833	Ma11_g14300	958	964	+	AAAAAGC
MA1071.1	MA1071.1.DOF5.3	6.8137	0.974607	Ma11_g14300	1045	1051	+	TTAAAAG
MA0977.1	MA0977.1.DOF2.5	11.6199	0.974117	Ma11_g14300	1149	1156	+	AAAAAGTA
MA1071.1	MA1071.1.DOF5.3	6.80052	0.974025	Ma11_g14300	530	536	-	AGAAAAG
MA1071.1	MA1071.1.DOF5.3	6.80052	0.974025	Ma11_g14300	1755	1761	-	AGAAAAG
MA1071.1	MA1071.1.DOF5.3	6.80052	0.974025	Ma11_g14300	1774	1780	+	AGAAAAG
MA1071.1	MA1071.1.DOF5.3	6.78344	0.973271	Ma11_g14300	501	507	-	TGAAAAG
MA0990.1	MA0990.1.HDG11	12.5189	0.972723	Ma11_g14300	402	411	-	CATTAAATGC
MA1037.1	MA1037.1.MYB24	10.0794	0.972551	Ma11_g14300	1072	1080	-	AAATTAGGT
MA0559.1	MA0559.1.PI	18.7795	0.97141	Ma11_g14300	1209	1222	-	ACAAAAGAAGAAAA
MA0984.1	MA0984.1.DOF5.7	8.7013	0.970931	Ma11_g14300	1528	1535	-	GAAAGAGG
MA1175.1	MA1175.1.MYB81	12.6383	0.970839	Ma11_g14300	1396	1406	-	ATAACGGAATT
MA1071.1	MA1071.1.DOF5.3	6.70574	0.969839	Ma11_g14300	1216	1222	-	ACAAAAG
MA1016.1	MA1016.1.GATA15	8.19959	0.969767	Ma11_g14300	139	147	-	TCTGATCAC
MA1061.1	MA1061.1.SPT	11.6812	0.969216	Ma11_g14300	83	91	-	GCCACGTGT
MA0568.1	MA0568.1.MYC3	10.6622	0.96889	Ma11_g14300	83	90	+	ACACGTGG
MA0568.1	MA0568.1.MYC3	10.6622	0.96889	Ma11_g14300	83	90	-	CCACGTGT
MA1039.1	MA1039.1.MYB4	11.2685	0.96867	Ma11_g14300	134	141	+	AGTAGGTG
MA0981.1	MA0981.1.DOF1.8	7.62469	0.9677	Ma11_g14300	1018	1027	-	ATAAAAGTTT
MA0990.1	MA0990.1.HDG11	12.2594	0.966718	Ma11_g14300	403	412	+	CATTTAATGA
MA0982.1	MA0982.1.DOF2.4	7.37511	0.966344	Ma11_g14300	1020	1026	-	TAAAAGT
MA1016.1	MA1016.1.GATA15	8.10225	0.966201	Ma11_g14300	735	743	+	GATGATCGC
MA0966.1	MA0966.1.BIM3	11.3729	0.966119	Ma11_g14300	148	157	+	GTCACGTGCG
MA0966.1	MA0966.1.BIM3	11.3729	0.966119	Ma11_g14300	148	157	-	CGCACGTGAC
MA1174.1	MA1174.1.MYB56	16.7274	0.965633	Ma11_g14300	1396	1410	-	AAATATAACGGAATT
MA0984.1	MA0984.1.DOF5.7	8.48344	0.964437	Ma11_g14300	527	534	-	AAAAGAGA
MA1071.1	MA1071.1.DOF5.3	6.57765	0.964181	Ma11_g14300	447	453	+	ATTAAAG
MA1071.1	MA1071.1.DOF5.3	6.57765	0.964181	Ma11_g14300	1086	1092	+	CTTAAAG
MA0973.1	MA0973.1.CDF2	11.1366	0.964099	Ma11_g14300	1148	1157	+	TAAAAAGTAA
MA0981.1	MA0981.1.DOF1.8	7.53246	0.963899	Ma11_g14300	880	889	+	GATAAAGGTA
MA0981.1	MA0981.1.DOF1.8	7.53246	0.963899	Ma11_g14300	1131	1140	+	GATAAAGGTA
MA0964.1	MA0964.1.BIM1	9.72799	0.963741	Ma11_g14300	149	158	+	TCACGTGCGT
MA1071.1	MA1071.1.DOF5.3	6.56057	0.963426	Ma11_g14300	192	198	-	TTTAAAG
MA1061.1	MA1061.1.SPT	11.4336	0.963424	Ma11_g14300	149	157	-	CGCACGTGA
MA1027.1	MA1027.1.KAN1	9.10288	0.963364	Ma11_g14300	1440	1447	+	GTATATTC
MA0983.1	MA0983.1.DOF5.6	7.79253	0.963185	Ma11_g14300	122	129	-	CAAAACGT
MA0956.1	MA0956.1.BEE2	9.56964	0.963081	Ma11_g14300	82	91	+	AACACGTGGC
MA0956.1	MA0956.1.BEE2	9.56964	0.963081	Ma11_g14300	82	91	-	GCCACGTGTT
MA0560.1	MA0560.1.PIF3	13.3563	0.962626	Ma11_g14300	83	92	-	TGCCACGTGT
MA0974.1	MA0974.1.CDF3	10.6251	0.962604	Ma11_g14300	1149	1157	+	AAAAAGTAA
MA0008.1	MA0008.1.HAT5	11.6187	0.962517	Ma11_g14300	1415	1422	+	TAATTATT
MA1071.1	MA1071.1.DOF5.3	6.53031	0.962089	Ma11_g14300	515	521	-	TGTAAAG
MA0930.2	MA0930.2.ABF3	12.2106	0.962036	Ma11_g14300	84	93	+	CACGTGGCAA
MA0983.1	MA0983.1.DOF5.6	7.75622	0.961851	Ma11_g14300	880	887	+	GATAAAGG
MA0983.1	MA0983.1.DOF5.6	7.75622	0.961851	Ma11_g14300	1131	1138	+	GATAAAGG
MA0549.1	MA0549.1.BZR2	13.1514	0.961437	Ma11_g14300	82	92	+	AACACGTGGCA
MA0983.1	MA0983.1.DOF5.6	7.74085	0.961286	Ma11_g14300	514	521	-	TGTAAAGT
MA0952.1	MA0952.1.ATHB-51	12.0284	0.961226	Ma11_g14300	1433	1440	-	CATAATTG
MA0953.1	MA0953.1.ATHB-6	9.66362	0.960953	Ma11_g14300	1416	1424	-	CTAATAATT
MA0982.1	MA0982.1.DOF2.4	7.23333	0.960401	Ma11_g14300	514	520	-	GTAAAGT
MA1074.1	MA1074.1.UNE10	11.9115	0.95934	Ma11_g14300	83	90	-	CCACGTGT
MA0934.1	MA0934.1.AHL25	10.6316	0.958819	Ma11_g14300	542	549	+	AAATAATT
MA0934.1	MA0934.1.AHL25	10.6316	0.958819	Ma11_g14300	542	549	-	AATTATTT
MA0934.1	MA0934.1.AHL25	10.6316	0.958819	Ma11_g14300	1559	1566	+	AAATAATT
MA0934.1	MA0934.1.AHL25	10.6316	0.958819	Ma11_g14300	1559	1566	-	AATTATTT
MA0965.2	MA0965.2.BIM2	13.451	0.958777	Ma11_g14300	145	160	-	CAACGCACGTGACTCT
MA0965.2	MA0965.2.BIM2	13.4486	0.958733	Ma11_g14300	145	160	+	AGAGTCACGTGCGTTG
MA0981.1	MA0981.1.DOF1.8	7.38433	0.957794	Ma11_g14300	512	521	-	TGTAAAGTTT
MA1071.1	MA1071.1.DOF5.3	6.42869	0.957601	Ma11_g14300	123	129	-	CAAAACG
MA0962.1	MA0962.1.BHLH34	11.3418	0.957103	Ma11_g14300	83	90	+	ACACGTGG
MA0983.1	MA0983.1.DOF5.6	7.62526	0.957039	Ma11_g14300	662	669	+	TAAAACGT
MA1071.1	MA1071.1.DOF5.3	6.41161	0.956846	Ma11_g14300	662	668	+	TAAAACG
MA0981.1	MA0981.1.DOF1.8	7.35671	0.956656	Ma11_g14300	957	966	+	AAAAAAGCTC
MA0982.1	MA0982.1.DOF2.4	7.14305	0.956617	Ma11_g14300	1188	1194	+	AAAAAGA
MA0982.1	MA0982.1.DOF2.4	7.14305	0.956617	Ma11_g14300	1770	1776	+	AAAAAGA
MA0982.1	MA0982.1.DOF2.4	7.12615	0.955909	Ma11_g14300	881	887	+	ATAAAGG
MA0982.1	MA0982.1.DOF2.4	7.12615	0.955909	Ma11_g14300	1132	1138	+	ATAAAGG
MA1036.1	MA1036.1.MYB111	11.1597	0.955252	Ma11_g14300	134	141	+	AGTAGGTG
MA0981.1	MA0981.1.DOF1.8	7.32198	0.955225	Ma11_g14300	1769	1778	+	GAAAAAGAAA
MA0981.1	MA0981.1.DOF1.8	7.3203	0.955155	Ma11_g14300	1187	1196	+	AAAAAAGATA
MA0940.1	MA0940.1.AP1	15.8948	0.95489	Ma11_g14300	1210	1222	-	ACAAAAGAAGAAA
MA1027.1	MA1027.1.KAN1	8.85364	0.954888	Ma11_g14300	559	566	-	ACTTATTC
MA0008.1	MA0008.1.HAT5	11.3671	0.954587	Ma11_g14300	1560	1567	-	GAATTATT
MA0973.1	MA0973.1.CDF2	10.7552	0.954285	Ma11_g14300	957	966	+	AAAAAAGCTC
MA1016.1	MA1016.1.GATA15	7.77264	0.954125	Ma11_g14300	736	744	-	CGCGATCAT
MA0984.1	MA0984.1.DOF5.7	8.11379	0.953418	Ma11_g14300	196	203	+	AAAAAATG
MA0983.1	MA0983.1.DOF5.6	7.52481	0.953347	Ma11_g14300	821	828	+	ATAAAAGC
MA0962.1	MA0962.1.BHLH34	11.1516	0.953083	Ma11_g14300	149	156	-	GCACGTGA
MA0984.1	MA0984.1.DOF5.7	8.09023	0.952716	Ma11_g14300	957	964	+	AAAAAAGC
MA0932.1	MA0932.1.AHL12	9.33169	0.952416	Ma11_g14300	226	233	+	AATATTTT
MA0932.1	MA0932.1.AHL12	9.33169	0.952416	Ma11_g14300	226	233	-	AAAATATT
MA0983.1	MA0983.1.DOF5.6	7.48646	0.951938	Ma11_g14300	1769	1776	+	GAAAAAGA
MA0964.1	MA0964.1.BIM1	9.33529	0.951675	Ma11_g14300	81	90	-	CCACGTGTTC
MA0932.1	MA0932.1.AHL12	9.29406	0.951515	Ma11_g14300	1156	1163	+	AAAATTTT
MA0932.1	MA0932.1.AHL12	9.29406	0.951515	Ma11_g14300	1156	1163	-	AAAATTTT
MA0983.1	MA0983.1.DOF5.6	7.44305	0.950343	Ma11_g14300	1187	1194	+	AAAAAAGA
MA0982.1	MA0982.1.DOF2.4	8.1781	1	Ma11_g10400	1564	1570	+	AAAAAGT
MA0932.1	MA0932.1.AHL12	11.3183	1	Ma11_g10400	1527	1534	-	AATTAATT
MA0932.1	MA0932.1.AHL12	11.3183	1	Ma11_g10400	1527	1534	+	AATTAATT
MA0932.1	MA0932.1.AHL12	11.3183	1	Ma11_g10400	1531	1538	-	AATTAATT
MA0932.1	MA0932.1.AHL12	11.3183	1	Ma11_g10400	1531	1538	+	AATTAATT
MA0932.1	MA0932.1.AHL12	11.3183	1	Ma11_g10400	1535	1542	+	AATTAATT
MA0932.1	MA0932.1.AHL12	11.3183	1	Ma11_g10400	1535	1542	-	AATTAATT
MA0934.1	MA0934.1.AHL25	12.5169	1	Ma11_g10400	1527	1534	+	AATTAATT
MA0934.1	MA0934.1.AHL25	12.5169	1	Ma11_g10400	1527	1534	-	AATTAATT
MA0934.1	MA0934.1.AHL25	12.5169	1	Ma11_g10400	1531	1538	+	AATTAATT
MA0934.1	MA0934.1.AHL25	12.5169	1	Ma11_g10400	1531	1538	-	AATTAATT
MA0934.1	MA0934.1.AHL25	12.5169	1	Ma11_g10400	1535	1542	+	AATTAATT
MA0934.1	MA0934.1.AHL25	12.5169	1	Ma11_g10400	1535	1542	-	AATTAATT
MA1026.1	MA1026.1.ATHB-15	12.4353	1	Ma11_g10400	1556	1563	-	TAATTATT
MA0983.1	MA0983.1.DOF5.6	8.75098	0.998405	Ma11_g10400	1563	1570	+	AAAAAAGT
MA0932.1	MA0932.1.AHL12	11.2431	0.998197	Ma11_g10400	511	518	+	AAATATTT
MA0932.1	MA0932.1.AHL12	11.2431	0.998197	Ma11_g10400	511	518	-	AAATATTT
MA0981.1	MA0981.1.DOF1.8	8.33868	0.997123	Ma11_g10400	1563	1572	+	AAAAAAGTAA
MA1071.1	MA1071.1.DOF5.3	7.30606	0.996356	Ma11_g10400	1563	1569	+	AAAAAAG
MA1071.1	MA1071.1.DOF5.3	7.30606	0.996356	Ma11_g10400	1651	1657	+	AAAAAAG
MA1085.1	MA1085.1.WRKY40	9.25155	0.995873	Ma11_g10400	1677	1684	+	TGGTCAAA
MA1071.1	MA1071.1.DOF5.3	7.28898	0.995602	Ma11_g10400	1252	1258	+	TAAAAAG
MA0973.1	MA0973.1.CDF2	12.2695	0.993249	Ma11_g10400	1563	1572	+	AAAAAAGTAA
MA0982.1	MA0982.1.DOF2.4	7.92428	0.989362	Ma11_g10400	396	402	-	ATAAAGT
MA1071.1	MA1071.1.DOF5.3	7.13542	0.988819	Ma11_g10400	1152	1158	+	GATAAAG
MA1085.1	MA1085.1.WRKY40	8.9682	0.986491	Ma11_g10400	1941	1948	-	AAGTCAAG
MA1085.1	MA1085.1.WRKY40	8.95821	0.98616	Ma11_g10400	499	506	+	CAGTCAAA
MA0983.1	MA0983.1.DOF5.6	8.4037	0.985644	Ma11_g10400	396	403	-	TATAAAGT
MA1071.1	MA1071.1.DOF5.3	7.03585	0.98442	Ma11_g10400	397	403	-	TATAAAG
MA1024.1	MA1024.1.HAT1	13.8693	0.983211	Ma11_g10400	1453	1462	+	CCAATCATGA
MA0121.1	MA0121.1.ARR10	9.46314	0.980612	Ma11_g10400	1303	1310	+	AGATCCTC
MA0933.1	MA0933.1.AHL20	12.006	0.979338	Ma11_g10400	1527	1534	+	AATTAATT
MA0933.1	MA0933.1.AHL20	12.006	0.979338	Ma11_g10400	1527	1534	-	AATTAATT
MA0933.1	MA0933.1.AHL20	12.006	0.979338	Ma11_g10400	1531	1538	+	AATTAATT
MA0933.1	MA0933.1.AHL20	12.006	0.979338	Ma11_g10400	1531	1538	-	AATTAATT
MA0933.1	MA0933.1.AHL20	12.006	0.979338	Ma11_g10400	1535	1542	+	AATTAATT
MA0933.1	MA0933.1.AHL20	12.006	0.979338	Ma11_g10400	1535	1542	-	AATTAATT
MA1085.1	MA1085.1.WRKY40	8.75168	0.979322	Ma11_g10400	1216	1223	+	CAGTCAAT
MA1093.1	MA1093.1.WRKY75	11.2915	0.977931	Ma11_g10400	1690	1697	-	GAGTCAAC
MA1085.1	MA1085.1.WRKY40	8.70733	0.977853	Ma11_g10400	1690	1697	-	GAGTCAAC
MA1071.1	MA1071.1.DOF5.3	6.88301	0.977669	Ma11_g10400	849	855	-	GGAAAAG
MA1164.1	MA1164.1.HHO5	14.8269	0.977042	Ma11_g10400	690	700	+	CAGAAGATTCC
MA0932.1	MA0932.1.AHL12	10.3438	0.976659	Ma11_g10400	1523	1530	-	AATTTATT
MA0932.1	MA0932.1.AHL12	10.3438	0.976659	Ma11_g10400	1523	1530	+	AATAAATT
MA0932.1	MA0932.1.AHL12	10.3062	0.975757	Ma11_g10400	538	545	-	AATTTTTT
MA0932.1	MA0932.1.AHL12	10.3062	0.975757	Ma11_g10400	538	545	+	AAAAAATT
MA1016.1	MA1016.1.GATA15	8.35686	0.975529	Ma11_g10400	1718	1726	+	TATGATCCG
MA0932.1	MA0932.1.AHL12	10.2686	0.974856	Ma11_g10400	477	484	+	AAATTTTT
MA0932.1	MA0932.1.AHL12	10.2686	0.974856	Ma11_g10400	477	484	-	AAAAATTT
MA0932.1	MA0932.1.AHL12	10.2686	0.974856	Ma11_g10400	539	546	-	AAATTTTT
MA0932.1	MA0932.1.AHL12	10.2686	0.974856	Ma11_g10400	539	546	+	AAAAATTT
MA1071.1	MA1071.1.DOF5.3	6.8137	0.974607	Ma11_g10400	900	906	+	TTAAAAG
MA0977.1	MA0977.1.DOF2.5	11.6199	0.974117	Ma11_g10400	1564	1571	+	AAAAAGTA
MA1091.1	MA1091.1.WRKY62	12.9195	0.973937	Ma11_g10400	1677	1684	+	TGGTCAAA
MA1071.1	MA1071.1.DOF5.3	6.78824	0.973483	Ma11_g10400	1933	1939	-	GCAAAAG
MA1071.1	MA1071.1.DOF5.3	6.78344	0.973271	Ma11_g10400	765	771	+	TGAAAAG
MA0984.1	MA0984.1.DOF5.7	8.77668	0.973178	Ma11_g10400	846	853	-	AAAAGAGC
MA1088.1	MA1088.1.WRKY48	8.97629	0.972947	Ma11_g10400	1689	1698	-	AGAGTCAACC
MA1093.1	MA1093.1.WRKY75	11.0186	0.972287	Ma11_g10400	499	506	+	CAGTCAAA
MA0981.1	MA0981.1.DOF1.8	7.73516	0.972252	Ma11_g10400	394	403	-	TATAAAGTTT
MA0953.1	MA0953.1.ATHB-6	10.0176	0.971867	Ma11_g10400	1453	1461	+	CCAATCATG
MA1039.1	MA1039.1.MYB4	11.3978	0.971593	Ma11_g10400	1844	1851	+	GGTTGGTA
MA1168.1	MA1168.1.MYR2	15.5597	0.971298	Ma11_g10400	690	703	-	TAAGGAATCTTCTG
MA1093.1	MA1093.1.WRKY75	10.9694	0.971271	Ma11_g10400	1677	1684	+	TGGTCAAA
MA0983.1	MA0983.1.DOF5.6	8.00917	0.971146	Ma11_g10400	900	907	+	TTAAAAGT
MA0984.1	MA0984.1.DOF5.7	8.70367	0.971001	Ma11_g10400	1020	1027	-	AAAAGAGT
MA0984.1	MA0984.1.DOF5.7	8.7013	0.970931	Ma11_g10400	1307	1314	-	GAAAGAGG
MA1017.1	MA1017.1.GATA8	9.14523	0.970081	Ma11_g10400	1108	1116	-	AAGATCCGA
MA1071.1	MA1071.1.DOF5.3	6.70574	0.969839	Ma11_g10400	332	338	+	CCAAAAG
MA1071.1	MA1071.1.DOF5.3	6.70574	0.969839	Ma11_g10400	1023	1029	-	ACAAAAG
MA1071.1	MA1071.1.DOF5.3	6.70574	0.969839	Ma11_g10400	1279	1285	-	CCAAAAG
MA0121.1	MA0121.1.ARR10	9.16739	0.969511	Ma11_g10400	1108	1115	-	AGATCCGA
MA0934.1	MA0934.1.AHL25	11.1082	0.969229	Ma11_g10400	612	619	+	ATTTAAAT
MA0934.1	MA0934.1.AHL25	11.1082	0.969229	Ma11_g10400	612	619	-	ATTTAAAT
MA0934.1	MA0934.1.AHL25	11.1082	0.969229	Ma11_g10400	1464	1471	+	ATTTAAAT
MA0934.1	MA0934.1.AHL25	11.1082	0.969229	Ma11_g10400	1464	1471	-	ATTTAAAT
MA0934.1	MA0934.1.AHL25	11.1082	0.969229	Ma11_g10400	1518	1525	+	ATTTAAAT
MA0934.1	MA0934.1.AHL25	11.1082	0.969229	Ma11_g10400	1518	1525	-	ATTTAAAT
MA1016.1	MA1016.1.GATA15	8.17608	0.968906	Ma11_g10400	1823	1831	-	TATGATCTC
MA1071.1	MA1071.1.DOF5.3	6.66014	0.967824	Ma11_g10400	1206	1212	+	GTTAAAG
MA1020.1	MA1020.1.GT-1	12.4633	0.96733	Ma11_g10400	386	393	+	TTTAACCA
MA0982.1	MA0982.1.DOF2.4	7.37511	0.966344	Ma11_g10400	901	907	+	TAAAAGT
MA0933.1	MA0933.1.AHL20	11.4011	0.96586	Ma11_g10400	267	274	+	AATAAAAT
MA0933.1	MA0933.1.AHL20	11.4011	0.96586	Ma11_g10400	1372	1379	-	AATAAAAT
MA1078.1	MA1078.1.WRKY2	11.0402	0.964862	Ma11_g10400	1677	1684	+	TGGTCAAA
MA1027.1	MA1027.1.KAN1	9.12654	0.964169	Ma11_g10400	1555	1562	-	AATTATTC
MA1094.1	MA1094.1.WRKY8	9.89042	0.963548	Ma11_g10400	1689	1697	-	GAGTCAACC
MA0933.1	MA0933.1.AHL20	11.2859	0.963294	Ma11_g10400	612	619	+	ATTTAAAT
MA0933.1	MA0933.1.AHL20	11.2859	0.963294	Ma11_g10400	612	619	-	ATTTAAAT
MA0933.1	MA0933.1.AHL20	11.2859	0.963294	Ma11_g10400	1464	1471	+	ATTTAAAT
MA0933.1	MA0933.1.AHL20	11.2859	0.963294	Ma11_g10400	1464	1471	-	ATTTAAAT
MA0933.1	MA0933.1.AHL20	11.2859	0.963294	Ma11_g10400	1518	1525	+	ATTTAAAT
MA0933.1	MA0933.1.AHL20	11.2859	0.963294	Ma11_g10400	1518	1525	-	ATTTAAAT
MA1088.1	MA1088.1.WRKY48	8.6679	0.962762	Ma11_g10400	1676	1685	+	CTGGTCAAAC
MA0974.1	MA0974.1.CDF3	10.6251	0.962604	Ma11_g10400	1564	1572	+	AAAAAGTAA
MA0008.1	MA0008.1.HAT5	11.6187	0.962517	Ma11_g10400	1556	1563	-	TAATTATT
MA0934.1	MA0934.1.AHL25	10.7771	0.961995	Ma11_g10400	1523	1530	+	AATAAATT
MA0934.1	MA0934.1.AHL25	10.7771	0.961995	Ma11_g10400	1523	1530	-	AATTTATT
MA0983.1	MA0983.1.DOF5.6	7.75622	0.961851	Ma11_g10400	1152	1159	+	GATAAAGG
MA1079.1	MA1079.1.WRKY21	10.6815	0.96017	Ma11_g10400	1689	1698	-	AGAGTCAACC
MA1085.2	MA1085.2.WRKY40	12.1814	0.959621	Ma11_g10400	1940	1949	-	CAAGTCAAGA
MA1020.1	MA1020.1.GT-1	12.0664	0.959518	Ma11_g10400	1729	1736	-	CTTAACCA
MA1076.1	MA1076.1.WRKY15	10.6018	0.959414	Ma11_g10400	1688	1697	-	GAGTCAACCG
MA0950.1	MA0950.1.ATHB-12	11.5035	0.959139	Ma11_g10400	1454	1461	-	CATGATTG
MA1077.1	MA1077.1.WRKY18	10.9175	0.959092	Ma11_g10400	1676	1685	+	CTGGTCAAAC
MA0954.1	MA0954.1.ATHB-7	12.8884	0.958763	Ma11_g10400	1453	1462	+	CCAATCATGA
MA1027.1	MA1027.1.KAN1	8.96153	0.958557	Ma11_g10400	1610	1617	-	TAATATTC
MA0945.1	MA0945.1.ARR1	9.91005	0.958438	Ma11_g10400	1302	1311	-	AGAGGATCTT
MA1080.1	MA1080.1.WRKY23	12.1934	0.957707	Ma11_g10400	1689	1696	-	AGTCAACC
MA0982.1	MA0982.1.DOF2.4	7.14305	0.956617	Ma11_g10400	1253	1259	+	AAAAAGA
MA0982.1	MA0982.1.DOF2.4	7.14305	0.956617	Ma11_g10400	1652	1658	+	AAAAAGA
MA1078.1	MA1078.1.WRKY2	10.6431	0.956147	Ma11_g10400	1690	1697	-	GAGTCAAC
MA0982.1	MA0982.1.DOF2.4	7.12615	0.955909	Ma11_g10400	1153	1159	+	ATAAAGG
MA1016.1	MA1016.1.GATA15	7.79242	0.95485	Ma11_g10400	488	496	+	TTTGATCTA
MA0981.1	MA0981.1.DOF1.8	7.30482	0.954518	Ma11_g10400	900	909	+	TTAAAAGTCA
MA1163.1	MA1163.1.PHL11	15.7132	0.953361	Ma11_g10400	690	703	-	TAAGGAATCTTCTG
MA0932.1	MA0932.1.AHL12	9.33169	0.952416	Ma11_g10400	310	317	+	AAAATATT
MA0932.1	MA0932.1.AHL12	9.33169	0.952416	Ma11_g10400	310	317	-	AATATTTT
MA0932.1	MA0932.1.AHL12	9.33169	0.952416	Ma11_g10400	510	517	+	AAAATATT
MA0932.1	MA0932.1.AHL12	9.33169	0.952416	Ma11_g10400	510	517	-	AATATTTT
MA0932.1	MA0932.1.AHL12	9.33169	0.952416	Ma11_g10400	512	519	-	AAAATATT
MA0932.1	MA0932.1.AHL12	9.33169	0.952416	Ma11_g10400	512	519	+	AATATTTT
MA0932.1	MA0932.1.AHL12	9.29406	0.951515	Ma11_g10400	476	483	+	AAAATTTT
MA0932.1	MA0932.1.AHL12	9.29406	0.951515	Ma11_g10400	476	483	-	AAAATTTT
MA0581.1	MA0581.1.LEC2	12.3546	0.951286	Ma11_g10400	177	187	-	TCCATGCAACT
MA1083.1	MA1083.1.WRKY30	11.4102	0.950757	Ma11_g10400	1687	1696	-	AGTCAACCGA
MA0984.1	MA0984.1.DOF5.7	8.01722	0.95054	Ma11_g10400	1563	1570	+	AAAAAAGT
MA0983.1	MA0983.1.DOF5.6	7.44305	0.950343	Ma11_g10400	1651	1658	+	AAAAAAGA
MA1093.1	MA1093.1.WRKY75	9.95191	0.950229	Ma11_g10400	1216	1223	+	CAGTCAAT
MA1081.1	MA1081.1.WRKY25	11.1465	0.950117	Ma11_g10400	1677	1684	+	TGGTCAAA
MA1755.1	MA1755.1.GATA4	9.78892	0.99953	Ma11_g19150	1581	1590	+	TTAGATCTAA
MA1755.1	MA1755.1.GATA4	9.78892	0.99953	Ma11_g19150	1581	1590	-	TTAGATCTAA
MA2043.1	MA2043.1.NAC004	14.6771	0.998766	Ma11_g19150	12	22	+	AACAAGAAACA
MA2010.1	MA2010.1.SMB	13.4379	0.992309	Ma11_g19150	681	691	-	ATCAAGCAATC
MA1767.1	MA1767.1.MYB23	13.9576	0.990282	Ma11_g19150	871	881	+	TCAACAACCTT
MA2044.1	MA2044.1.NAC007	13.3195	0.988377	Ma11_g19150	681	691	-	ATCAAGCAATC
MA1677.1	MA1677.1.NAC078	14.6435	0.98562	Ma11_g19150	12	23	+	AACAAGAAACAG
MA1767.1	MA1767.1.MYB23	13.6981	0.985214	Ma11_g19150	1103	1113	-	TCAACTAACTT
MA2047.1	MA2047.1.NAC037	13.587	0.984027	Ma11_g19150	681	691	-	ATCAAGCAATC
MA2049.1	MA2049.1.NAC053	14.4548	0.983968	Ma11_g19150	12	23	+	AACAAGAAACAG
MA2005.1	MA2005.1.NAC016	12.7765	0.979658	Ma11_g19150	681	691	-	ATCAAGCAATC
MA2016.1	MA2016.1.GRF6	13.4144	0.971162	Ma11_g19150	544	553	+	CTCTGACAAT
MA2036.1	MA2036.1.NAC076	12.9171	0.97026	Ma11_g19150	680	691	-	ATCAAGCAATCC
MA2016.1	MA2016.1.GRF6	12.8572	0.960146	Ma11_g19150	66	75	-	TACTGACAAA
MA1805.1	MA1805.1.WRKY53	11.1901	0.958246	Ma11_g19150	611	619	+	GGTCAACTG
MA2049.1	MA2049.1.NAC053	12.9592	0.956382	Ma11_g19150	162	173	+	ACCAAGAAATGA
MA1677.1	MA1677.1.NAC078	12.9354	0.953456	Ma11_g19150	162	173	+	ACCAAGAAATGA
MA2038.1	MA2038.1.NAC103	12.4621	0.953083	Ma11_g19150	1100	1110	+	ATCAAGTTAGT
MA1737.1	MA1737.1.AT5G05090	10.8313	0.951055	Ma11_g19150	1606	16
MA2020.1	MA2020.1.HSFB4	17.0805	0.986776	Ma11_g21240	25	36	-	AGAAGTTTCCAA
MA1807.1	MA1807.1.ZHD10	14.9449	0.986745	Ma11_g21240	458	468	-	TTTAATTAATA
MA1753.1	MA1753.1.ERF057	20.5673	0.986183	Ma11_g21240	128	142	-	CCACCACCACCGCCA
MA2043.1	MA2043.1.NAC004	14.0143	0.985342	Ma11_g21240	448	458	+	TACAAGAAATT
MA1767.1	MA1767.1.MYB23	13.3847	0.979096	Ma11_g21240	828	838	-	TCAACAACCAT
MA2019.1	MA2019.1.HSFA1B	16.4921	0.977682	Ma11_g21240	26	37	+	TGGAAACTTCTA
MA2049.1	MA2049.1.NAC053	14.0415	0.976344	Ma11_g21240	448	459	+	TACAAGAAATTA
MA1753.1	MA1753.1.ERF057	19.7629	0.9751	Ma11_g21240	122	136	-	CCACCGCCACCGCCG
MA1786.1	MA1786.1.NAC019	9.72875	0.974738	Ma11_g21240	1956	1965	-	CGCACGGAAT
MA1671.1	MA1671.1.ERF118	15.0985	0.974533	Ma11_g21240	119	129	-	CACCGCCGCCT
MA2008.1	MA2008.1.MYB99	13.7319	0.973495	Ma11_g21240	1878	1887	+	CCCACCTACC
MA1677.1	MA1677.1.NAC078	13.9468	0.972501	Ma11_g21240	448	459	+	TACAAGAAATTA
MA1753.1	MA1753.1.ERF057	19.3858	0.969904	Ma11_g21240	119	133	-	CCGCCACCGCCGCCT
MA1807.1	MA1807.1.ZHD10	13.9211	0.968241	Ma11_g21240	559	569	+	CATAATTAATC
MA1428.1	MA1428.1.TCP8	11.5043	0.965723	Ma11_g21240	1874	1882	+	CGGCCCCAC
MA1804.1	MA1804.1.WIN1	10.3279	0.963842	Ma11_g21240	121	130	-	CCACCGCCGC
MA2034.1	MA2034.1.NAC057	12.763	0.962994	Ma11_g21240	1165	1175	-	GACAAGTAATG
MA1786.1	MA1786.1.NAC019	9.31447	0.962916	Ma11_g21240	793	802	+	AACACGTAAA
MA1786.1	MA1786.1.NAC019	9.21327	0.960028	Ma11_g21240	658	667	+	CATACGGCAC
MA1780.1	MA1780.1.MYB92	12.1238	0.957156	Ma11_g21240	1878	1887	+	CCCACCTACC
MA2011.1	MA2011.1.ERF010	14.0228	0.957154	Ma11_g21240	126	137	-	ACCACCGCCACC
MA1805.1	MA1805.1.WRKY53	11.1156	0.956415	Ma11_g21240	326	334	+	AGTCAACAC
MA1768.1	MA1768.1.MYB30	16.2221	0.955192	Ma11_g21240	135	149	-	GTTTCAACCACCACC
MA2037.1	MA2037.1.NAC096	12.6977	0.95506	Ma11_g21240	1165	1175	-	GACAAGTAATG
MA1748.1	MA1748.1.DREB1F	11.2388	0.954366	Ma11_g21240	42	50	+	TGCCGACAA
MA1804.1	MA1804.1.WIN1	9.85171	0.951654	Ma11_g21240	1933	1942
MA1182.1	MA1182.1.RVE8	16.062	0.957455	Ma11_g10840	1293	1304	+	AGATATTTTAGG
MA1183.1	MA1183.1.RVE6	16.029	0.959893	Ma11_g10840	1293	1303	+	AGATATTTTAG
MA1185.1	MA1185.1.LHY	16.0298	0.98307	Ma11_g10840	1293	1302	+	AGATATTTTA
MA1187.1	MA1187.1.RVE4	16.5488	0.97505	Ma11_g10840	1293	1302	+	AGATATTTTA
MA1190.1	MA1190.1.RVE5	15.8754	0.95806	Ma11_g10840	1293	1303	+	AGATATTTTAG
MA1201.1	MA1201.1.AGL42	11.4903	0.976944	Ma11_g10840	98	104	-	CATCATT
MA1206.1	MA1206.1.ARF2	10.2377	0.951319	Ma11_g10840	207	216	+	AGCAGACAAC
MA1206.1	MA1206.1.ARF2	10.2377	0.951319	Ma11_g10840	269	278	+	AGCAGACAAC
MA1324.1	MA1324.1.GATA20	13.1061	0.985871	Ma11_g10840	1438	1445	+	ATCCGATC
MA1324.1	MA1324.1.GATA20	12.2657	0.964817	Ma11_g10840	1069	1076	-	ATCAGATC
MA1351.2	MA1351.2.GBF3	15.0245	0.98667	Ma11_g10840	1140	1150	-	CACGTGGCAAC
MA1359.2	MA1359.2.BPE	13.7253	0.958483	Ma11_g10840	1141	1154	-	ATAGCACGTGGCAA
MA1359.2	MA1359.2.BPE	13.675	0.957363	Ma11_g10840	1141	1154	+	TTGCCACGTGCTAT
MA1360.2	MA1360.2.BHLH74	13.5607	0.993815	Ma11_g10840	1141	1154	-	ATAGCACGTGGCAA
MA1360.2	MA1360.2.BHLH74	12.7028	0.974441	Ma11_g10840	1159	1172	-	AGAGCACGTGACTA
MA1360.2	MA1360.2.BHLH74	12.6459	0.973155	Ma11_g10840	1141	1154	+	TTGCCACGTGCTAT
MA1360.2	MA1360.2.BHLH74	12.2466	0.964137	Ma11_g10840	1159	1172	+	TAGTCACGTGCTCT
MA1362.1	MA1362.1.bHLH77	15.5872	0.970044	Ma11_g10840	1156	1170	+	CAGTAGTCACGTGCT
MA1362.1	MA1362.1.bHLH77	15.1028	0.960655	Ma11_g10840	1138	1152	+	CAGTTGCCACGTGCT
MA1365.2	MA1365.2.AT5G47660	13.7864	0.963017	Ma11_g10840	1204	1214	-	TGGGTAAAAAA
MA1372.1	MA1372.1.ZAT10	10.9871	0.95325	Ma11_g10840	1773	1783	-	CACACACACTC
MA1388.1	MA1388.1.PHL2	11.7409	1	Ma11_g10840	710	717	+	AGAATCTG
MA1388.1	MA1388.1.PHL2	11.5186	0.99503	Ma11_g10840	1414	1421	-	AGAATCTA
MA1388.1	MA1388.1.PHL2	10.9574	0.982482	Ma11_g10840	73	80	-	CGAATCTG
MA1388.1	MA1388.1.PHL2	10.8673	0.980468	Ma11_g10840	140	147	-	AGAATATT
MA1388.1	MA1388.1.PHL2	10.6863	0.976419	Ma11_g10840	1122	1129	-	CGAATCTT
MA1391.1	MA1391.1.MYB33	12.3798	0.958163	Ma11_g10840	1312	1322	+	ATAACCAAATA
MA1402.1	MA1402.1.BPC6	34.0508	0.974756	Ma11_g10840	1797	1817	-	CCCTCTCTCTCTCTCTCTCTC
MA1402.1	MA1402.1.BPC6	31.9918	0.956083	Ma11_g10840	1795	1815	-	CTCTCTCTCTCTCTCTCTCAC
MA1427.1	MA1427.1.NAC028	13.8658	0.996254	Ma11_g10840	184	192	-	GTTGCGTGT
