# Supplementary material for: Transcriptome analysis provides insight into the regulatory mechanisms underlying pollen germination recovery at normal high ambient temperature in wild banana (Musa itinerans)
Source: Front Plant Sci. 2023 Sep 26;14:1255418. doi: 10.3389/fpls.2023.1255418 (PMC10562711; doi:10.3389/fpls.2023.1255418)
Supplement: Supplementary Table 7 — The TFBS enrichment analysis of 14 differentially expressed MYBs. [file Table_7.xlsx]

## Sheet: Sheet1
	footprintDB template	Source	Organisms	Blast e-value	Interface similarity	Interface residues	Interface sequence	footprinDB PWM / Consensus	Pfam domains
Ma01_g01960	AtMYB96: AtMYB96 / Myb transcription factor / MYB96 transcription factor-like protein / Putative transcription factor	AthaMYB 1.0	Arabidopsis thaliana	0.02	2023-07-16	49, 50, 51, 52, 54, 55, 58, 59, 60, 67, 100, 101, 102, 103, 105, 106, 109, 110, 111	...(44)tglrrCSKScRLrwTNYlrpgikRgnfteheektivhlqallgnrwaaiasylperTDNDiKNywNTHlkkkl(116)...	AtMYB15_I / AtMYB96_I: wwcaGTTr	*14-61: PF00249 (Myb-like DNA-binding domain)
								AtMYB94_II / AtMYB96_II: GtTAGTTG
Ma01_g19370	AtMYB96: AtMYB96 / Myb transcription factor / MYB96 transcription factor-like protein / Putative transcription factor	AthaMYB 1.0	Arabidopsis thaliana	0.015	2023-07-16	49, 50, 51, 52, 54, 55, 58, 59, 60, 67, 100, 101, 102, 103, 105, 106, 109, 110, 111	...(44)tglrrCSKScRLrwTNYlrpgikRgnfteheektivhlqallgnrwaaiasylperTDNDiKNywNTHlkkkl(116)...	AtMYB15_I / AtMYB96_I: wwcaGTTr	*14-61: PF00249 (Myb-like DNA-binding domain)
								AtMYB94_II / AtMYB96_II: GtTAGTTG
Ma03_g15540	AtMYB79: AtMYB79 / Myb domain protein 79 / Myb-like protein / Putative myb protein	AthaMYB 1.0	Arabidopsis thaliana	0.011	2023-01-01	8	...(3)eevwrKgpwta(13)...	AtMYB0_I / AtMYB103_I / AtMYB124_I / AtMYB18_I / AtMYB26_I / AtMYB43_I / AtMYB49_I / AtMYB50_I / AtMYB51_I / AtMYB67_I / AtMYB79_I / AtMYB82_I / AtMYB83_I / AtMYB89_I / AtMYB95_I: awmAGTTr	*8-55: PF00249 (Myb-like DNA-binding domain)
								AtMYB40_II / AtMYB43_II / AtMYB47_II / AtMYB79_II / AtMYB91_II: rbTrGTTr
Ma04_g24060	AtMYB4: AtMYB4 / Myb-related protein 4 / Transcription repressor MYB4	AthaMYB 1.0	Arabidopsis thaliana	4e-84	20 / 20	14, 49, 51, 52, 54, 55, 58, 59, 60, 67, 82, 100, 101, 102, 103, 105, 106, 109, 110, 111	...(9)kahtnKgawtkeederlvayikahgegcwrslpkaagllrCgKScRLrwINYlrpdlkRgnfteeedeliiklHsllgnkwsliagrlpgrTDNEiKNywNTHirrkl(116)...	AtMYB4_I: rymAGTTA	*14-61: PF00249 (Myb-like DNA-binding domain)
: Ma04_g28610	AtMYB112: AtMYB112 / Myb domain protein 112 / MYB transcription factor / Putative transcription factor MYB112	AthaMYB 1.0	Arabidopsis thaliana	1e-77	17 / 17	34, 69, 70, 71, 72, 74, 75, 78, 79, 80, 121, 122, 125, 126, 129, 130, 131	...(29)eieirRgpwtveedmklvsyislhgegrwnslsrsaglnrTGKScRLrwLNYlrpdirrgdislqeqfiilelhsrwgnrwskiaqhlpgrtDNeiKNywRTRvqkha(136)...	AtMYB102_I / AtMYB107_I / AtMYB112_I / AtMYB113_I / AtMYB114_I / AtMYB118_I / AtMYB11_I / AtMYB123_I / AtMYB13_I / AtMYB14_I / AtMYB22_I / AtMYB32_I / AtMYB33_I / AtMYB36_I / AtMYB39_I / AtMYB40_I / AtMYB41_I / AtMYB42_I / AtMYB47_I / AtMYB48_I / AtMYB52_I / AtMYB54_I / AtMYB55_I / AtMYB56_I / AtMYB59_I / AtMYB5_I / AtMYB61_I / AtMYB68_I / AtMYB74_I / AtMYB75_I / AtMYB81_I / AtMYB86_I / AtMYB90_I…	*34-81: PF00249 (Myb-like DNA-binding domain)
Ma06_g03670	AtMYB36: At5g57620 / AtMYB36 / MYB transcription factor / Myb-related transcription factor-like protein / Putative transcription factor MYB36	AthaMYB 1.0	Arabidopsis thaliana	1e-100	17 / 17	14, 50, 52, 53, 55, 56, 59, 60, 61, 102, 103, 106, 107, 108, 110, 111, 112	...(9)kanvkKgpwspeedvklkdyidkygtggnwialpqkiglkrCgKScRLrwLNYlrpnikhggfseeedriilslyisigsrwsiiaaqlpgrtDNdiKNYwNTKlkkkl(117)...	AtMYB102_I / AtMYB107_I / AtMYB112_I / AtMYB113_I / AtMYB114_I / AtMYB118_I / AtMYB11_I / AtMYB123_I / AtMYB13_I / AtMYB14_I / AtMYB22_I / AtMYB32_I / AtMYB33_I / AtMYB36_I / AtMYB39_I / AtMYB40_I / AtMYB41_I / AtMYB42_I / AtMYB47_I / AtMYB48_I / AtMYB52_I / AtMYB54_I / AtMYB55_I / AtMYB56_I / AtMYB59_I / AtMYB5_I / AtMYB61_I / AtMYB68_I / AtMYB74_I / AtMYB75_I / AtMYB81_I / AtMYB86_I / AtMYB90_I…	*14-62: PF00249 (Myb-like DNA-binding dom
								AtMYB36_II / AtMYB55_II / AtMYB69_II: GywdGTTr
Ma07_g25300	AtMYB103: 19087-20744 / AtMYB103 / Myb domain protein 103 / MYB transcription factor / Putative MYB family transcription factor / Putative transcription factor	AthaMYB 1.0	Arabidopsis thaliana	0.038	2023-06-13	51, 52, 54, 55, 56, 58, 59, 60, 101, 102, 105, 106, 109, 110, 111	...(46)lqrcgKScRLRwINYlrpdirrgrfspeeekliislhgvvgnrwahiashlpgrtDNeiKNywNSWikkki(116)...	AtMYB0_I / AtMYB103_I / AtMYB124_I / AtMYB18_I / AtMYB26_I / AtMYB43_I / AtMYB49_I / AtMYB50_I / AtMYB51_I / AtMYB67_I / AtMYB79_I / AtMYB82_I / AtMYB83_I / AtMYB89_I / AtMYB95_I: awmAGTTr	*14-61: PF00249 (Myb-like DNA-binding domain)
								AtMYB103_II: RkTwGKTr
Ma08_g01350	AtMYB94: AtMYB94 / MYB transcription factor / Putative transcription factor MYB94	AthaMYB 1.0	Arabidopsis thaliana	1e-97	20 / 20	14, 49, 50, 51, 52, 54, 55, 58, 59, 60, 67, 100, 101, 102, 103, 105, 106, 109, 110, 111	...(9)kigvkKgpwtpeediilvsyiqehgpgnwrsvpthtglrrCSKScRLrwTNYlrpgikRgnfteheekmilhlqallgnrwaaiasylperTDNDiKNywNTHlkkkl(116)...	AtMYB60_I / AtMYB72_I / AtMYB7_I / AtMYB94_I: ddMdGTTr	*14-61: PF00249 (Myb-like DNA-binding domain)
								AtMYB94_II / AtMYB96_II: GtTAGTTG
Ma08_g22930	AtMYB48: AtMYB48 / Myb-related protein 48 / Transcription factor MYB48	AthaMYB 1.0	Arabidopsis thaliana	0.87	-	-	.	AtMYB102_I / AtMYB107_I / AtMYB112_I / AtMYB113_I / AtMYB114_I / AtMYB118_I / AtMYB11_I / AtMYB123_I / AtMYB13_I / AtMYB14_I / AtMYB22_I / AtMYB32_I / AtMYB33_I / AtMYB36_I / AtMYB39_I / AtMYB40_I / AtMYB41_I / AtMYB42_I / AtMYB47_I / AtMYB48_I / AtMYB52_I / AtMYB54_I / AtMYB55_I / AtMYB56_I / AtMYB59_I / AtMYB5_I / AtMYB61_I / AtMYB68_I / AtMYB74_I / AtMYB75_I / AtMYB81_I / AtMYB86_I / AtMYB90_I…	9-56: PF00249 (Myb-like DNA-binding domain)
								AtMYB27_II / AtMYB48_II: rkTrGTTr
Ma09_g03970	AtMYB5: AtM2 / AtMYB5 / Myb-related protein 5 / Transcription repressor MYB5	AthaMYB 1.0	Arabidopsis thaliana	0.0008	2023-01-01	25	...(20)kmgmkRgpwtv(30)...	AtMYB102_I / AtMYB107_I / AtMYB112_I / AtMYB113_I / AtMYB114_I / AtMYB118_I / AtMYB11_I / AtMYB123_I / AtMYB13_I / AtMYB14_I / AtMYB22_I / AtMYB32_I / AtMYB33_I / AtMYB36_I / AtMYB39_I / AtMYB40_I / AtMYB41_I / AtMYB42_I / AtMYB47_I / AtMYB48_I / AtMYB52_I / AtMYB54_I / AtMYB55_I / AtMYB56_I / AtMYB59_I / AtMYB5_I / AtMYB61_I / AtMYB68_I / AtMYB74_I / AtMYB75_I / AtMYB81_I / AtMYB86_I / AtMYB90_I…	*25-72: PF00249 (Myb-like DNA-binding domain)
								AtMYB5_II: RbWdGTTR
Ma09_g15850	AtMYB43: AtMYB43 / Myb domain protein 43 / MYB transcription factor / Putative transcription factor / Putative uncharacterized protein At5g16600	AthaMYB 1.0	Arabidopsis thaliana	2e-86	15 / 16	14, 49, 51, 52, 54, 55, 58, 59, 60, 101, 102, 105, 106, 109, 110, 111	...(9)kvglkKgpwtieedkklinfiltnghccwralpklsgllrCgKScRLrwINYlrpdlkrgllseyeeqkvinlhaqlgnrwskiashlpgrtDNeiKNhwNTHikkkl(116)...	AtMYB0_I / AtMYB103_I / AtMYB124_I / AtMYB18_I / AtMYB26_I / AtMYB43_I / AtMYB49_I / AtMYB50_I / AtMYB51_I / AtMYB67_I / AtMYB79_I / AtMYB82_I / AtMYB83_I / AtMYB89_I / AtMYB95_I: awmAGTTr	*14-61: PF00249 (Myb-like DNA-binding domain)
								AtMYB40_II / AtMYB43_II / AtMYB47_II / AtMYB79_II / AtMYB91_II: rbTrGTTr
Ma10_g29310	AtMYB93: AtMYB93 / F21H2.9 protein / Myb domain protein 93 / MYB transcription factor	AthaMYB 1.0	Arabidopsis thaliana	3e-82	16 / 17	14, 49, 50, 51, 52, 54, 55, 58, 59, 60, 101, 102, 105, 106, 109, 110, 111	...(9)englkKgpwtpeedqklidyihkhghgswralpkladlnrCGKScRLrwTNYlrpdikrgkfsaeeeqtilhlhsilgnkwsaiathlqgrtDNeiKNfwNTHlkkkl(116)...	AtMYB93_II:GGTTGGTG	*14-61:PF00249 (Myb-like DNA-binding domain
Ma11_g00580	AtMYB9: AtMYB9	AthaMYB 1.0	Arabidopsis thaliana	0.0003	2023-01-01	14	...(9)englkKgpwtq(19)...	AtMYB102_I / AtMYB107_I / AtMYB112_I / AtMYB113_I / AtMYB114_I / AtMYB118_I / AtMYB11_I / AtMYB123_I / AtMYB13_I / AtMYB14_I / AtMYB22_I / AtMYB32_I / AtMYB33_I / AtMYB36_I / AtMYB39_I / AtMYB40_I / AtMYB41_I / AtMYB42_I / AtMYB47_I / AtMYB48_I / AtMYB52_I / AtMYB54_I / AtMYB55_I / AtMYB56_I / AtMYB59_I / AtMYB5_I / AtMYB61_I / AtMYB68_I / AtMYB74_I / AtMYB75_I / AtMYB81_I / AtMYB86_I / AtMYB90_I…	*14-61: PF00249 (Myb-like DNA-binding domain)
								AtMYB9_II: rsTwGkTr
Ma11_g12810	AtMYB62: 40023-38981 / AtMYB62 / MYB transcription factor / Putative transcription factor / R2R3-MYB transcription family	AthaMYB 1.0	Arabidopsis thaliana	2e-81	17 / 17	21, 56, 57, 58, 59, 61, 62, 65, 66, 67, 108, 109, 112, 113, 116, 117, 118	...(16)deelrRgpwtleedtlltnyilhngegrwnhvakcaglkrTGKScRLrwLNYlkpdirrgnltpqeqllilelhskwgnrwskiaqylpgrtDNeiKNywRTRvqkqa(123)...	AtMYB100_I / AtMYB106_I / AtMYB109_I / AtMYB116_I / AtMYB19_I / AtMYB1_I / AtMYB23_I / AtMYB25_I / AtMYB31_I / AtMYB44_I / AtMYB53_I / AtMYB62_I / AtMYB66_I / AtMYB69_I / AtMYB70_I / AtMYB73_I / AtMYB77_I / AtMYB78_I / AtMYB85_I / AtMYB88_I::wamaGTTr	*21-68::PF00249 (Myb-like DNA-binding domain)
								AtMYB108_II / AtMYB62_II::GTwrGTTr
