# Supplementary material for: Transcriptome analysis provides insight into the regulatory mechanisms underlying pollen germination recovery at normal high ambient temperature in wild banana (Musa itinerans)
Source: Front Plant Sci. 2023 Sep 26;14:1255418. doi: 10.3389/fpls.2023.1255418 (PMC10562711; doi:10.3389/fpls.2023.1255418)
Supplement: Supplementary Table 8 — Identification of cis-element related to the DEGs related to the recovery of pollen germination. [file Table_8.xlsx]

## Sheet: Sheet1
Gene ID	footprinDB PWM / Consensus	Alt ID	Sequence Name	Strand	Start	End	p-value	q-value	Matched Sequence
Ma01_g01960	AtMYB15_I / AtMYB96_I: wwcaGTTr	AAAAGTTA	Ma09_g01640	-	303	310	2.65e-05	0.398	AAAAGTTA
		AAAAGTTA	Ma09_g01640	-	753	760	2.65e-05	0.398	AAAAGTTA
		AAAAGTTA	Ma08_g18570	+	278	285	2.65e-05	0.398	AAAAGTTA
		AAAAGTTA	Ma08_g02860	+	961	968	2.65e-05	0.398	AAAAGTTA
		AAAAGTTA	Ma09_g01640	+	1450	1457	2.65e-05	0.398	AAAAGTTA
		AAAAGTTA	Ma08_g27730	+	1485	1492	2.65e-05	0.398	AAAAGTTA
		ATTAGTTG	Ma09_g07920	-	1199	1206	2.18e-05	0.665	ATTAGTTG
		ATTAGTTG	Ma04_g08050	-	1886	1893	2.18e-05	0.665	ATTAGTTG
		ATTAGTTG	Ma11_g10400	+	1780	1787	2.18e-05	0.665	ATTAGTTG
		TACTGTTG	Ma08_g04720	-	579	586	1.79e-05	0.57	TACTGTTG
		TACTGTTG	Ma04_g30160	+	1180	1187	1.79e-05	0.57	TACTGTTG
		TACTGTTG	Ma04_g08050	+	1806	1813	1.79e-05	0.57	TACTGTTG
		TGCGGTTG	Ma08_g27730	-	528	535	1.21e-05	1	TGCGGTTG
	AtMYB94_II / AtMYB96_II: GtTAGTTG	GTTAGTTA	Ma11_g19150	-	766	773	2.18e-05	0.994	GTTAGTTA
		GTTAGTTA	Ma05_g18400	+	1209	1216	2.18e-05	0.994	GTTAGTTA
		GCTTGTTG	Ma09_g07920	+	1022	1029	1.47e-05	1	GCTTGTTG
		GGTAGGTG	Ma10_g09480	-	946	953	1.21e-05	0.384	GGTAGGTG
		GGTAGGTG	Ma11_g21240	-	1880	1887	1.21e-05	0.384	GGTAGGTG
		GGTAGGTG	Ma08_g04720	+	1980	1987	1.21e-05	0.384	GGTAGGTG
		GTTAGTTG	Ma11_g19150	+	1105	1112	1.79e-05	0.427	GTTAGTTG
		GTTAGTTG	Ma11_g19150	-	1369	1376	1.79e-05	0.427	GTTAGTTG
		GTTAGTTG	Ma08_g18570	+	1551	1558	1.79e-05	0.427	GTTAGTTG
		GTTAGTTG	Ma09_g24370	+	1796	1803	1.79e-05	0.427	GTTAGTTG
Ma01_g19370	AtMYB15_I / AtMYB96_I: wwcaGTTr	AAAAGTTA	Ma09_g01640	-	303	310	2.65e-05	0.398	AAAAGTTA
		AAAAGTTA	Ma09_g01640	-	753	760	2.65e-05	0.398	AAAAGTTA
		AAAAGTTA	Ma08_g18570	+	278	285	2.65e-05	0.398	AAAAGTTA
		AAAAGTTA	Ma08_g02860	+	961	968	2.65e-05	0.398	AAAAGTTA
		AAAAGTTA	Ma09_g01640	+	1450	1457	2.65e-05	0.398	AAAAGTTA
		AAAAGTTA	Ma08_g27730	+	1485	1492	2.65e-05	0.398	AAAAGTTA
		ATTAGTTG	Ma09_g07920	-	1199	1206	2.18e-05	0.665	ATTAGTTG
		ATTAGTTG	Ma04_g08050	-	1886	1893	2.18e-05	0.665	ATTAGTTG
		ATTAGTTG	Ma11_g10400	+	1780	1787	2.18e-05	0.665	ATTAGTTG
		TACTGTTG	Ma08_g04720	-	579	586	1.79e-05	0.57	TACTGTTG
		TACTGTTG	Ma04_g30160	+	1180	1187	1.79e-05	0.57	TACTGTTG
		TACTGTTG	Ma04_g08050	+	1806	1813	1.79e-05	0.57	TACTGTTG
		TGCGGTTG	Ma08_g27730	-	528	535	1.21e-05	1	TGCGGTTG
	AtMYB94_II / AtMYB96_II: GtTAGTTG	GTTAGTTA	Ma11_g19150	-	766	773	2.18e-05	0.994	GTTAGTTA
		GTTAGTTA	Ma05_g18400	+	1209	1216	2.18e-05	0.994	GTTAGTTA
		GCTTGTTG	Ma09_g07920	+	1022	1029	1.47e-05	1	GCTTGTTG
		GGTAGGTG	Ma10_g09480	-	946	953	1.21e-05	0.384	GGTAGGTG
		GGTAGGTG	Ma11_g21240	-	1880	1887	1.21e-05	0.384	GGTAGGTG
		GGTAGGTG	Ma08_g04720	+	1980	1987	1.21e-05	0.384	GGTAGGTG
		GTTAGTTG	Ma11_g19150	+	1105	1112	1.79e-05	0.427	GTTAGTTG
		GTTAGTTG	Ma11_g19150	-	1369	1376	1.79e-05	0.427	GTTAGTTG
		GTTAGTTG	Ma08_g18570	+	1551	1558	1.79e-05	0.427	GTTAGTTG
		GTTAGTTG	Ma09_g24370	+	1796	1803	1.79e-05	0.427	GTTAGTTG
Ma03_g15540	AtMYB0_I / AtMYB103_I / AtMYB124_I / AtMYB18_I / AtMYB26_I / AtMYB43_I / AtMYB49_I / AtMYB50_I / AtMYB51_I / AtMYB67_I / AtMYB79_I / AtMYB82_I / AtMYB83_I / AtMYB89_I / AtMYB95_I: awmAGTTr	AAAAGTTA	Ma09_g01640	-	303	310	2.65e-05	0.398	AAAAGTTA
		AAAAGTTA	Ma09_g01640	-	753	760	2.65e-05	0.398	AAAAGTTA
		AAAAGTTA	Ma08_g18570	+	278	285	2.65e-05	0.398	AAAAGTTA
		AAAAGTTA	Ma08_g02860	+	961	968	2.65e-05	0.398	AAAAGTTA
		AAAAGTTA	Ma09_g01640	+	1450	1457	2.65e-05	0.398	AAAAGTTA
		AAAAGTTA	Ma08_g27730	+	1485	1492	2.65e-05	0.398	AAAAGTTA
		ACAAGTTA	Ma09_g07920	-	1260	1267	2.18e-05	1	ACAAGTTA
		ATTAGTTG	Ma09_g07920	-	1199	1206	2.18e-05	0.665	ATTAGTTG
		ATTAGTTG	Ma04_g08050	-	1886	1893	2.18e-05	0.665	ATTAGTTG
		ATTAGTTG	Ma11_g10400	+	1780	1787	2.18e-05	0.665	ATTAGTTG
		TACTGTTG	Ma08_g04720	-	579	586	1.79e-05	0.57	TACTGTTG
		TACTGTTG	Ma04_g30160	+	1180	1187	1.79e-05	0.57	TACTGTTG
		TACTGTTG	Ma04_g08050	+	1806	1813	1.79e-05	0.57	TACTGTTG
	AtMYB40_II / AtMYB43_II / AtMYB47_II / AtMYB79_II / AtMYB91_II: rbTrGTTr	AGTAGTTA	Ma11_g10400	+	1202	1209	2.18e-05	1	AGTAGTTA
		GCTTGTTG	Ma09_g07920	+	1022	1029	1.47e-05	1	GCTTGTTG
		GTTAGTTG	Ma11_g19150	+	1105	1112	1.79e-05	0.427	GTTAGTTG
		GTTAGTTG	Ma11_g19150	-	1369	1376	1.79e-05	0.427	GTTAGTTG
		GTTAGTTG	Ma08_g18570	+	1551	1558	1.79e-05	0.427	GTTAGTTG
		GTTAGTTG	Ma09_g24370	+	1796	1803	1.79e-05	0.427	GTTAGTTG
Ma04_g24060	AtMYB4_I: rymAGTTA	ACAAGTTA	Ma09_g07920	-	1260	1267	2.18e-05	1	ACAAGTTA
Ma04_g28610	AtMYB102_I / AtMYB107_I / AtMYB112_I / AtMYB113_I / AtMYB114_I / AtMYB118_I / AtMYB11_I / AtMYB123_I / AtMYB13_I / AtMYB14_I / AtMYB22_I / AtMYB32_I / AtMYB33_I / AtMYB36_I / AtMYB39_I / AtMYB40_I / AtMYB41_I / AtMYB42_I / AtMYB47_I / AtMYB48_I / AtMYB52_I / AtMYB54_I / AtMYB55_I / AtMYB56_I / AtMYB59_I / AtMYB5_I / AtMYB61_I / AtMYB68_I / AtMYB74_I / AtMYB75_I / AtMYB81_I / AtMYB86_I / AtMYB90_I…	AAAAGTTA	Ma09_g01640	-	303	310	2.65e-05	0.398	AAAAGTTA
		AAAAGTTA	Ma09_g01640	-	753	760	2.65e-05	0.398	AAAAGTTA
		AAAAGTTA	Ma08_g18570	+	278	285	2.65e-05	0.398	AAAAGTTA
		AAAAGTTA	Ma08_g02860	+	961	968	2.65e-05	0.398	AAAAGTTA
		AAAAGTTA	Ma09_g01640	+	1450	1457	2.65e-05	0.398	AAAAGTTA
		AAAAGTTA	Ma08_g27730	+	1485	1492	2.65e-05	0.398	AAAAGTTA
		TGCGGTTG	Ma08_g27730	-	528	535	1.21e-05	1	TGCGGTTG
		TACTGTTG	Ma08_g04720	-	579	586	1.79e-05	0.563	TACTGTTG
		TACTGTTG	Ma04_g30160	+	1180	1187	1.79e-05	0.563	TACTGTTG
		TACTGTTG	Ma04_g08050	+	1806	1813	1.79e-05	0.563	TACTGTTG
		ACAAGTTA	Ma09_g07920	-	1260	1267	2.18e-05	1	ACAAGTTA
		ATTAGTTG	Ma09_g07920	-	1199	1206	2.18e-05	0.686	ATTAGTTG
		ATTAGTTG	Ma04_g08050	-	1886	1893	2.18e-05	0.686	ATTAGTTG
		ATTAGTTG	Ma11_g10400	+	1780	1787	2.18e-05	0.686	ATTAGTTG
	AtMYB112_II: rbTaGTTr	GCTTGTTG	Ma09_g07920	+	1022	1029	1.47e-05	1	GCTTGTTG
		GTTAGTTG	Ma11_g19150	+	1105	1112	1.79e-05	0.423	GTTAGTTG
		GTTAGTTG	Ma11_g19150	-	1369	1376	1.79e-05	0.423	GTTAGTTG
		GTTAGTTG	Ma08_g18570	+	1551	1558	1.79e-05	0.423	GTTAGTTG
		GTTAGTTG	Ma09_g24370	+	1796	1803	1.79e-05	0.423	GTTAGTTG
		AGTAGTTA	Ma11_g10400	+	1202	1209	2.18e-05	1	AGTAGTTA
Ma06_g03670	AtMYB102_I / AtMYB107_I / AtMYB112_I / AtMYB113_I / AtMYB114_I / AtMYB118_I / AtMYB11_I / AtMYB123_I / AtMYB13_I / AtMYB14_I / AtMYB22_I / AtMYB32_I / AtMYB33_I / AtMYB36_I / AtMYB39_I / AtMYB40_I / AtMYB41_I / AtMYB42_I / AtMYB47_I / AtMYB48_I / AtMYB52_I / AtMYB54_I / AtMYB55_I / AtMYB56_I / AtMYB59_I / AtMYB5_I / AtMYB61_I / AtMYB68_I / AtMYB74_I / AtMYB75_I / AtMYB81_I / AtMYB86_I / AtMYB90_I…	TGCGGTTG	Ma08_g27730	-	528	535	1.21e-05	1	TGCGGTTG
		TACTGTTG	Ma08_g04720	-	579	586	1.79e-05	0.57	TACTGTTG
		TACTGTTG	Ma04_g30160	+	1180	1187	1.79e-05	0.57	TACTGTTG
		TACTGTTG	Ma04_g08050	+	1806	1813	1.79e-05	0.57	TACTGTTG
		ACAAGTTA	Ma09_g07920	-	1260	1267	2.18e-05	1	ACAAGTTA
		ATTAGTTG	Ma09_g07920	-	1199	1206	2.18e-05	0.656	ATTAGTTG
		ATTAGTTG	Ma04_g08050	-	1886	1893	2.18e-05	0.656	ATTAGTTG
		ATTAGTTG	Ma11_g10400	+	1780	1787	2.18e-05	0.656	ATTAGTTG
		AAAAGTTA	Ma09_g01640	-	303	310	2.65e-05	0.398	AAAAGTTA
		AAAAGTTA	Ma09_g01640	-	753	760	2.65e-05	0.398	AAAAGTTA
		AAAAGTTA	Ma08_g18570	+	278	285	2.65e-05	0.398	AAAAGTTA
		AAAAGTTA	Ma08_g02860	+	961	968	2.65e-05	0.398	AAAAGTTA
		AAAAGTTA	Ma09_g01640	+	1450	1457	2.65e-05	0.398	AAAAGTTA
		AAAAGTTA	Ma08_g27730	+	1485	1492	2.65e-05	0.398	AAAAGTTA
	AtMYB36_II / AtMYB55_II / AtMYB69_II: GywdGTTr	GCTTGTTG	Ma09_g07920	+	1022	1029	1.47e-05	1	GCTTGTTG
		GTTAGTTA	Ma11_g19150	-	766	773	2.18e-05	0.994	GTTAGTTA
		GTTAGTTA	Ma05_g18400	+	1209	1216	2.18e-05	0.994	GTTAGTTA
Ma07_g25300	AtMYB0_I / AtMYB103_I / AtMYB124_I / AtMYB18_I / AtMYB26_I / AtMYB43_I / AtMYB49_I / AtMYB50_I / AtMYB51_I / AtMYB67_I / AtMYB79_I / AtMYB82_I / AtMYB83_I / AtMYB89_I / AtMYB95_I: awmAGTTr	TACTGTTG	Ma08_g04720	-	579	586	1.79e-05	0.57	TACTGTTG
		TACTGTTG	Ma04_g30160	+	1180	1187	1.79e-05	0.57	TACTGTTG
		TACTGTTG	Ma04_g08050	+	1806	1813	1.79e-05	0.57	TACTGTTG
		ACAAGTTA	Ma09_g07920	-	1260	1267	2.18e-05	1	ACAAGTTA
		ATTAGTTG	Ma09_g07920	-	1199	1206	2.18e-05	0.656	ATTAGTTG
		ATTAGTTG	Ma04_g08050	-	1886	1893	2.18e-05	0.656	ATTAGTTG
		ATTAGTTG	Ma11_g10400	+	1780	1787	2.18e-05	0.656	ATTAGTTG
		AAAAGTTA	Ma09_g01640	-	303	310	2.65e-05	0.398	AAAAGTTA
		AAAAGTTA	Ma09_g01640	-	753	760	2.65e-05	0.398	AAAAGTTA
		AAAAGTTA	Ma08_g18570	+	278	285	2.65e-05	0.398	AAAAGTTA
		AAAAGTTA	Ma08_g02860	+	961	968	2.65e-05	0.398	AAAAGTTA
		AAAAGTTA	Ma09_g01640	+	1450	1457	2.65e-05	0.398	AAAAGTTA
		AAAAGTTA	Ma08_g27730	+	1485	1492	2.65e-05	0.398	AAAAGTTA
	AtMYB103_II: RkTwGKTr	GGTTGGTG	Ma10_g04000	-	1913	1920	1.21e-05	0.576	GGTTGGTG
		GGTTGGTG	Ma11_g14300	-	1936	1943	1.21e-05	0.576	GGTTGGTG
		GGTAGGTG	Ma10_g09480	-	946	953	1.21e-05	0.384	GGTAGGTG
		GGTAGGTG	Ma11_g21240	-	1880	1887	1.21e-05	0.384	GGTAGGTG
		GGTAGGTG	Ma08_g04720	+	1980	1987	1.21e-05	0.384	GGTAGGTG
		GCTTGTTG	Ma09_g07920	+	1022	1029	1.47e-05	1	GCTTGTTG
		GTTAGTTG	Ma11_g19150	+	1105	1112	1.79e-05	0.426	GTTAGTTG
		GTTAGTTG	Ma11_g19150	-	1369	1376	1.79e-05	0.426	GTTAGTTG
		GTTAGTTG	Ma08_g18570	+	1551	1558	1.79e-05	0.426	GTTAGTTG
		GTTAGTTG	Ma09_g24370	+	1796	1803	1.79e-05	0.426	GTTAGTTG
		GTTAGTTA	Ma11_g19150	-	766	773	2.18e-05	0.994	GTTAGTTA
		AGTAGTTA	Ma11_g10400	+	1202	1209	2.18e-05	1	AGTAGTTA
		GTTAGTTA	Ma05_g18400	+	1209	1216	2.18e-05	0.994	GTTAGTTA
Ma08_g01350	AtMYB60_I / AtMYB72_I / AtMYB7_I / AtMYB94_I: ddMdGTTr	TGCGGTTG	Ma08_g27730	-	528	535	1.21e-05	1	TGCGGTTG
		TACTGTTG	Ma08_g04720	-	579	586	1.79e-05	0.57	TACTGTTG
		TACTGTTG	Ma04_g30160	+	1180	1187	1.79e-05	0.57	TACTGTTG
		TACTGTTG	Ma04_g08050	+	1806	1813	1.79e-05	0.57	TACTGTTG
		AAAAGTTA	Ma09_g01640	-	303	310	2.65e-05	0.398	AAAAGTTA
		AAAAGTTA	Ma09_g01640	-	753	760	2.65e-05	0.398	AAAAGTTA
		AAAAGTTA	Ma08_g18570	+	278	285	2.65e-05	0.398	AAAAGTTA
		AAAAGTTA	Ma08_g02860	+	961	968	2.65e-05	0.398	AAAAGTTA
		AAAAGTTA	Ma09_g01640	+	1450	1457	2.65e-05	0.398	AAAAGTTA
		AAAAGTTA	Ma08_g27730	+	1485	1492	2.65e-05	0.398	AAAAGTTA
	AtMYB94_II / AtMYB96_II: GtTAGTTG	GGTAGGTG	Ma10_g09480	-	946	953	1.21e-05	0.384	GGTAGGTG
		GGTAGGTG	Ma11_g21240	-	1880	1887	1.21e-05	0.384	GGTAGGTG
		GGTAGGTG	Ma08_g04720	+	1980	1987	1.21e-05	0.384	GGTAGGTG
		GCTTGTTG	Ma09_g07920	+	1022	1029	1.47e-05	1	GCTTGTTG
		GTTAGTTG	Ma11_g19150	+	1105	1112	1.79e-05	0.428	GTTAGTTG
		GTTAGTTG	Ma11_g19150	-	1369	1376	1.79e-05	0.428	GTTAGTTG
		GTTAGTTG	Ma08_g18570	+	1551	1558	1.79e-05	0.428	GTTAGTTG
		GTTAGTTG	Ma09_g24370	+	1796	1803	1.79e-05	0.428	GTTAGTTG
		GTTAGTTA	Ma11_g19150	-	766	773	2.18e-05	0.994	GTTAGTTA
		GTTAGTTA	Ma05_g18400	+	1209	1216	2.18e-05	0.994	GTTAGTTA
Ma08_g22930	AtMYB102_I / AtMYB107_I / AtMYB112_I / AtMYB113_I / AtMYB114_I / AtMYB118_I / AtMYB11_I / AtMYB123_I / AtMYB13_I / AtMYB14_I / AtMYB22_I / AtMYB32_I / AtMYB33_I / AtMYB36_I / AtMYB39_I / AtMYB40_I / AtMYB41_I / AtMYB42_I / AtMYB47_I / AtMYB48_I / AtMYB52_I / AtMYB54_I / AtMYB55_I / AtMYB56_I / AtMYB59_I / AtMYB5_I / AtMYB61_I / AtMYB68_I / AtMYB74_I / AtMYB75_I / AtMYB81_I / AtMYB86_I / AtMYB90_I…	TGCGGTTG	Ma08_g27730	-	528	535	1.21e-05	1	TGCGGTTG
		TACTGTTG	Ma08_g04720	-	579	586	1.79e-05	0.57	TACTGTTG
		TACTGTTG	Ma04_g30160	+	1180	1187	1.79e-05	0.57	TACTGTTG
		TACTGTTG	Ma04_g08050	+	1806	1813	1.79e-05	0.57	TACTGTTG
		ACAAGTTA	Ma09_g07920	-	1260	1267	2.18e-05	1	ACAAGTTA
		ATTAGTTG	Ma09_g07920	-	1199	1206	2.18e-05	0.656	ATTAGTTG
		ATTAGTTG	Ma04_g08050	-	1886	1893	2.18e-05	0.656	ATTAGTTG
		ATTAGTTG	Ma11_g10400	+	1780	1787	2.18e-05	0.656	ATTAGTTG
		AAAAGTTA	Ma09_g01640	-	303	310	2.65e-05	0.398	AAAAGTTA
		AAAAGTTA	Ma09_g01640	-	753	760	2.65e-05	0.398	AAAAGTTA
		AAAAGTTA	Ma08_g18570	+	278	285	2.65e-05	0.398	AAAAGTTA
		AAAAGTTA	Ma08_g02860	+	961	968	2.65e-05	0.398	AAAAGTTA
		AAAAGTTA	Ma09_g01640	+	1450	1457	2.65e-05	0.398	AAAAGTTA
		AAAAGTTA	Ma08_g27730	+	1485	1492	2.65e-05	0.398	AAAAGTTA
	AtMYB27_II / AtMYB48_II:聽rkTrGTTr	GCTTGTTG	Ma09_g07920	+	1022	1029	1.47e-05	1	GCTTGTTG
		GTTAGTTG	Ma11_g19150	+	1105	1112	1.79e-05	0.421	GTTAGTTG
		GTTAGTTG	Ma11_g19150	-	1369	1376	1.79e-05	0.421	GTTAGTTG
		GTTAGTTG	Ma08_g18570	+	1551	1558	1.79e-05	0.421	GTTAGTTG
		GTTAGTTG	Ma09_g24370	+	1796	1803	1.79e-05	0.421	GTTAGTTG
		GTTAGTTA	Ma11_g19150	-	766	773	2.18e-05	0.994	GTTAGTTA
		AGTAGTTA	Ma11_g10400	+	1202	1209	2.18e-05	1	AGTAGTTA
		GTTAGTTA	Ma05_g18400	+	1209	1216	2.18e-05	0.994	GTTAGTTA
Ma09_g03970	AtMYB102_I / AtMYB107_I / AtMYB112_I / AtMYB113_I / AtMYB114_I / AtMYB118_I / AtMYB11_I / AtMYB123_I / AtMYB13_I / AtMYB14_I / AtMYB22_I / AtMYB32_I / AtMYB33_I / AtMYB36_I / AtMYB39_I / AtMYB40_I / AtMYB41_I / AtMYB42_I / AtMYB47_I / AtMYB48_I / AtMYB52_I / AtMYB54_I / AtMYB55_I / AtMYB56_I / AtMYB59_I / AtMYB5_I / AtMYB61_I / AtMYB68_I / AtMYB74_I / AtMYB75_I / AtMYB81_I / AtMYB86_I / AtMYB90_I…	TGCGGTTG	Ma08_g27730	-	528	535	1.21e-05	1	TGCGGTTG
		TACTGTTG	Ma08_g04720	-	579	586	1.79e-05	0.57	TACTGTTG
		TACTGTTG	Ma04_g30160	+	1180	1187	1.79e-05	0.57	TACTGTTG
		TACTGTTG	Ma04_g08050	+	1806	1813	1.79e-05	0.57	TACTGTTG
		ACAAGTTA	Ma09_g07920	-	1260	1267	2.18e-05	1	ACAAGTTA
		ATTAGTTG	Ma09_g07920	-	1199	1206	2.18e-05	0.656	ATTAGTTG
		ATTAGTTG	Ma04_g08050	-	1886	1893	2.18e-05	0.656	ATTAGTTG
		ATTAGTTG	Ma11_g10400	+	1780	1787	2.18e-05	0.656	ATTAGTTG
		AAAAGTTA	Ma09_g01640	-	303	310	2.65e-05	0.398	AAAAGTTA
		AAAAGTTA	Ma09_g01640	-	753	760	2.65e-05	0.398	AAAAGTTA
		AAAAGTTA	Ma08_g18570	+	278	285	2.65e-05	0.398	AAAAGTTA
		AAAAGTTA	Ma08_g02860	+	961	968	2.65e-05	0.398	AAAAGTTA
		AAAAGTTA	Ma09_g01640	+	1450	1457	2.65e-05	0.398	AAAAGTTA
		AAAAGTTA	Ma08_g27730	+	1485	1492	2.65e-05	0.398	AAAAGTTA
	AtMYB5_II: RbWdGTTR	GCTTGTTG	Ma09_g07920	+	1022	1029	1.47e-05	1	GCTTGTTG
		GTTAGTTA	Ma11_g19150	-	766	773	2.18e-05	0.994	GTTAGTTA
		AGTAGTTA	Ma11_g10400	+	1202	1209	2.18e-05	1	AGTAGTTA
		GTTAGTTA	Ma05_g18400	+	1209	1216	2.18e-05	0.994	GTTAGTTA
Ma09_g15850	AtMYB0_I / AtMYB103_I / AtMYB124_I / AtMYB18_I / AtMYB26_I / AtMYB43_I / AtMYB49_I / AtMYB50_I / AtMYB51_I / AtMYB67_I / AtMYB79_I / AtMYB82_I / AtMYB83_I / AtMYB89_I / AtMYB95_I: awmAGTTr	TACTGTTG	Ma08_g04720	-	579	586	1.79e-05	0.57	TACTGTTG
		TACTGTTG	Ma04_g30160	+	1180	1187	1.79e-05	0.57	TACTGTTG
		TACTGTTG	Ma04_g08050	+	1806	1813	1.79e-05	0.57	TACTGTTG
		ACAAGTTA	Ma09_g07920	-	1260	1267	2.18e-05	1	ACAAGTTA
		ATTAGTTG	Ma09_g07920	-	1199	1206	2.18e-05	0.656	ATTAGTTG
		ATTAGTTG	Ma04_g08050	-	1886	1893	2.18e-05	0.656	ATTAGTTG
		ATTAGTTG	Ma11_g10400	+	1780	1787	2.18e-05	0.656	ATTAGTTG
		AAAAGTTA	Ma09_g01640	-	303	310	2.65e-05	0.398	AAAAGTTA
		AAAAGTTA	Ma09_g01640	-	753	760	2.65e-05	0.398	AAAAGTTA
		AAAAGTTA	Ma08_g18570	+	278	285	2.65e-05	0.398	AAAAGTTA
		AAAAGTTA	Ma08_g02860	+	961	968	2.65e-05	0.398	AAAAGTTA
		AAAAGTTA	Ma09_g01640	+	1450	1457	2.65e-05	0.398	AAAAGTTA
		AAAAGTTA	Ma08_g27730	+	1485	1492	2.65e-05	0.398	AAAAGTTA
	AtMYB40_II / AtMYB43_II / AtMYB47_II / AtMYB79_II / AtMYB91_II: rbTrGTTr	GCTTGTTG	Ma09_g07920	+	1022	1029	1.47e-05	1	GCTTGTTG
		GTTAGTTG	Ma11_g19150	+	1105	1112	1.79e-05	0.421	GTTAGTTG
		GTTAGTTG	Ma11_g19150	-	1369	1376	1.79e-05	0.421	GTTAGTTG
		GTTAGTTG	Ma08_g18570	+	1551	1558	1.79e-05	0.421	GTTAGTTG
		GTTAGTTG	Ma09_g24370	+	1796	1803	1.79e-05	0.421	GTTAGTTG
		AGTAGTTA	Ma11_g10400	+	1202	1209	2.18e-05	1	AGTAGTTA
Ma10_g29310	AtMYB93_II: GGTTGGTG	GGTTGGTG	Ma10_g04000	-	1913	1920	1.21e-05	0.577	GGTTGGTG
		GGTTGGTG	Ma11_g14300	-	1936	1943	1.21e-05	0.577	GGTTGGTG
Ma11_g00580	AtMYB102_I / AtMYB107_I / AtMYB112_I / AtMYB113_I / AtMYB114_I / AtMYB118_I / AtMYB11_I / AtMYB123_I / AtMYB13_I / AtMYB14_I / AtMYB22_I / AtMYB32_I / AtMYB33_I / AtMYB36_I / AtMYB39_I / AtMYB40_I / AtMYB41_I / AtMYB42_I / AtMYB47_I / AtMYB48_I / AtMYB52_I / AtMYB54_I / AtMYB55_I / AtMYB56_I / AtMYB59_I / AtMYB5_I / AtMYB61_I / AtMYB68_I / AtMYB74_I / AtMYB75_I / AtMYB81_I / AtMYB86_I / AtMYB90_I…	TGCGGTTG	Ma08_g27730	-	528	535	1.21e-05	1	TGCGGTTG
		TACTGTTG	Ma08_g04720	-	579	586	1.79e-05	0.57	TACTGTTG
		TACTGTTG	Ma04_g30160	+	1180	1187	1.79e-05	0.57	TACTGTTG
		TACTGTTG	Ma04_g08050	+	1806	1813	1.79e-05	0.57	TACTGTTG
		ACAAGTTA	Ma09_g07920	-	1260	1267	2.18e-05	1	ACAAGTTA
		ATTAGTTG	Ma09_g07920	-	1199	1206	2.18e-05	0.656	ATTAGTTG
		ATTAGTTG	Ma04_g08050	-	1886	1893	2.18e-05	0.656	ATTAGTTG
		ATTAGTTG	Ma11_g10400	+	1780	1787	2.18e-05	0.656	ATTAGTTG
		AAAAGTTA	Ma09_g01640	-	303	310	2.65e-05	0.398	AAAAGTTA
		AAAAGTTA	Ma09_g01640	-	753	760	2.65e-05	0.398	AAAAGTTA
		AAAAGTTA	Ma08_g18570	+	278	285	2.65e-05	0.398	AAAAGTTA
		AAAAGTTA	Ma08_g02860	+	961	968	2.65e-05	0.398	AAAAGTTA
		AAAAGTTA	Ma09_g01640	+	1450	1457	2.65e-05	0.398	AAAAGTTA
		AAAAGTTA	Ma08_g27730	+	1485	1492	2.65e-05	0.398	AAAAGTTA
	AtMYB9_II: rsTwGkTr	GGTTGGTG	Ma10_g04000	-	1913	1920	1.21e-05	0.577	GGTTGGTG
		GGTTGGTG	Ma11_g14300	-	1936	1943	1.21e-05	0.577	GGTTGGTG
		GGTAGGTG	Ma10_g09480	-	946	953	1.21e-05	0.384	GGTAGGTG
		GGTAGGTG	Ma11_g21240	-	1880	1887	1.21e-05	0.384	GGTAGGTG
		GGTAGGTG	Ma08_g04720	+	1980	1987	1.21e-05	0.384	GGTAGGTG
		GCTTGTTG	Ma09_g07920	+	1022	1029	1.47e-05	1	GCTTGTTG
		AGTAGTTA	Ma11_g10400	+	1202	1209	2.18e-05	1	AGTAGTTA
Ma11_g12810	AtMYB100_I / AtMYB106_I / AtMYB109_I / AtMYB116_I / AtMYB19_I / AtMYB1_I / AtMYB23_I / AtMYB25_I / AtMYB31_I / AtMYB44_I / AtMYB53_I / AtMYB62_I / AtMYB66_I / AtMYB69_I / AtMYB70_I / AtMYB73_I / AtMYB77_I / AtMYB78_I / AtMYB85_I / AtMYB88_I: wamaGTTr	TGCGGTTG	Ma08_g27730	-	528	535	1.21e-05	1	TGCGGTTG
		TACTGTTG	Ma08_g04720	-	579	586	1.79e-05	0.563	TACTGTTG
		TACTGTTG	Ma04_g30160	+	1180	1187	1.79e-05	0.563	TACTGTTG
		TACTGTTG	Ma04_g08050	+	1806	1813	1.79e-05	0.563	TACTGTTG
		ACAAGTTA	Ma09_g07920	-	1260	1267	2.18e-05	1	ACAAGTTA
		AAAAGTTA	Ma09_g01640	-	303	310	2.65e-05	0.398	AAAAGTTA
		AAAAGTTA	Ma09_g01640	-	753	760	2.65e-05	0.398	AAAAGTTA
		AAAAGTTA	Ma08_g18570	+	278	285	2.65e-05	0.398	AAAAGTTA
		AAAAGTTA	Ma08_g02860	+	961	968	2.65e-05	0.398	AAAAGTTA
		AAAAGTTA	Ma09_g01640	+	1450	1457	2.65e-05	0.398	AAAAGTTA
		AAAAGTTA	Ma08_g27730	+	1485	1492	2.65e-05	0.398	AAAAGTTA
	AtMYB108_II / AtMYB62_II: GTwrGTTr	GTTAGTTG	Ma11_g19150	+	1105	1112	1.79e-05	0.427	GTTAGTTG
		GTTAGTTG	Ma11_g19150	-	1369	1376	1.79e-05	0.427	GTTAGTTG
		GTTAGTTG	Ma08_g18570	+	1551	1558	1.79e-05	0.427	GTTAGTTG
		GTTAGTTG	Ma09_g24370	+	1796	1803	1.79e-05	0.427	GTTAGTTG
